# Supplementary material for: HIV integration site selection: Analysis by massively parallel pyrosequencing reveals association with epigenetic modifications
Source: HighWire-hosted journal article supplement (doi:10.1101/gr.6286907), 2007-06-01

## ENCODE Region: ENm001

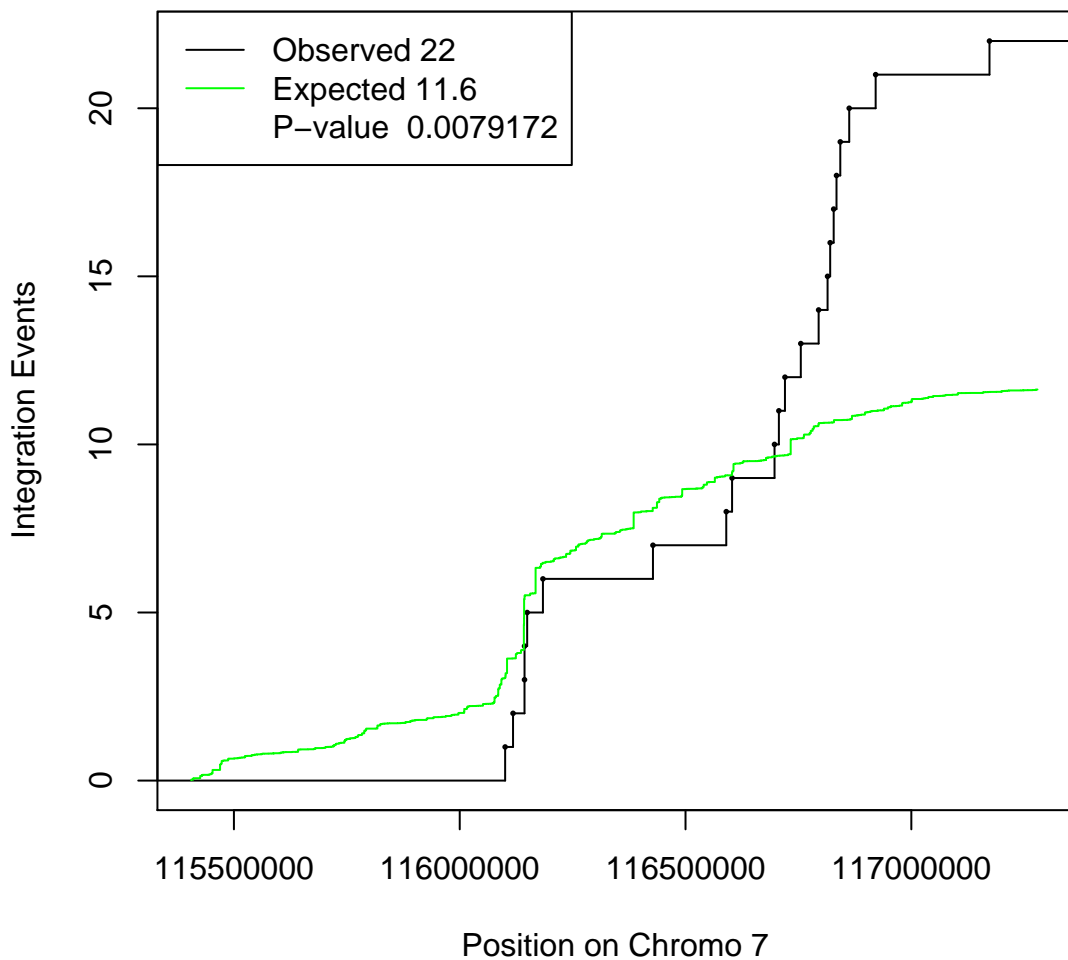

## ENCODE Region: ENm002

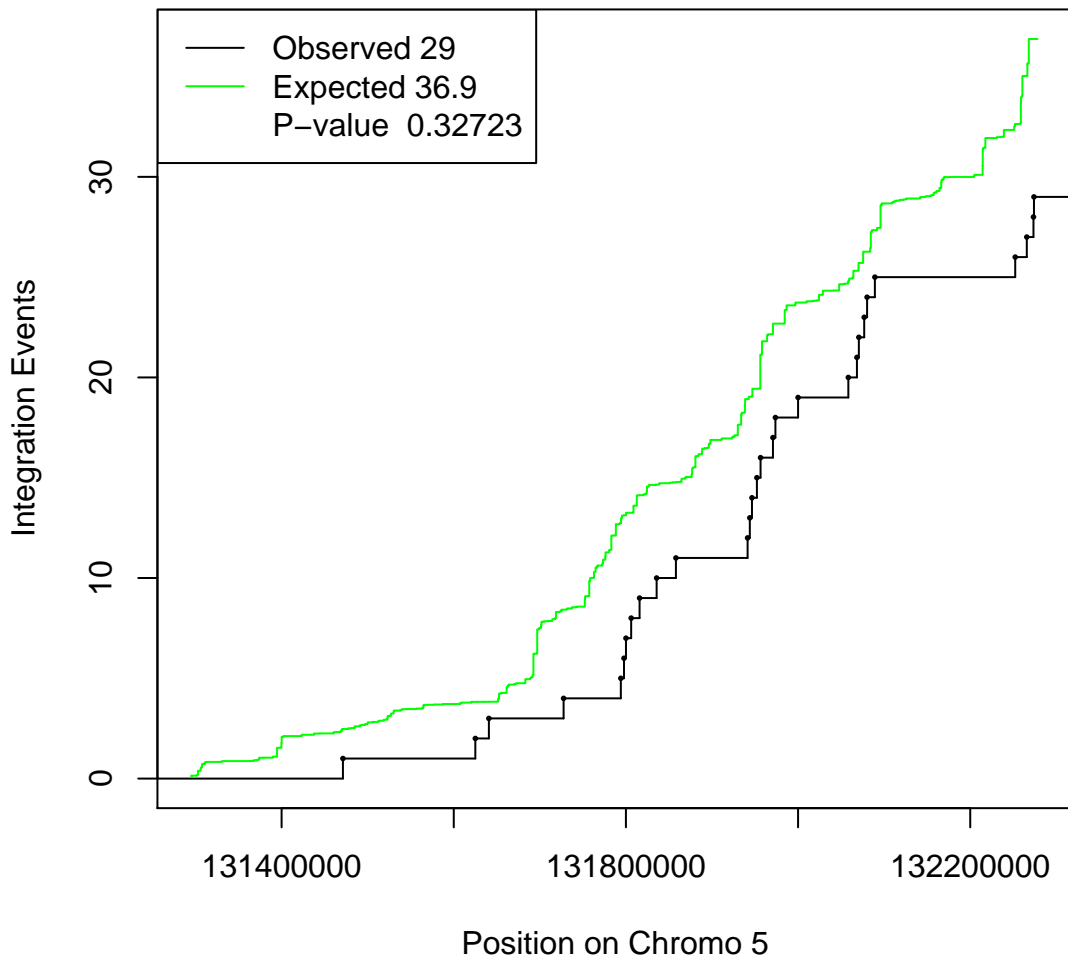

## ENCODE Region: ENm003

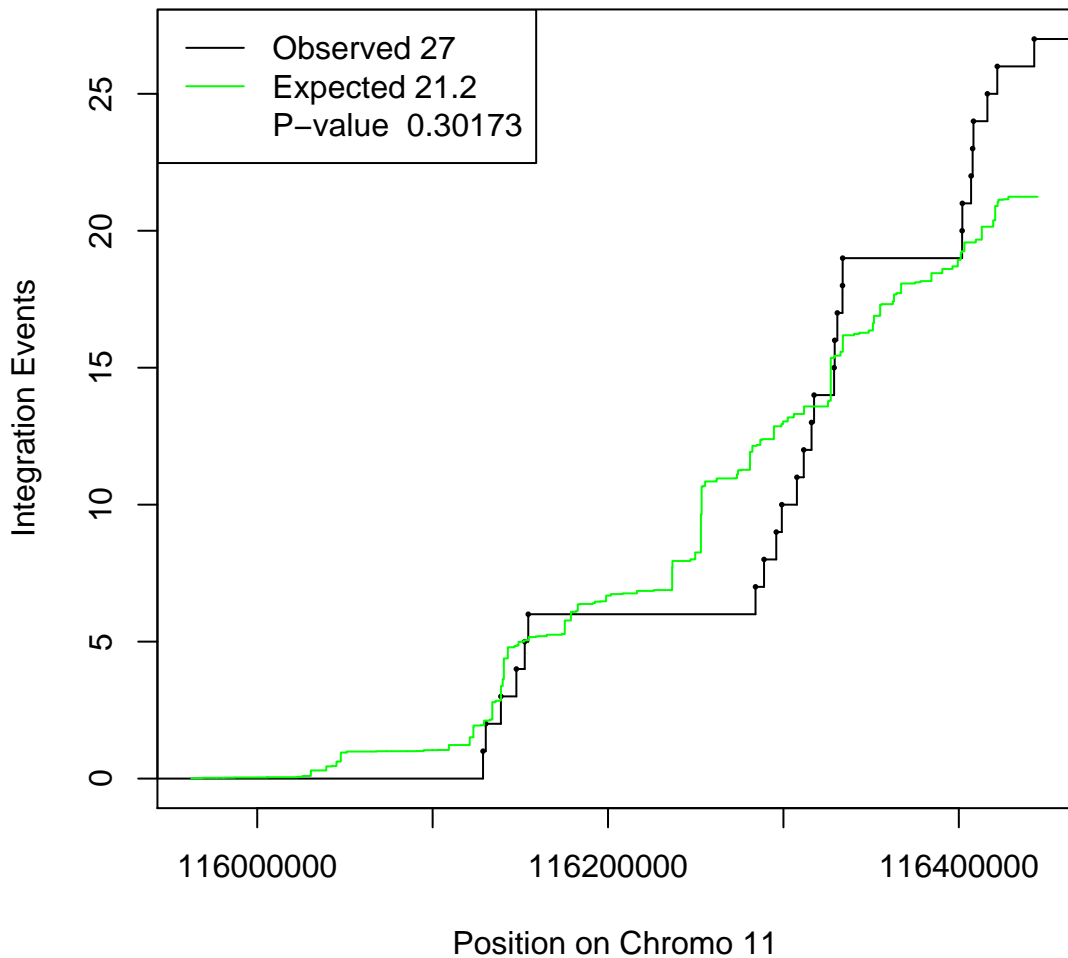

## ENCODE Region: ENm004

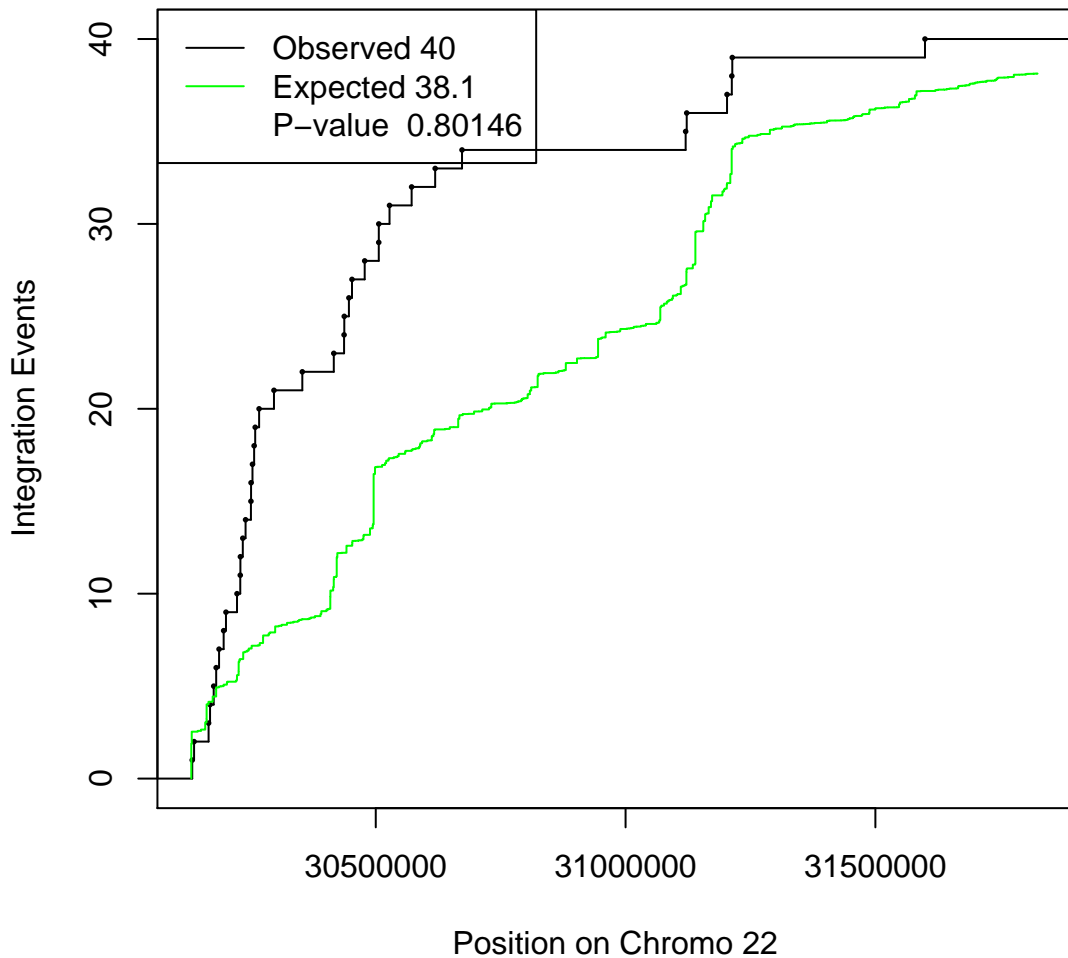

## ENCODE Region: ENm005

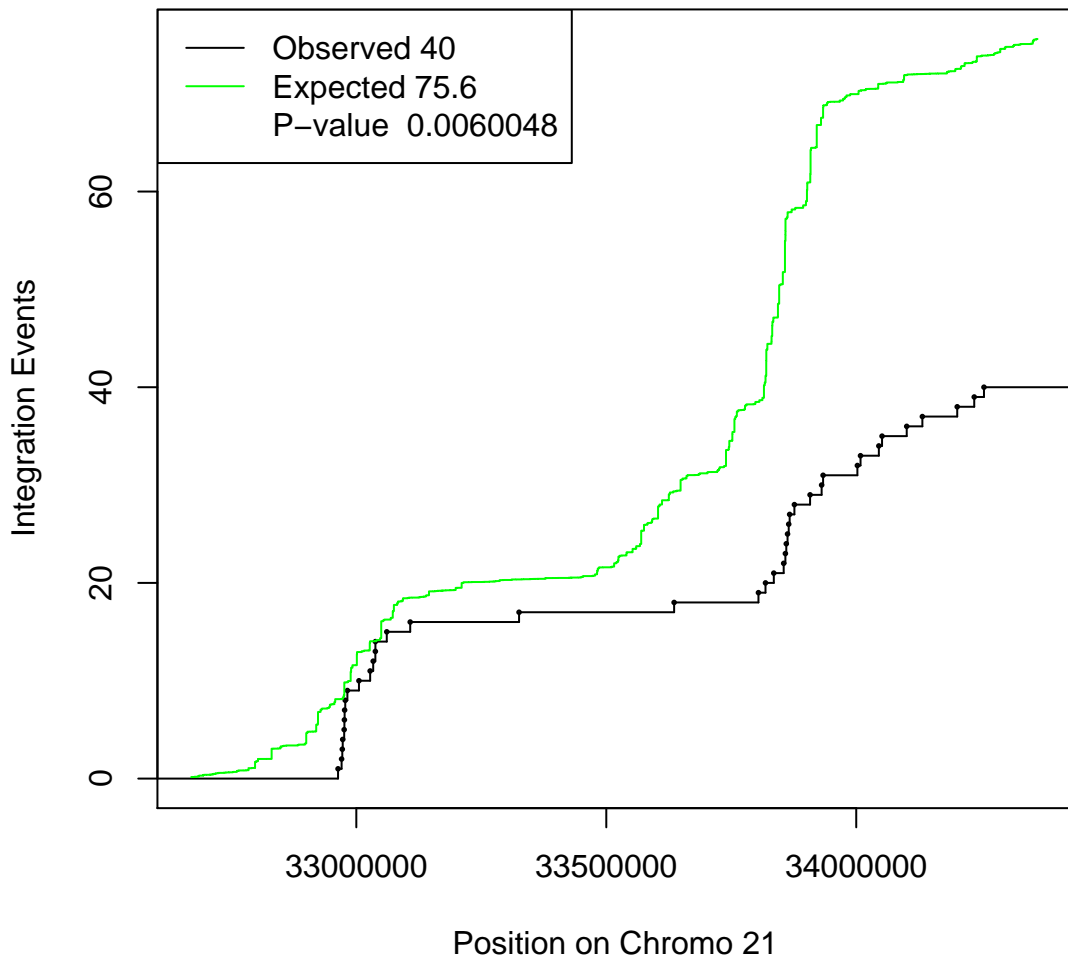

## ENCODE Region: ENm006

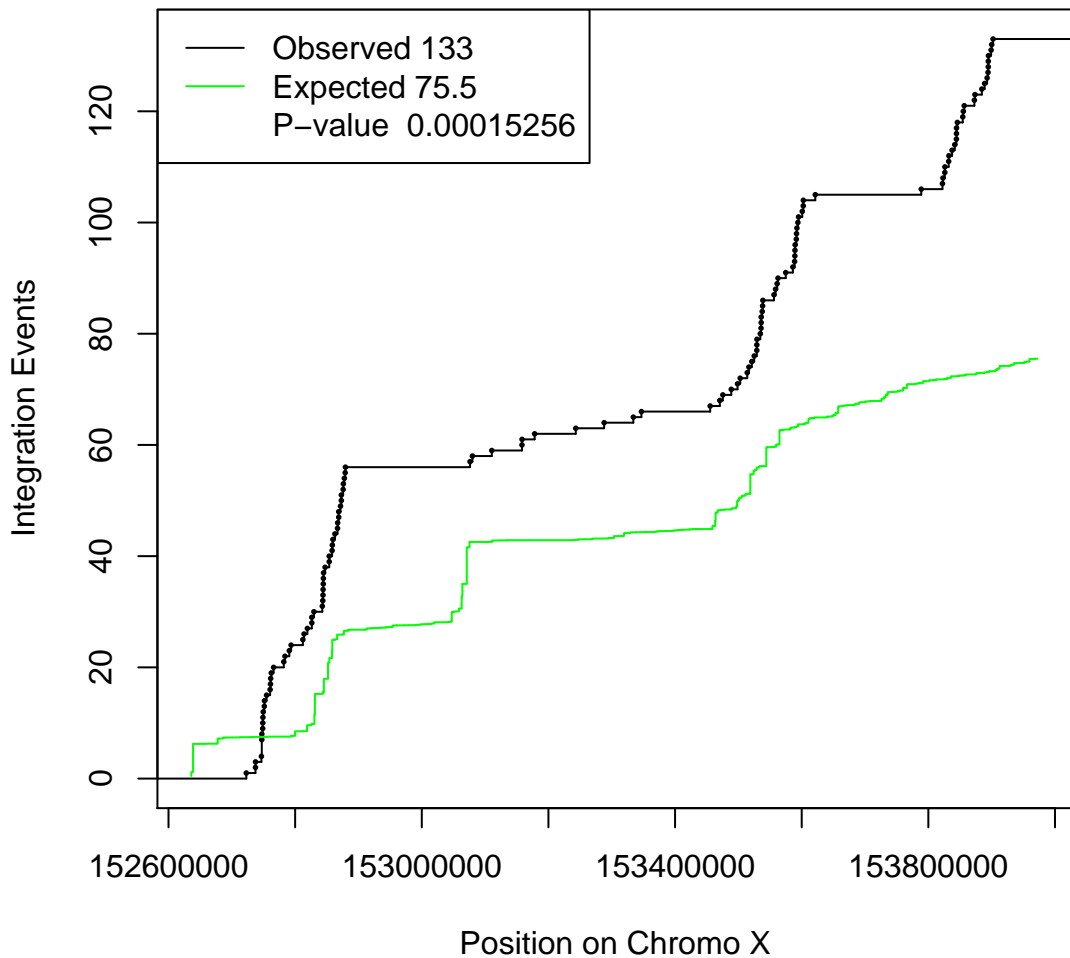

## ENCODE Region: ENm007

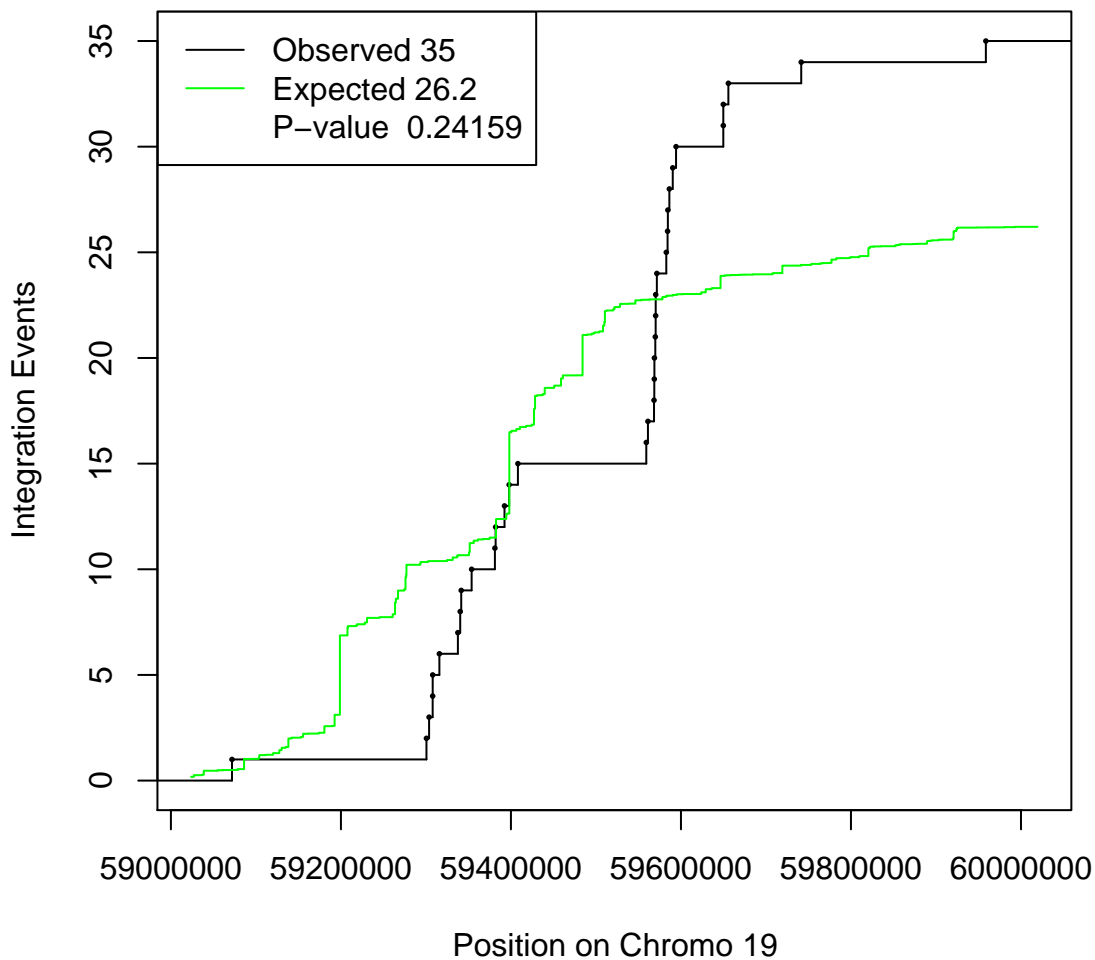

## ENCODE Region: ENm008

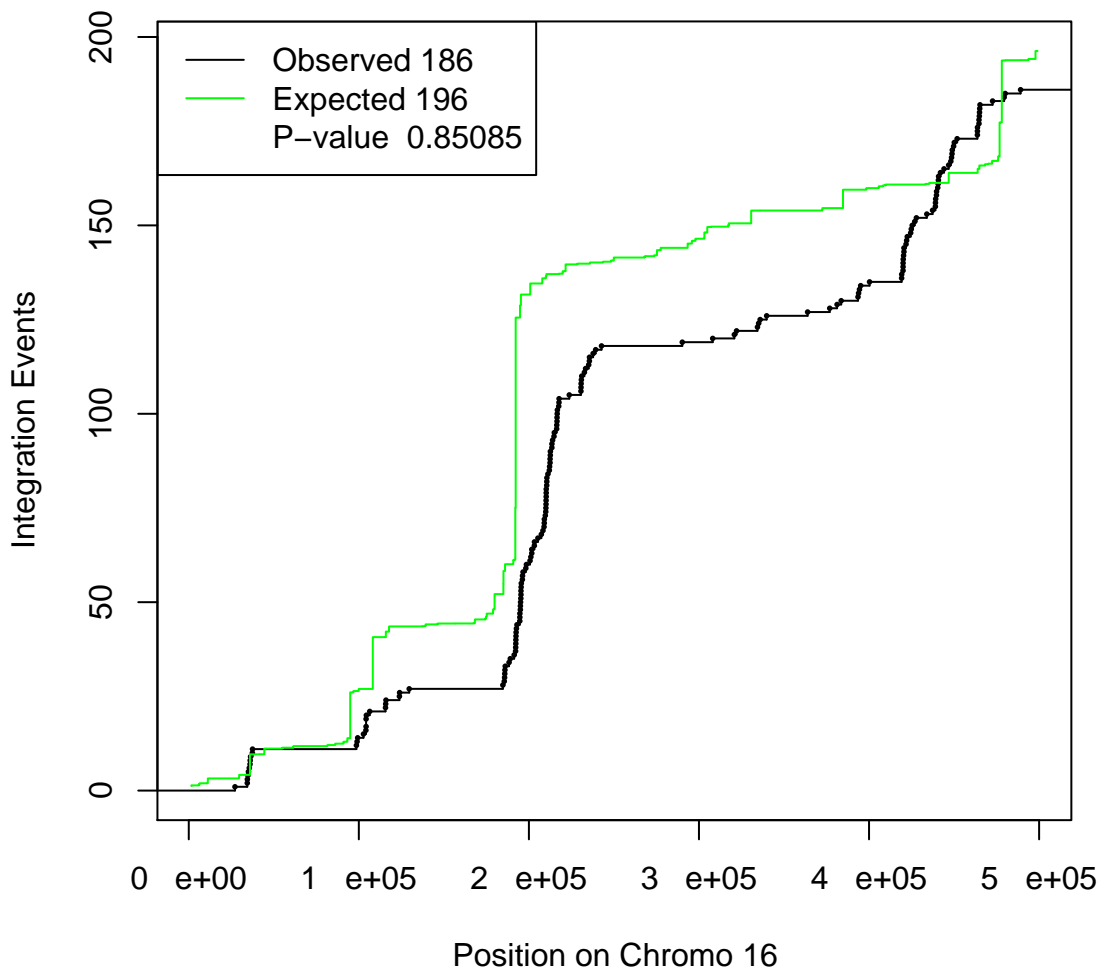



## ENCODE Region: ENm009

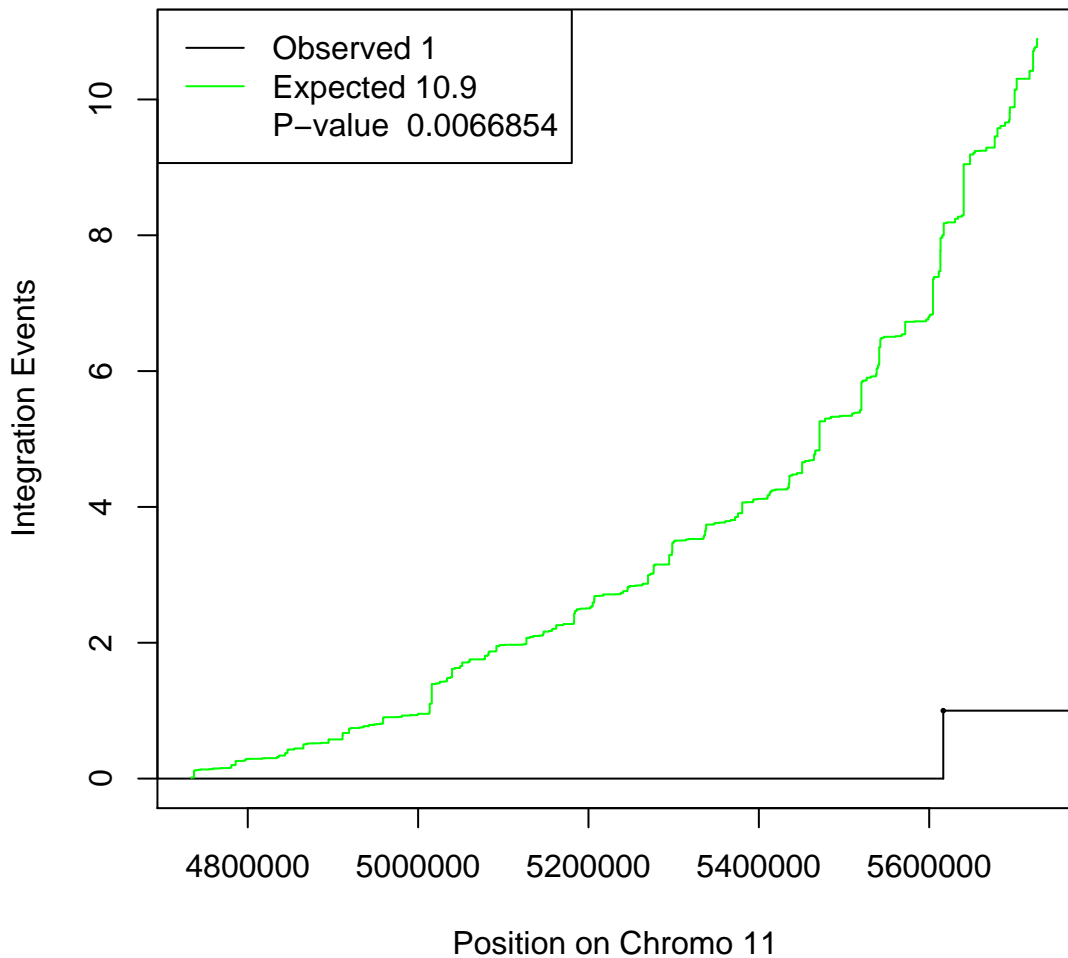

## ENCODE Region: ENm010

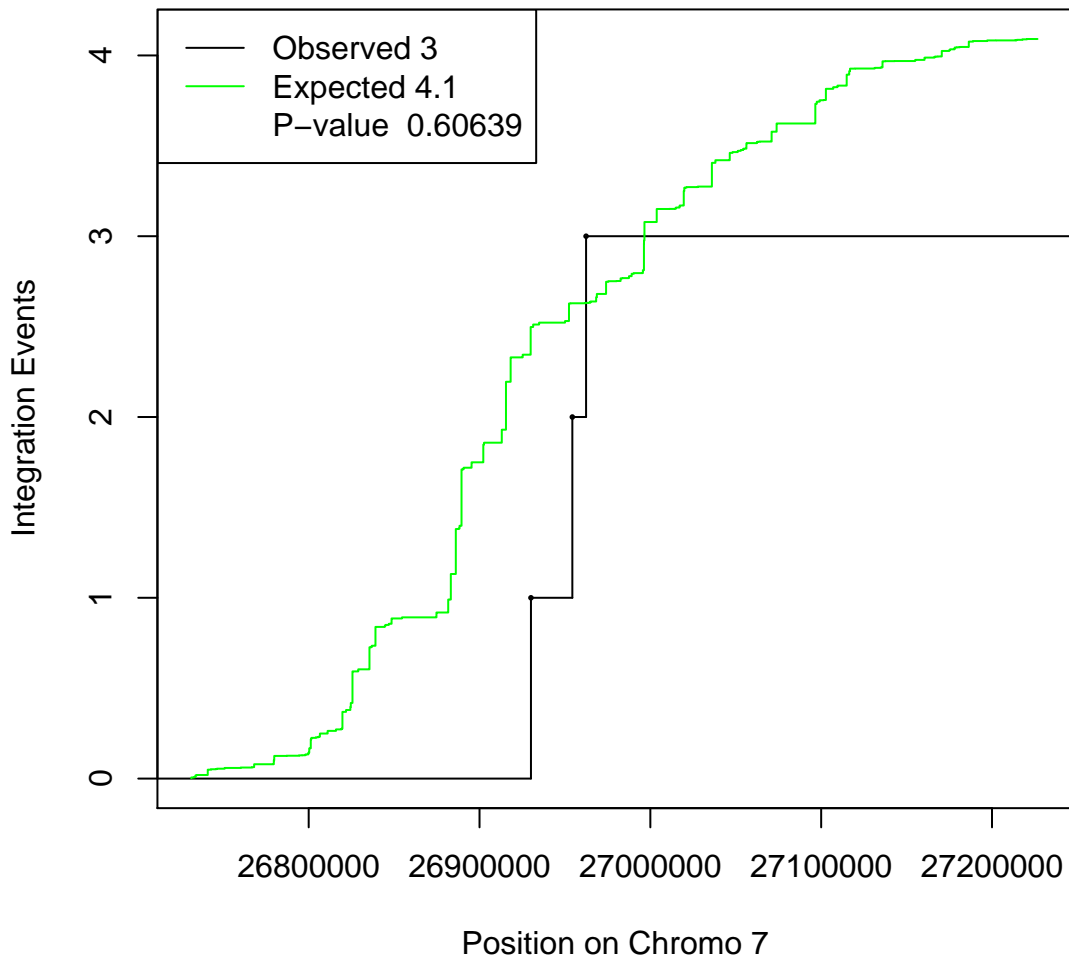

## ENCODE Region: ENm011

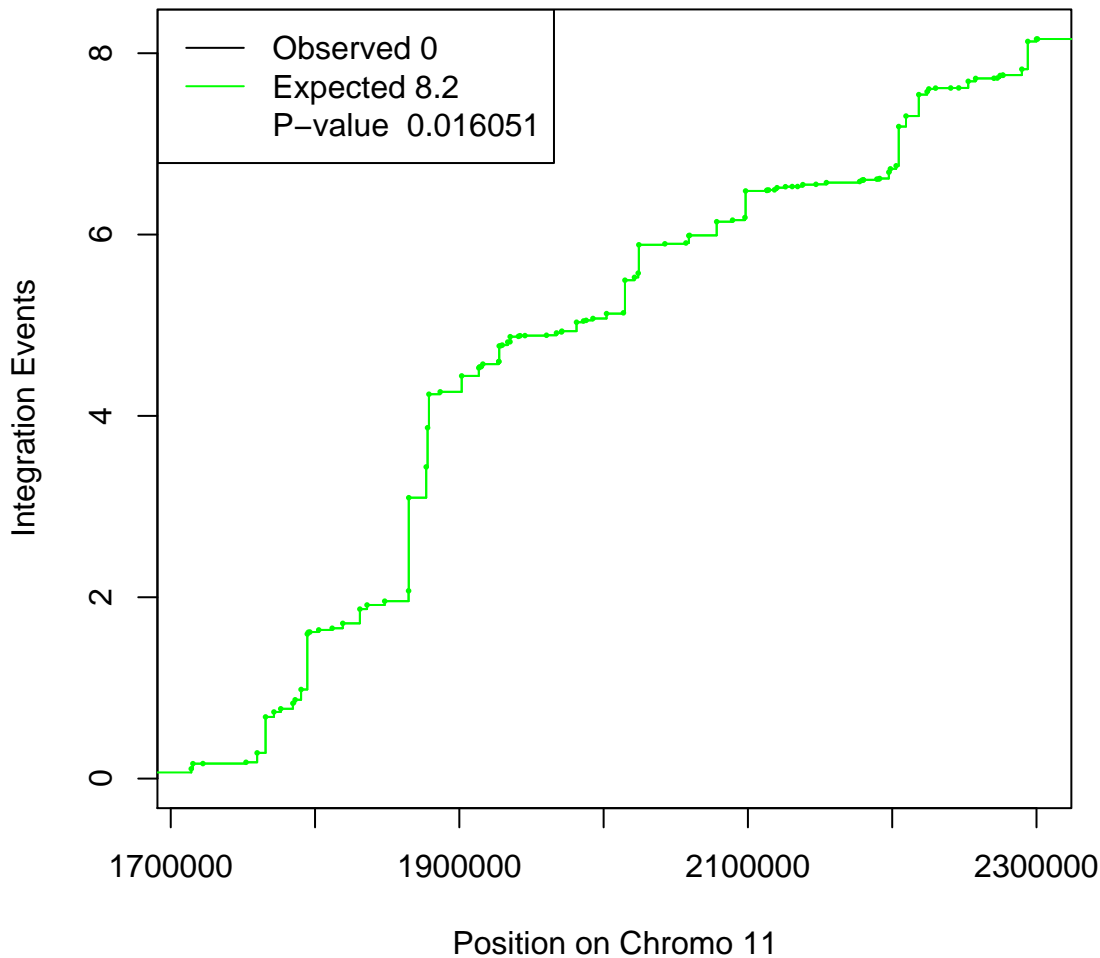

## ENCODE Region: ENm012

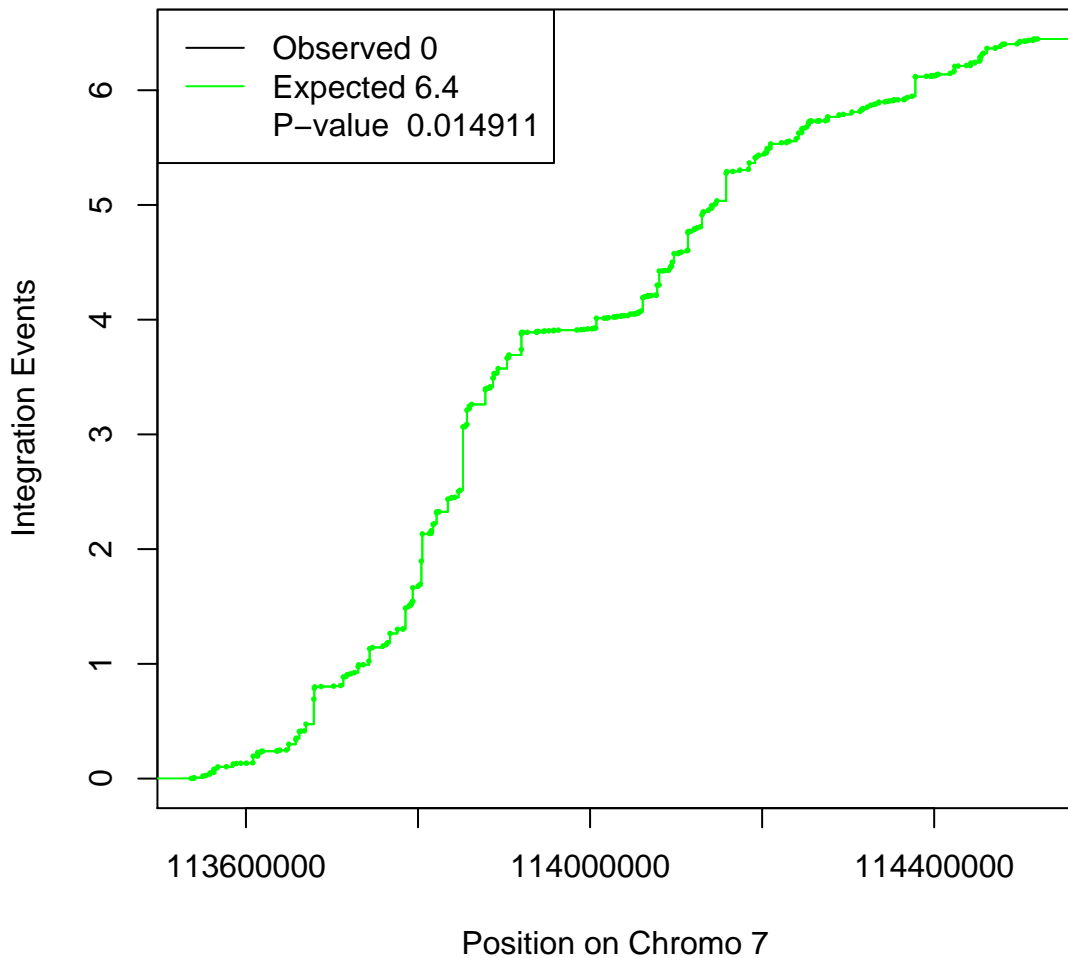

## ENCODE Region: ENm013

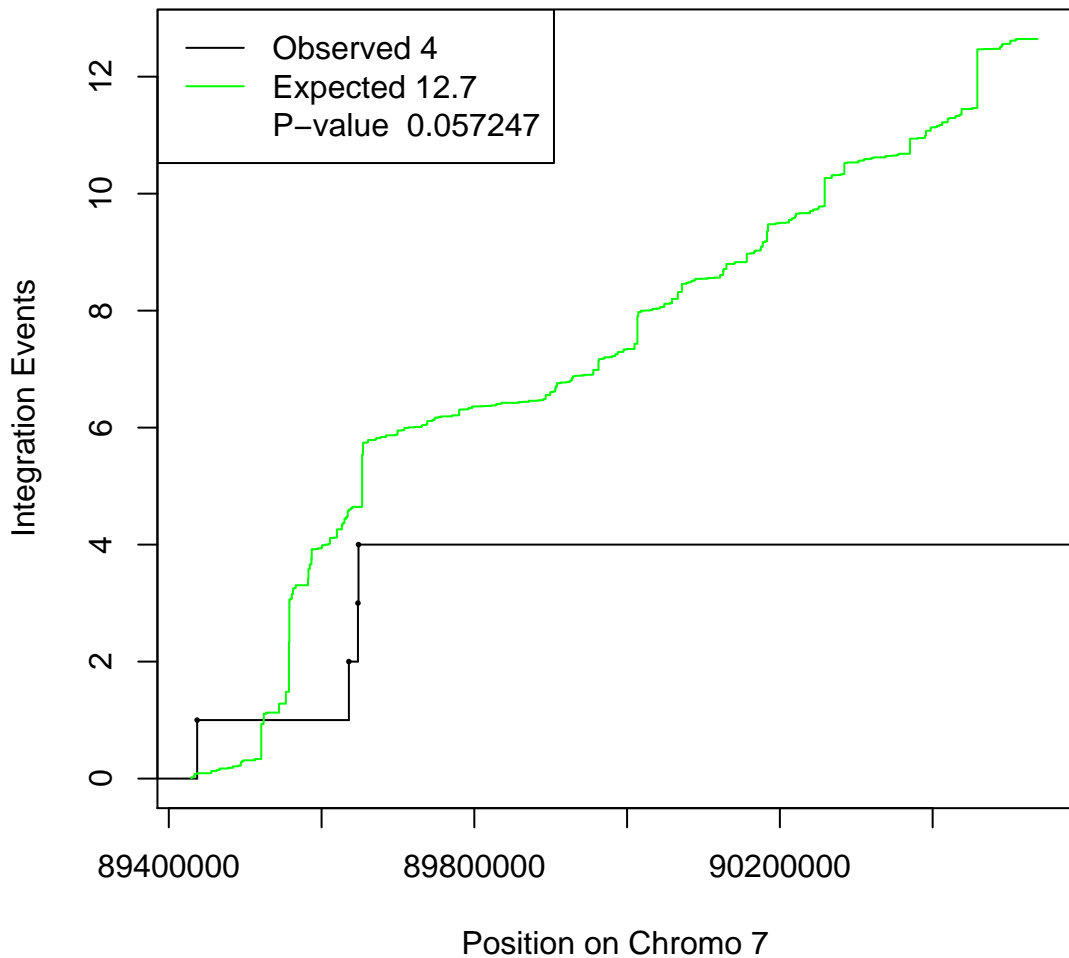

## ENCODE Region: ENm014

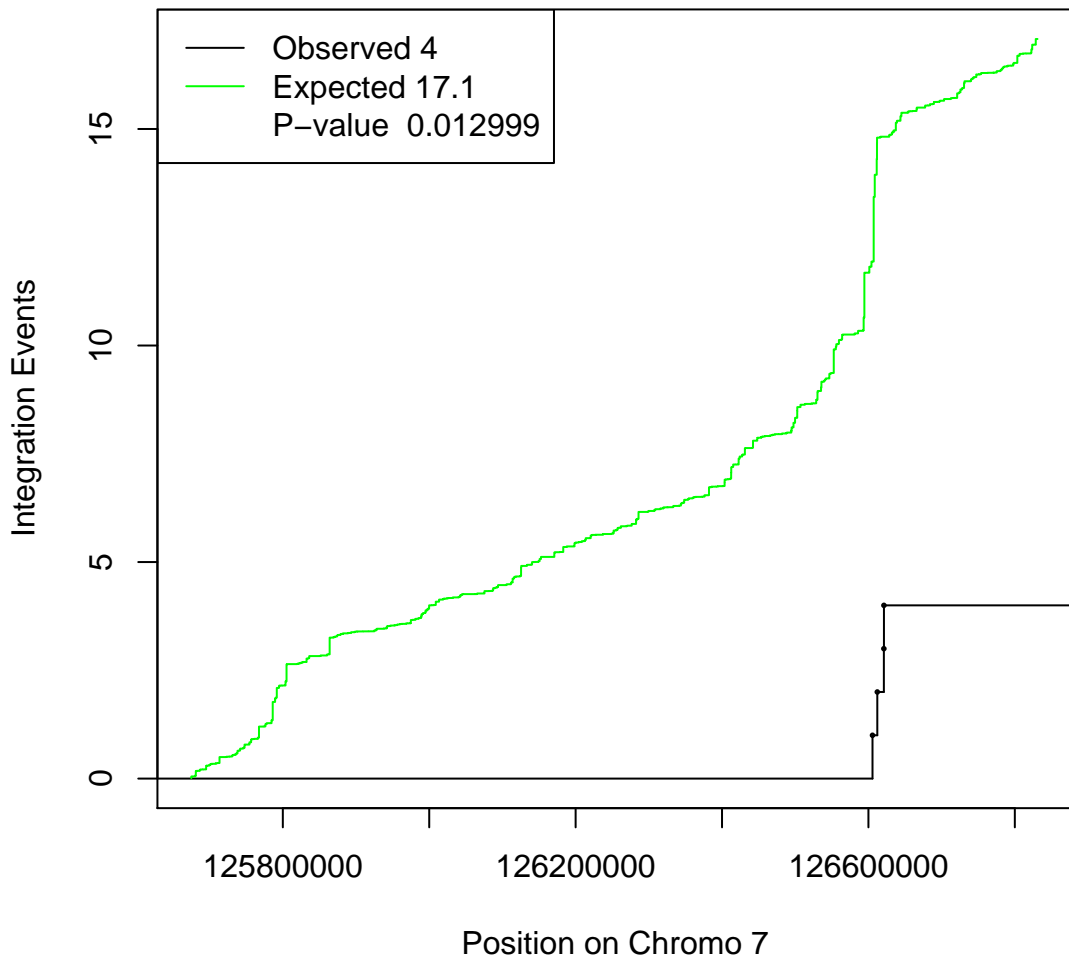

## ENCODE Region: ENr111

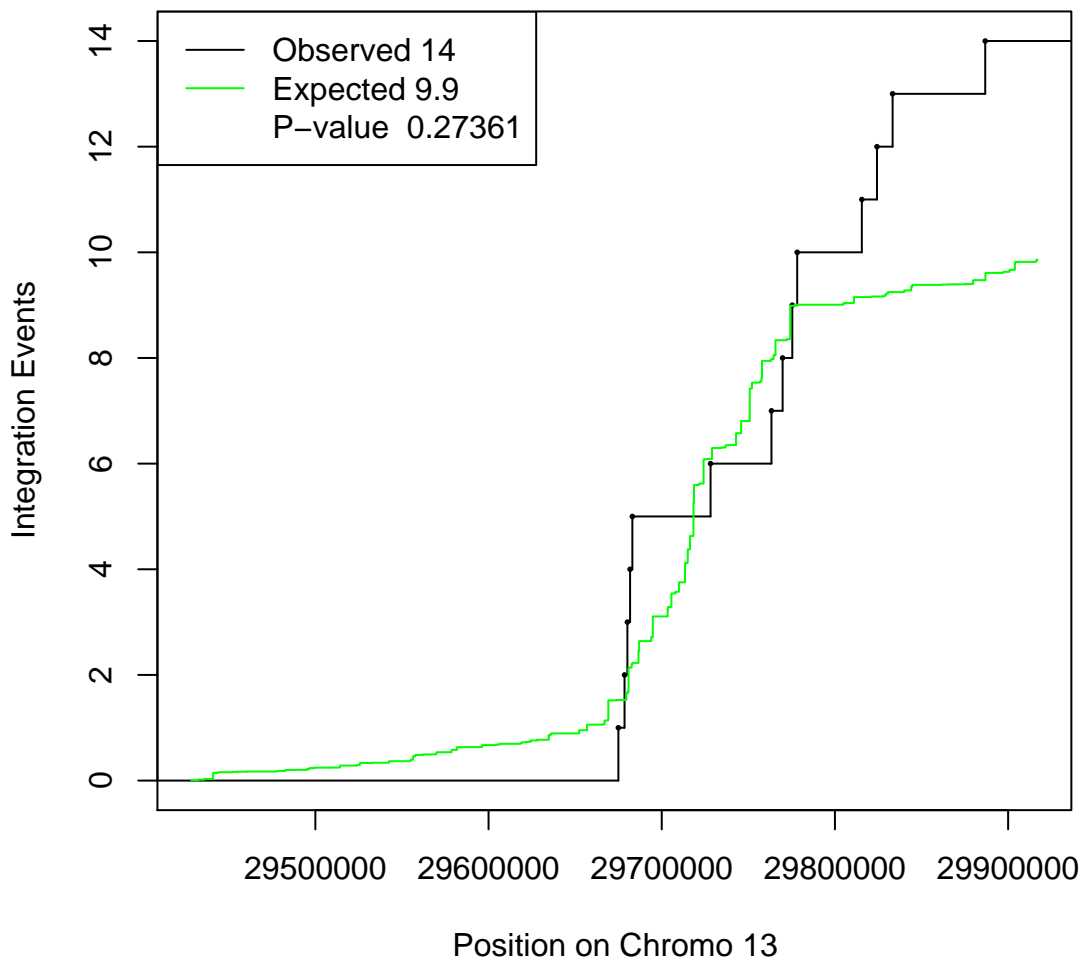

## ENCODE Region: ENr112

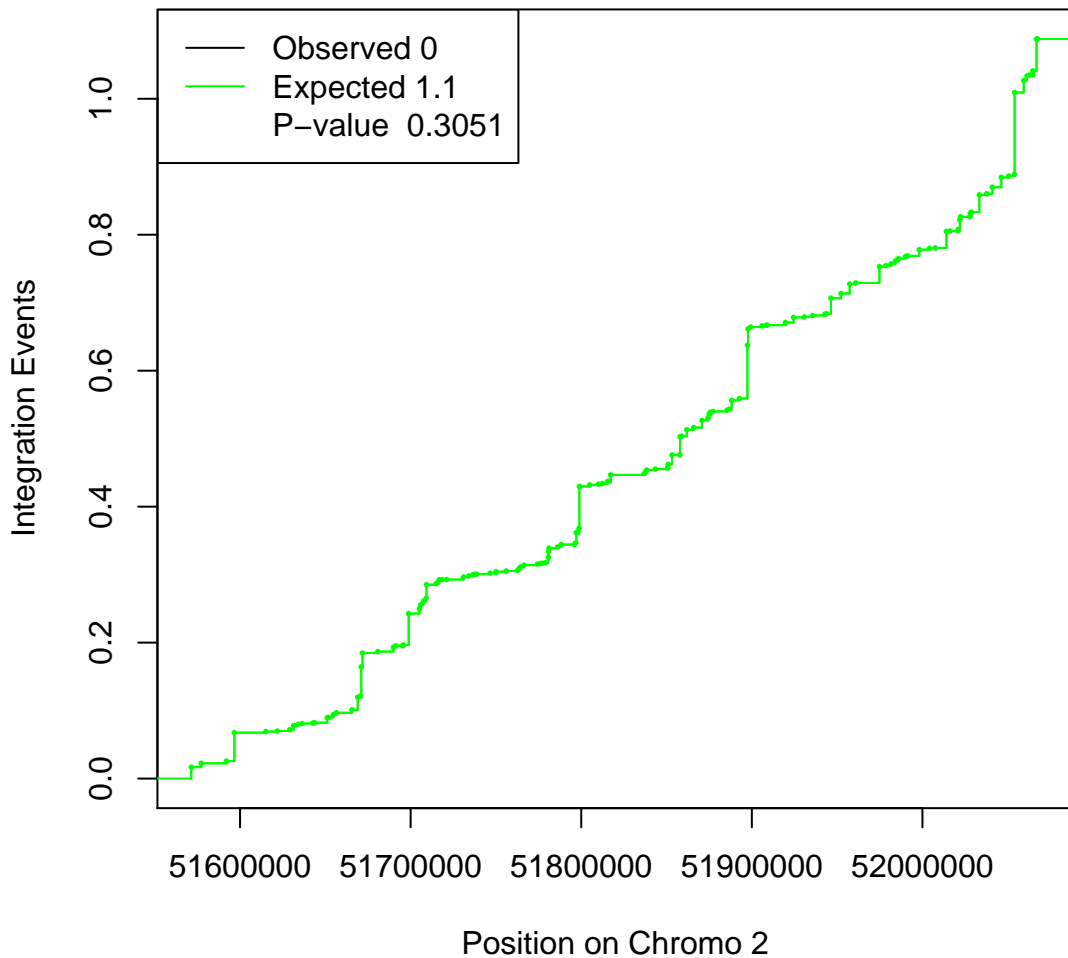



# ENCODE Region: ENr113

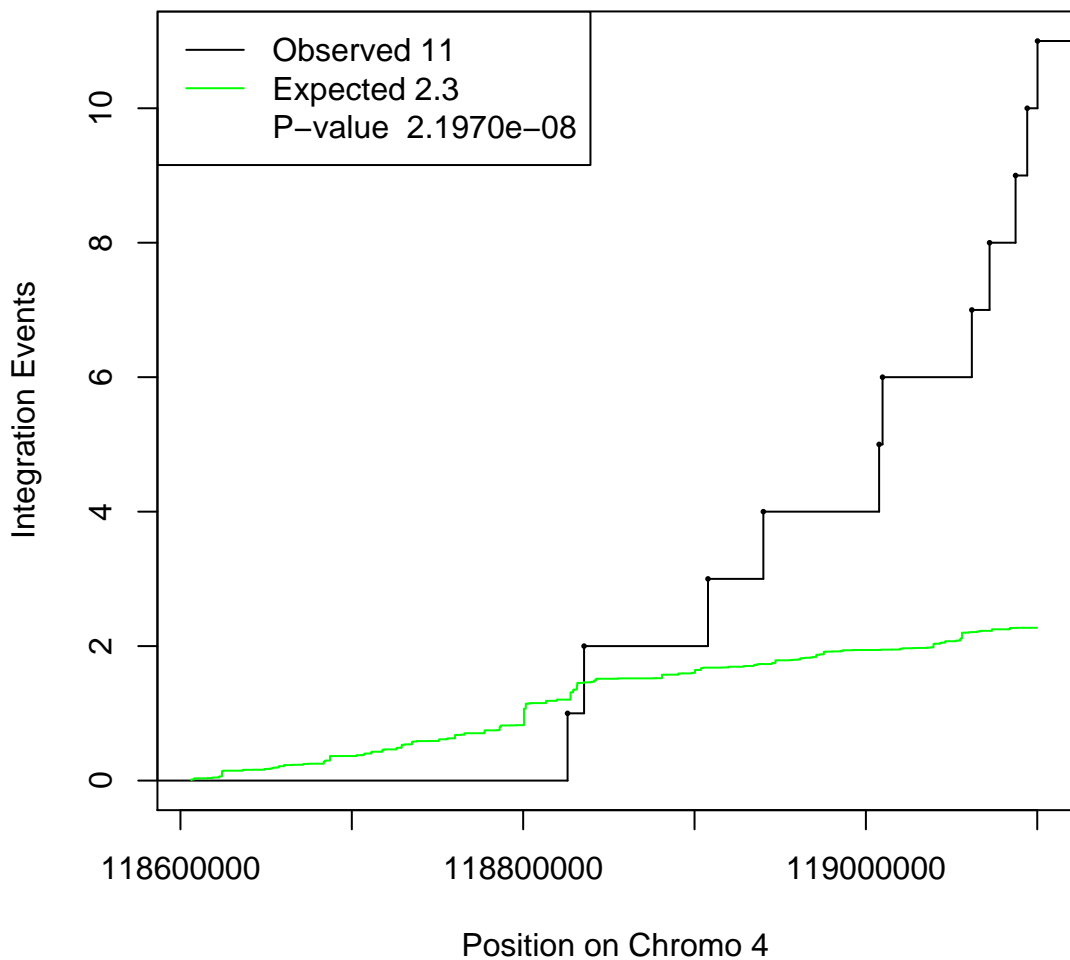

## ENCODE Region: ENr114

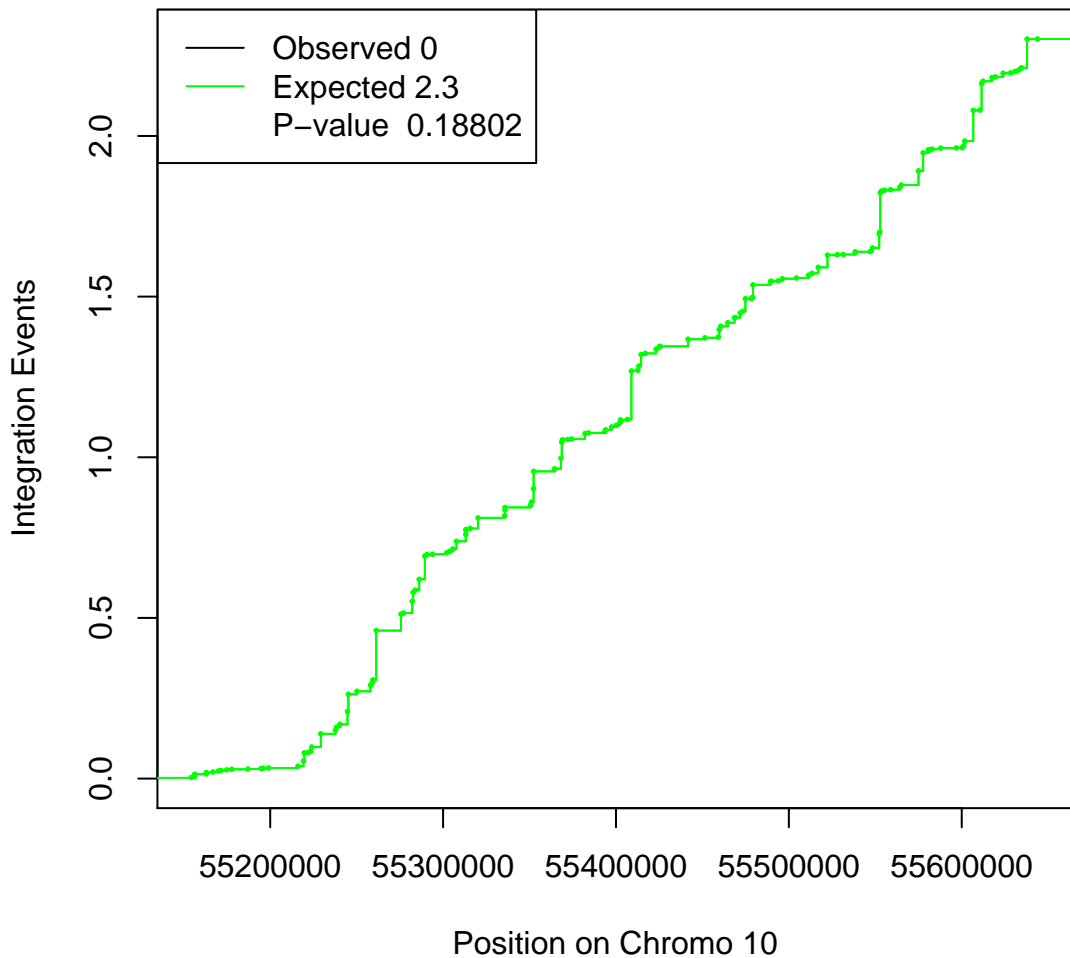

## ENCODE Region: ENr121

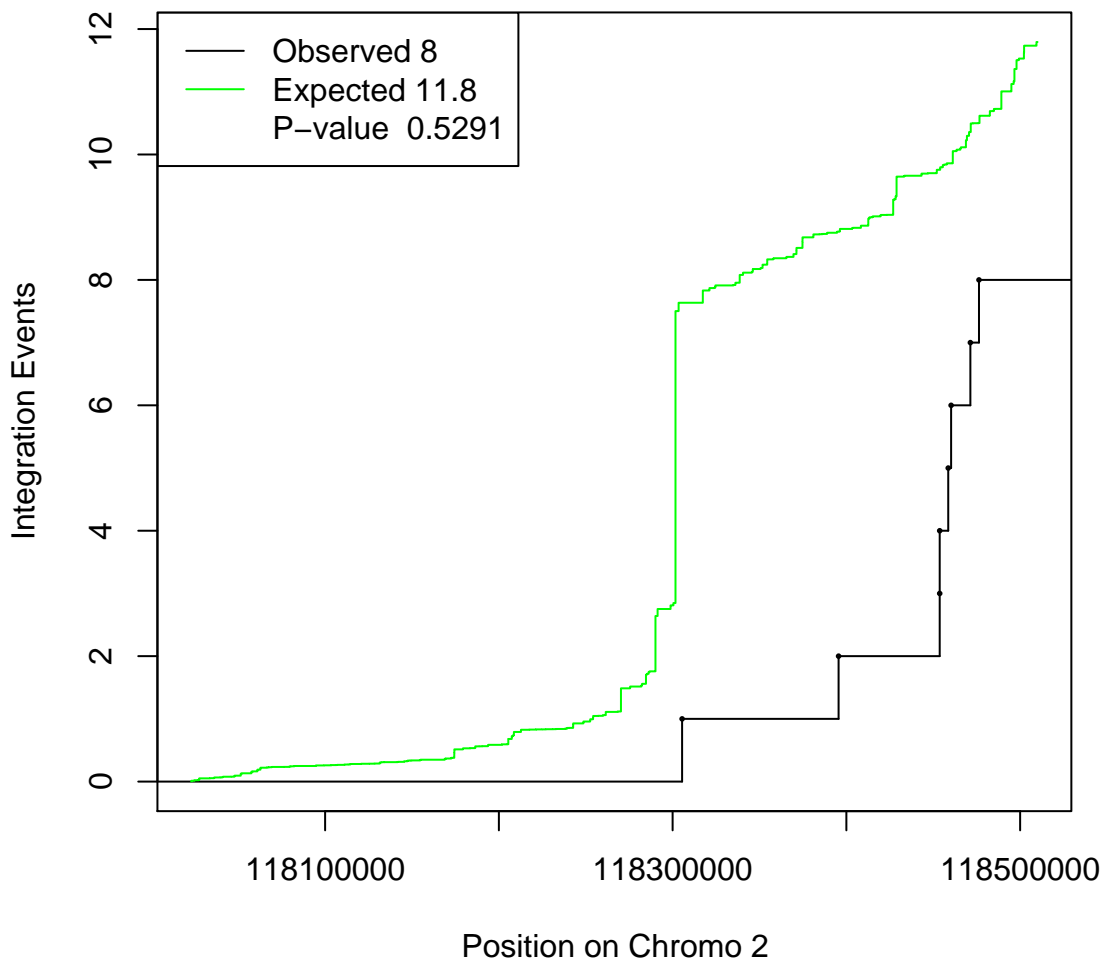

## ENCODE Region: ENr122

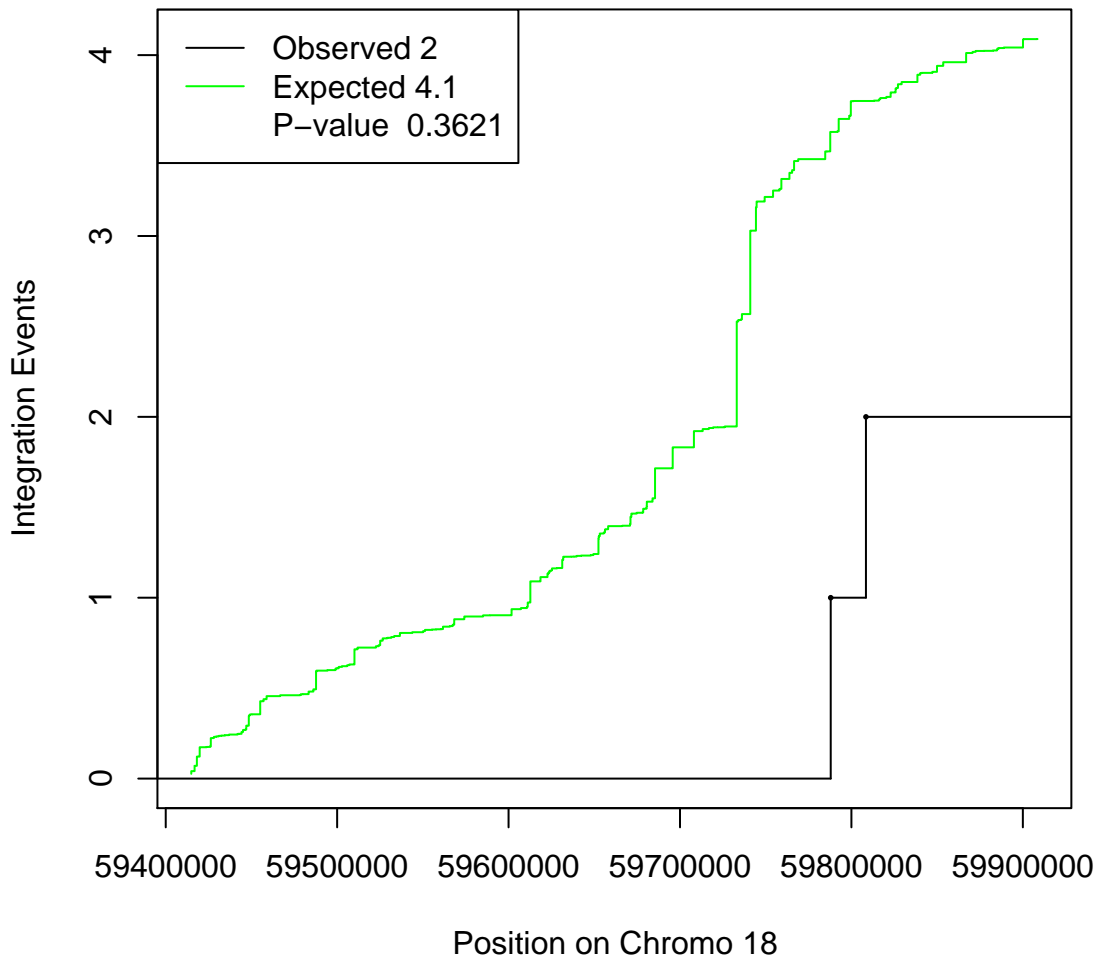

## ENCODE Region: ENr123

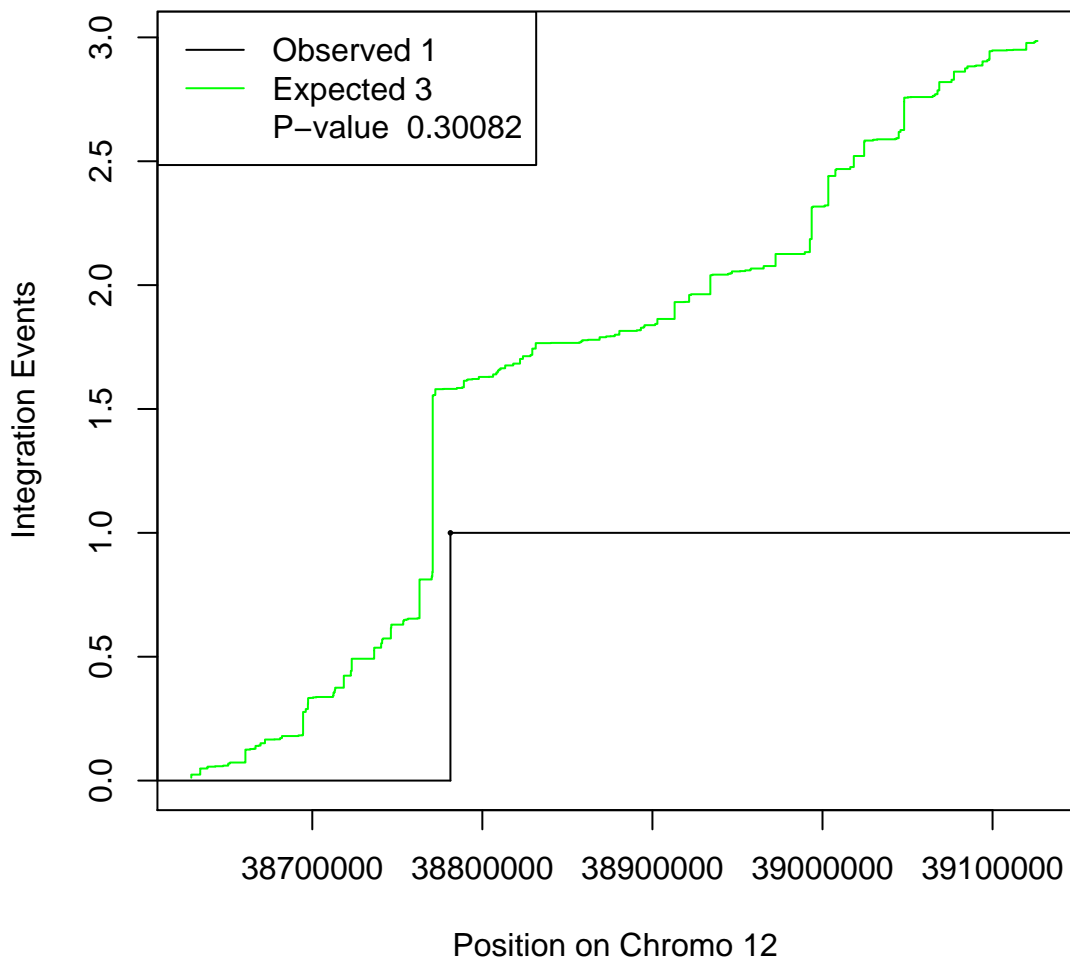

## ENCODE Region: ENr131

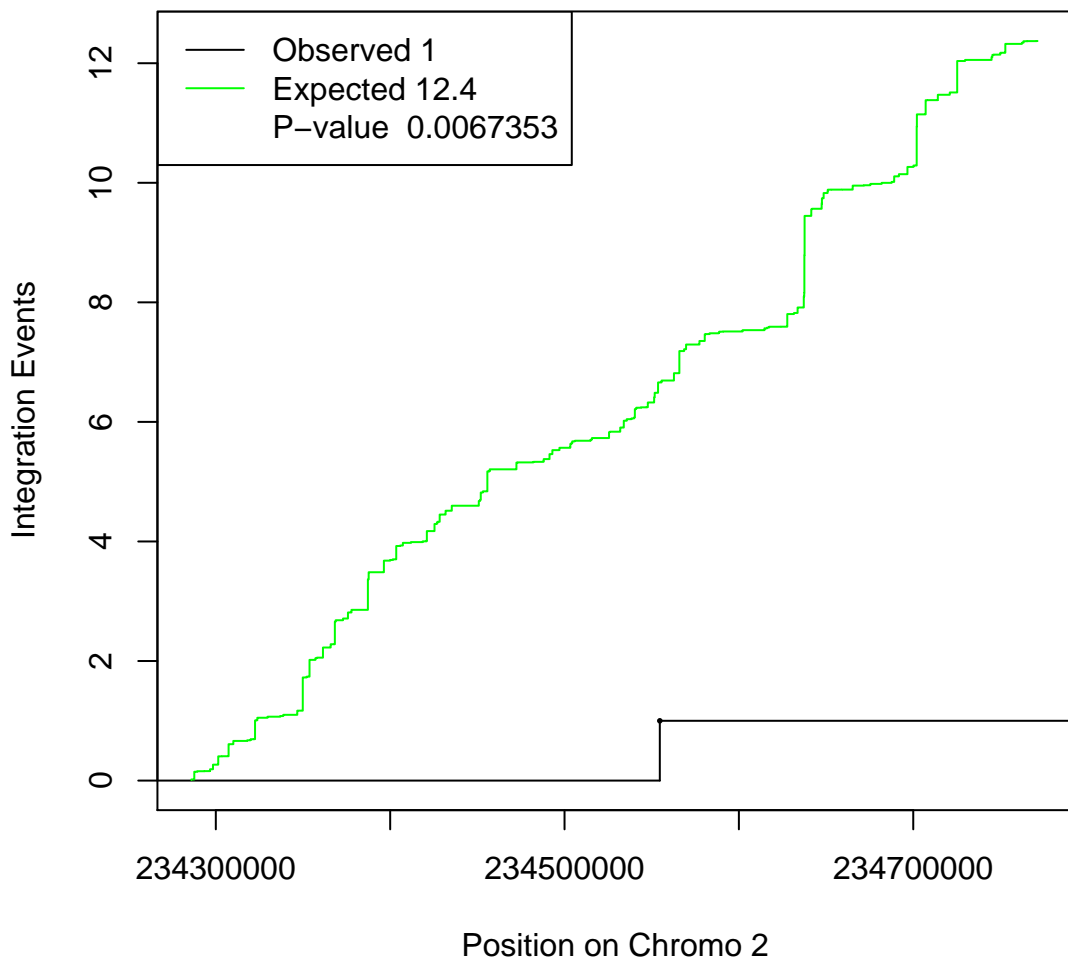

## ENCODE Region: ENr132

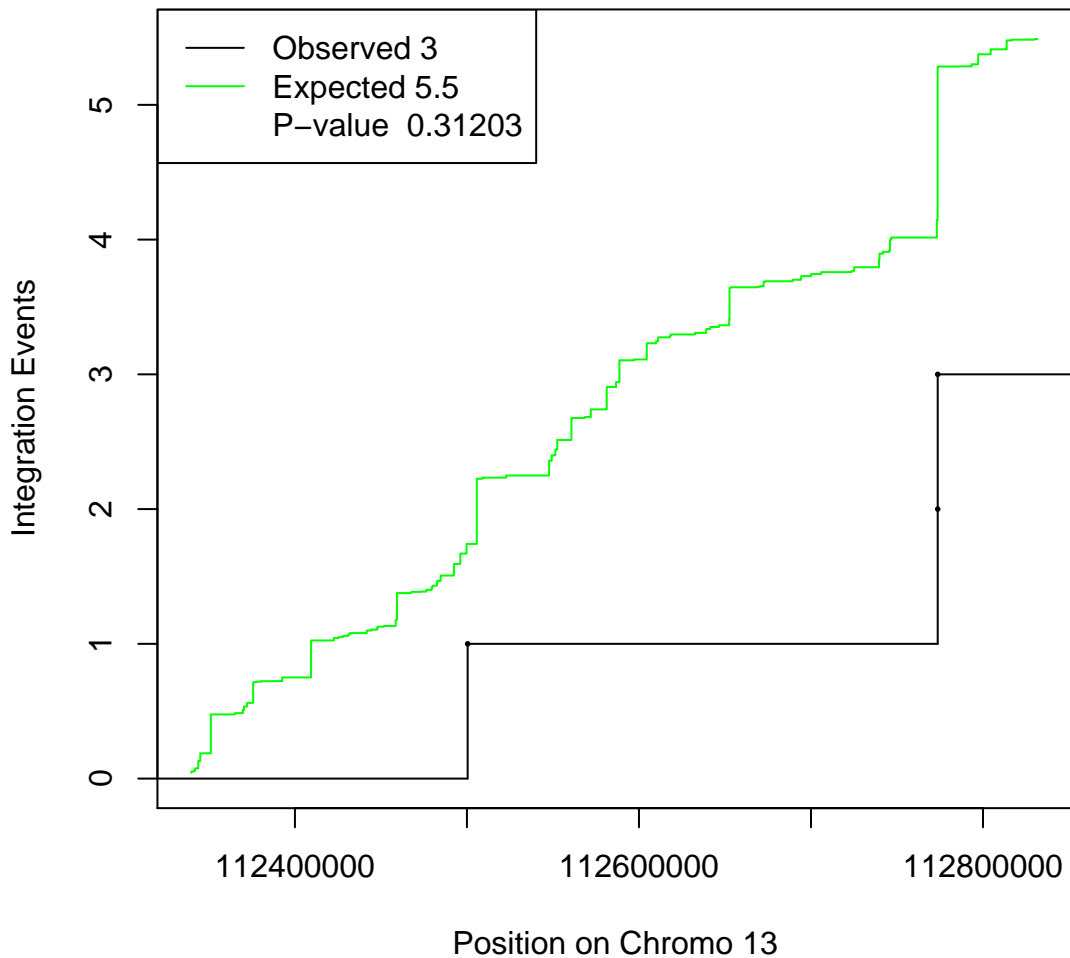

## ENCODE Region: ENr133

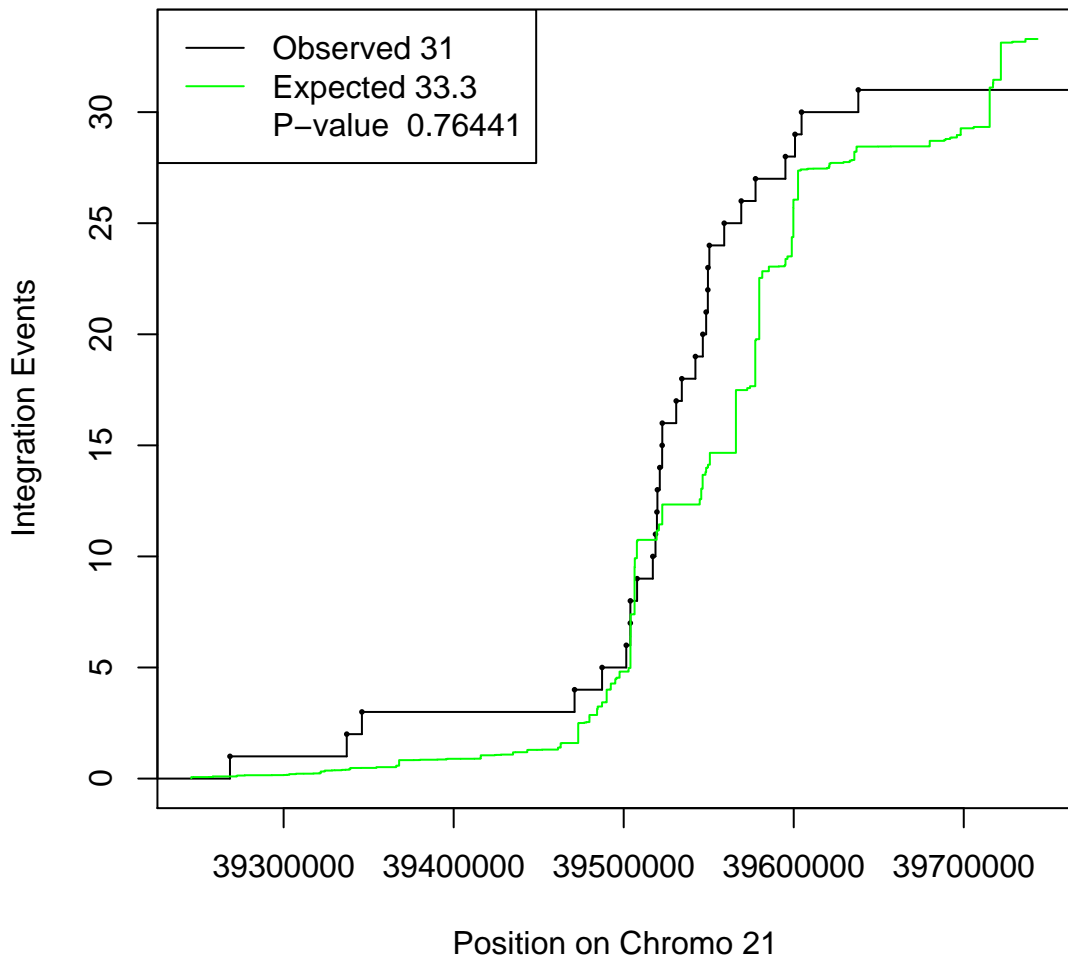



## ENCODE Region: ENr211

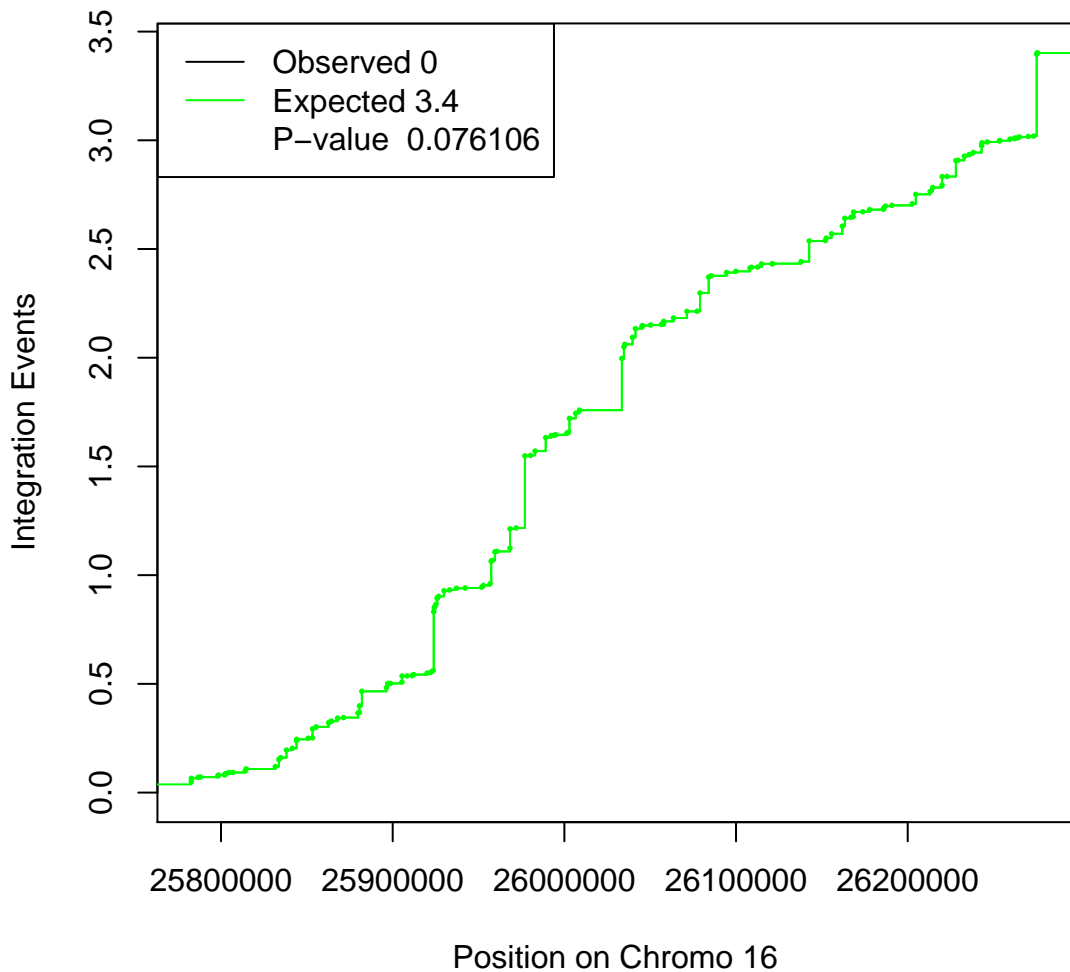

## ENCODE Region: ENr212

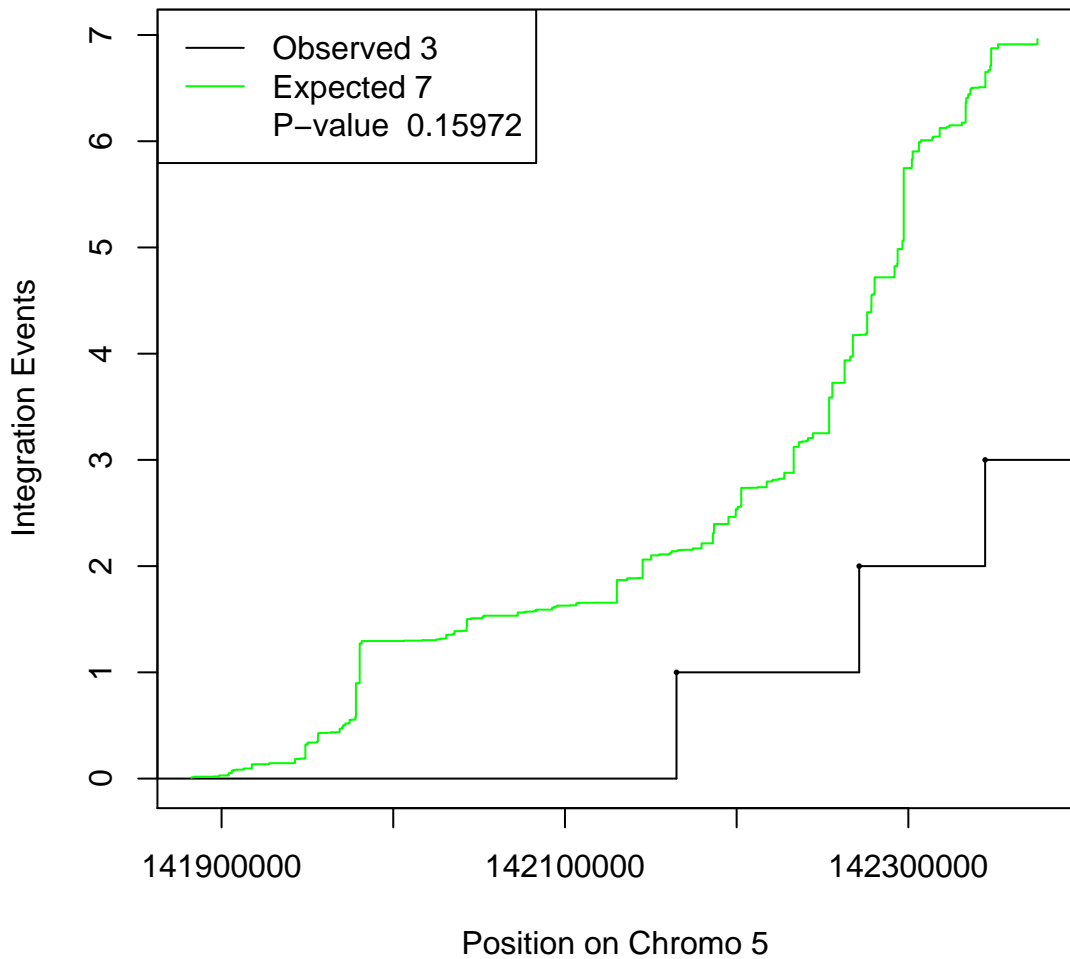

## ENCODE Region: ENr213

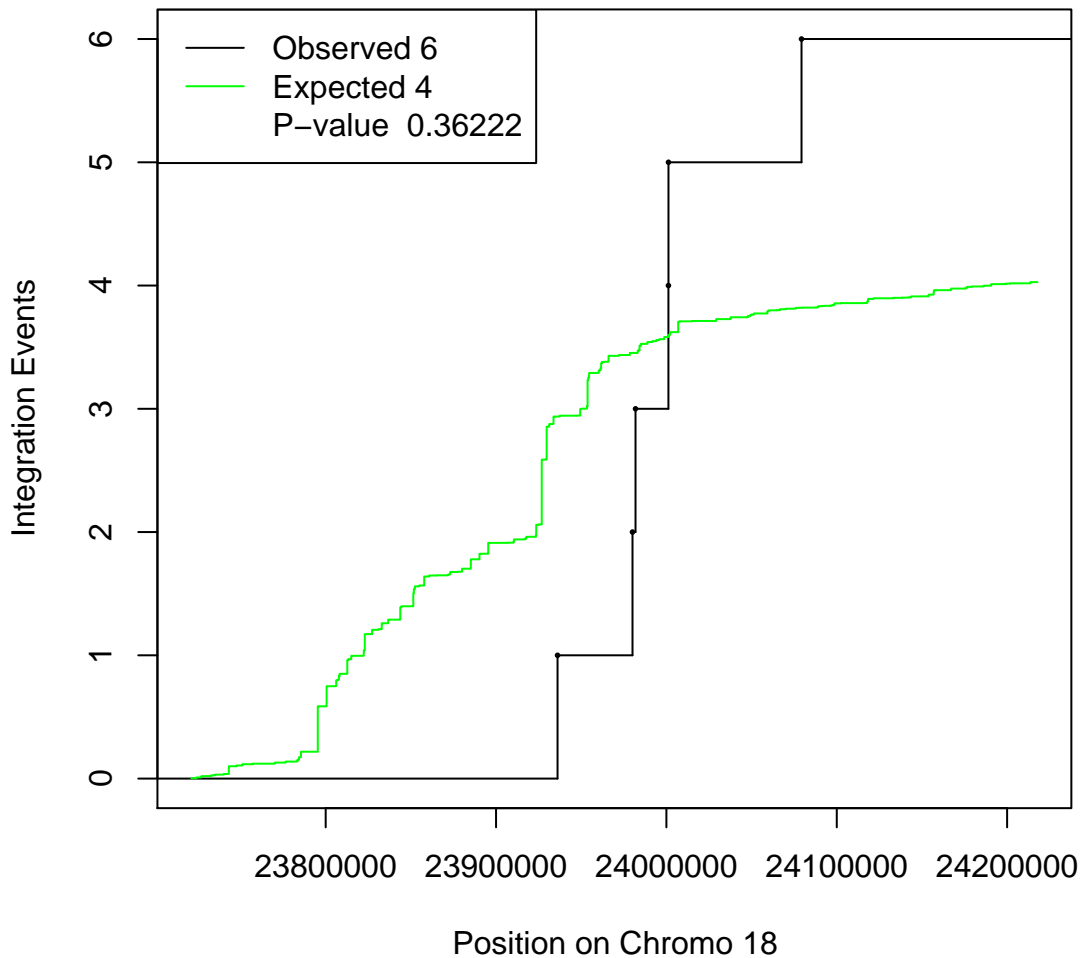

## ENCODE Region: ENr221

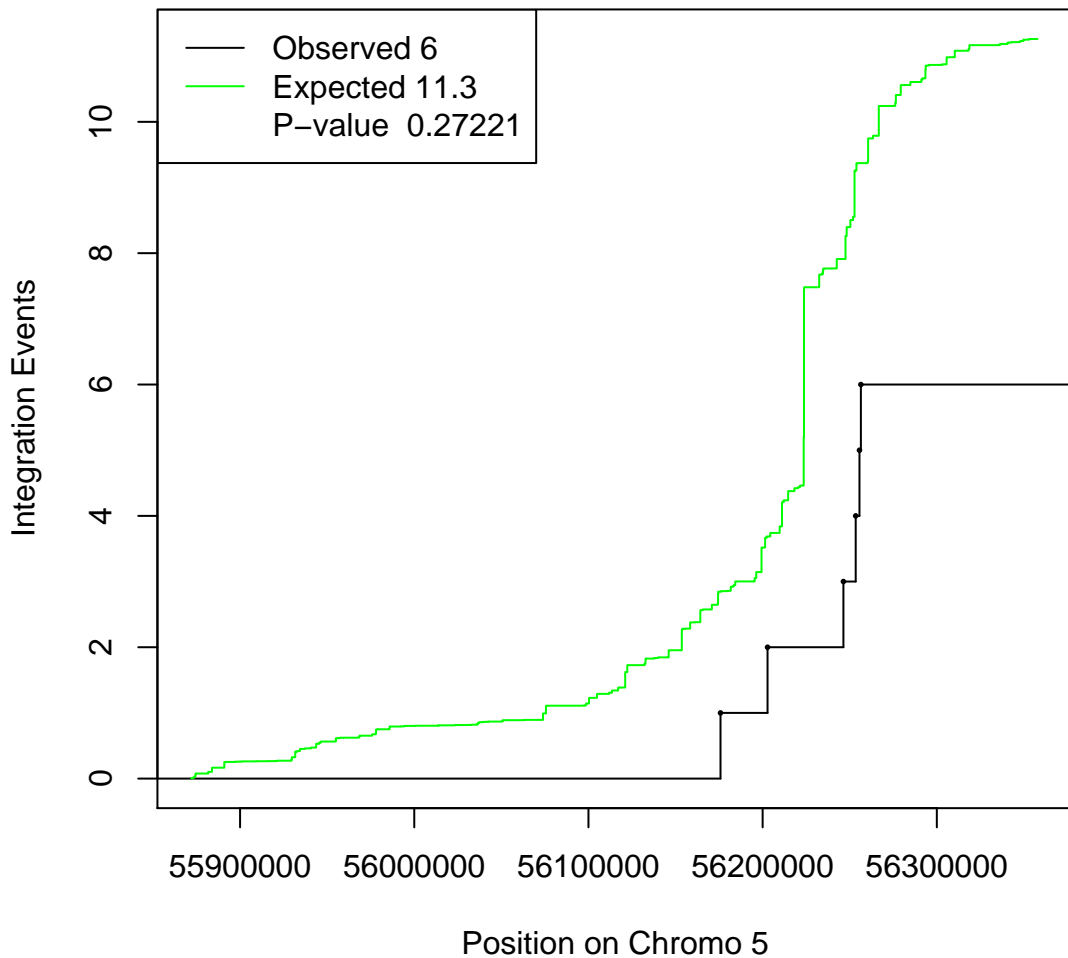

## ENCODE Region: ENr222

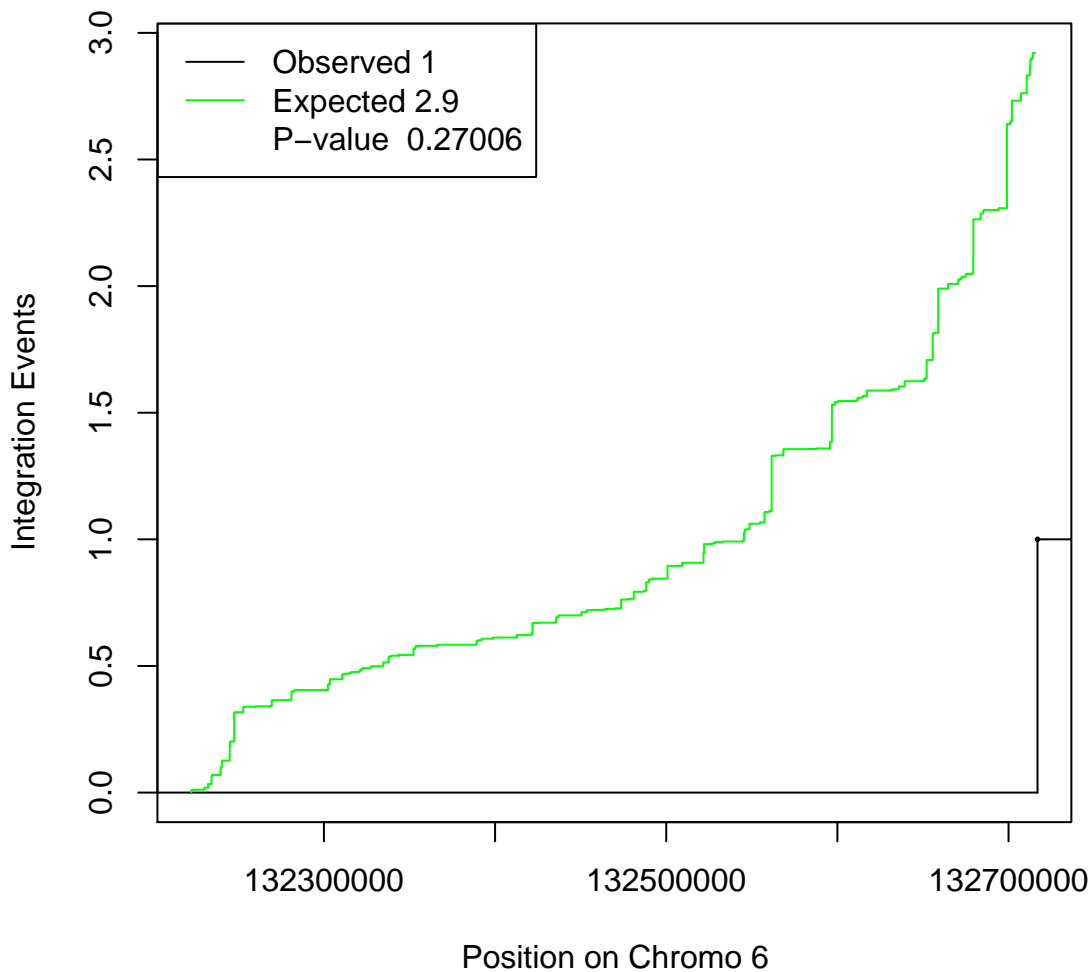

## ENCODE Region: ENr223

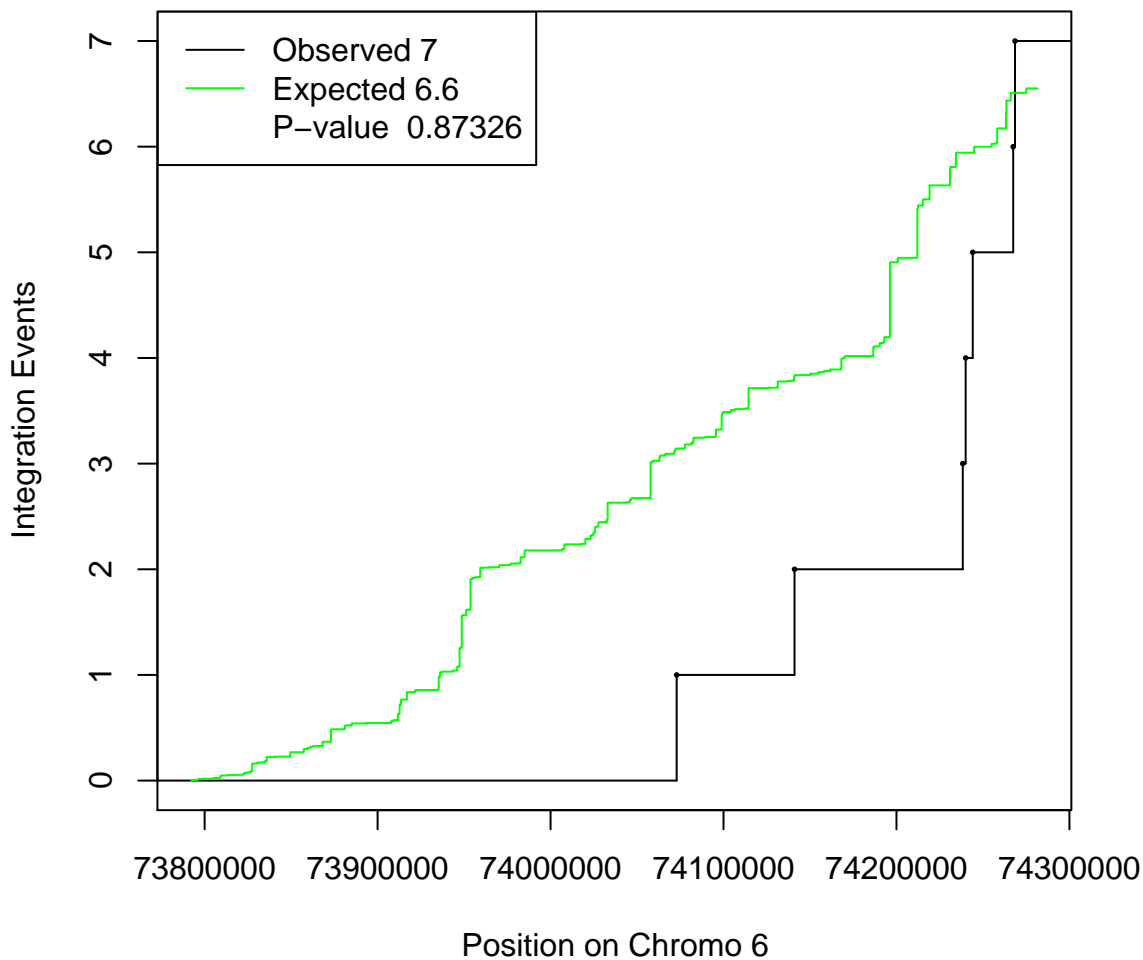

## ENCODE Region: ENr231

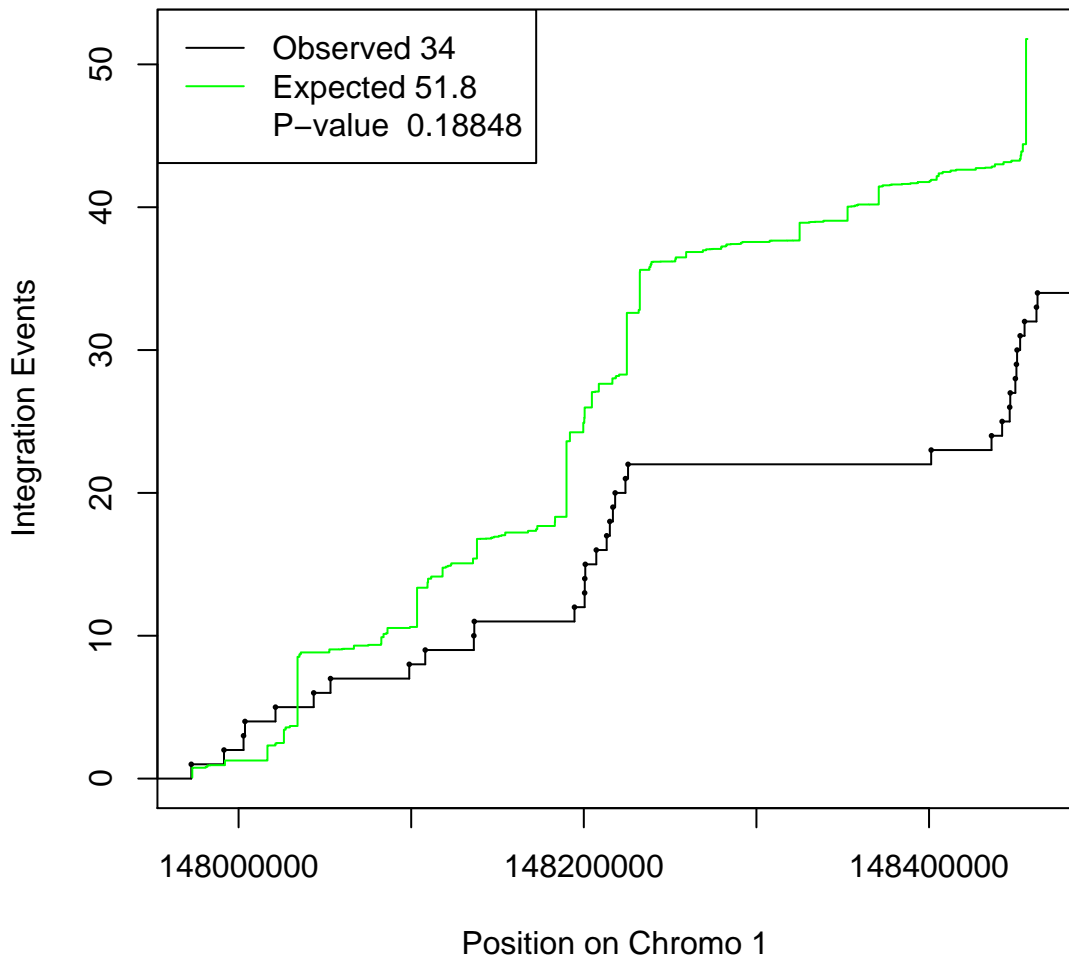

## ENCODE Region: ENr232

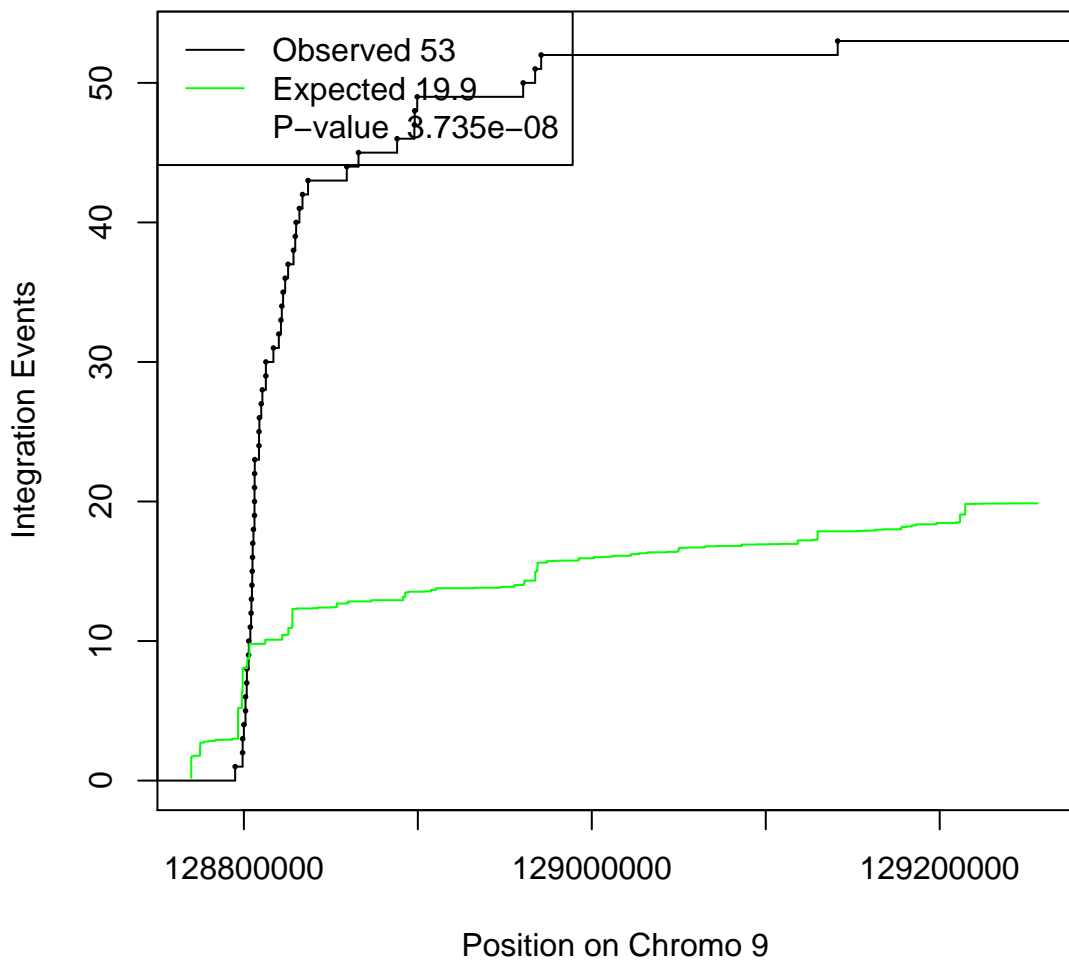



## ENCODE Region: ENr233

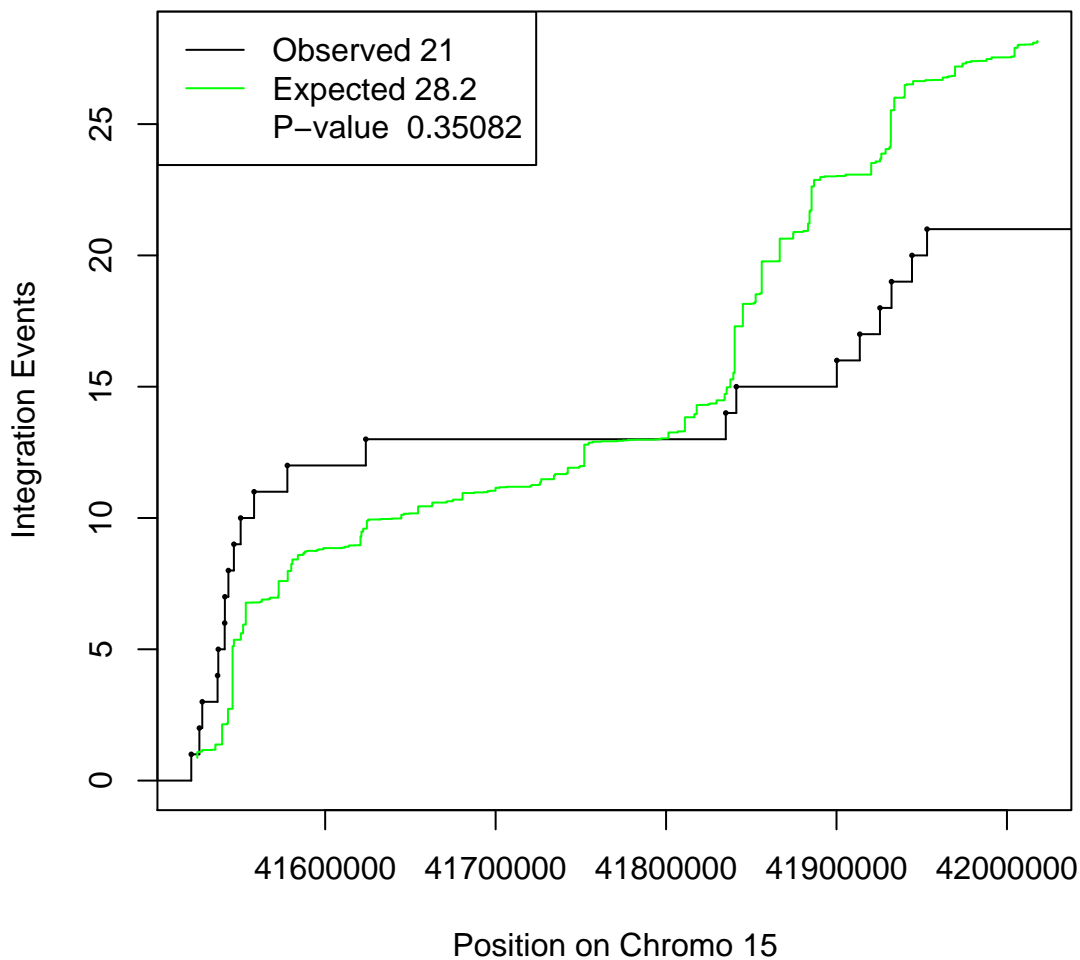

## ENCODE Region: ENr311

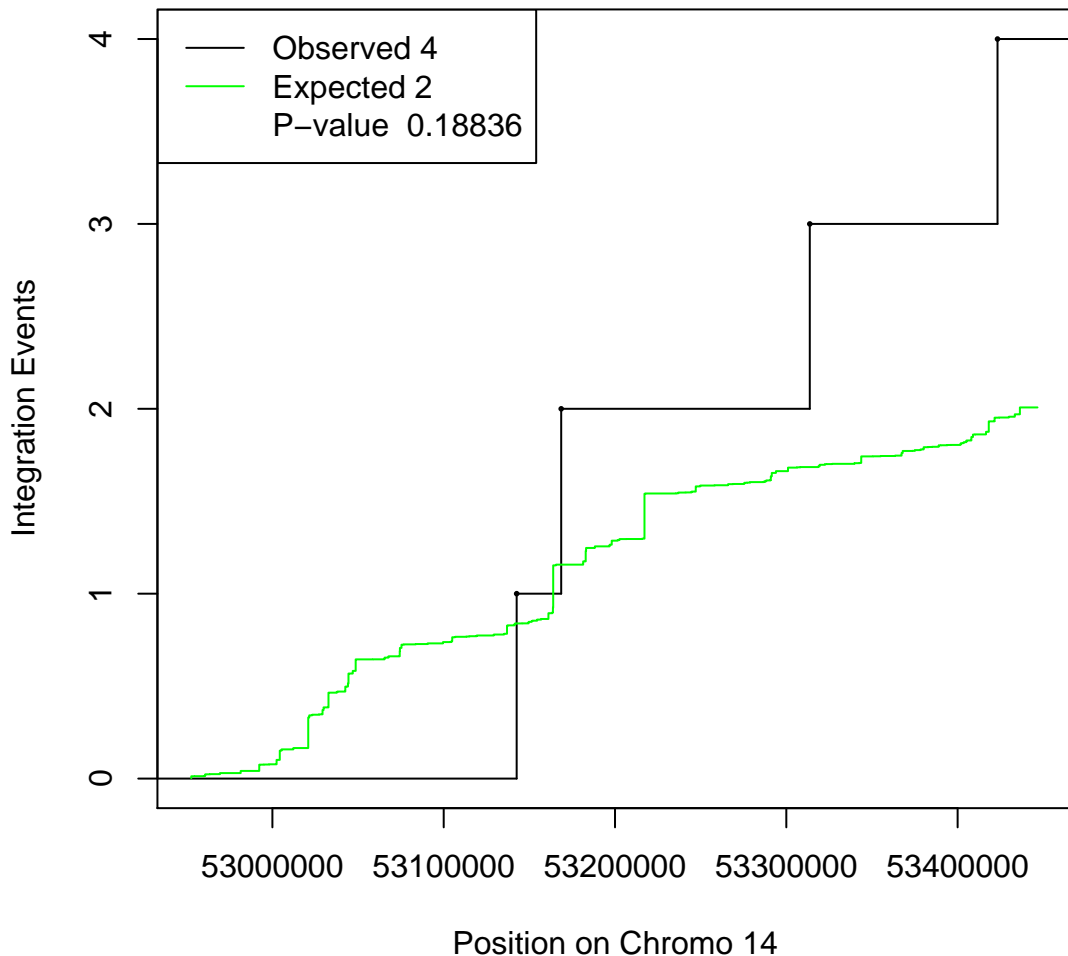

## ENCODE Region: ENr312

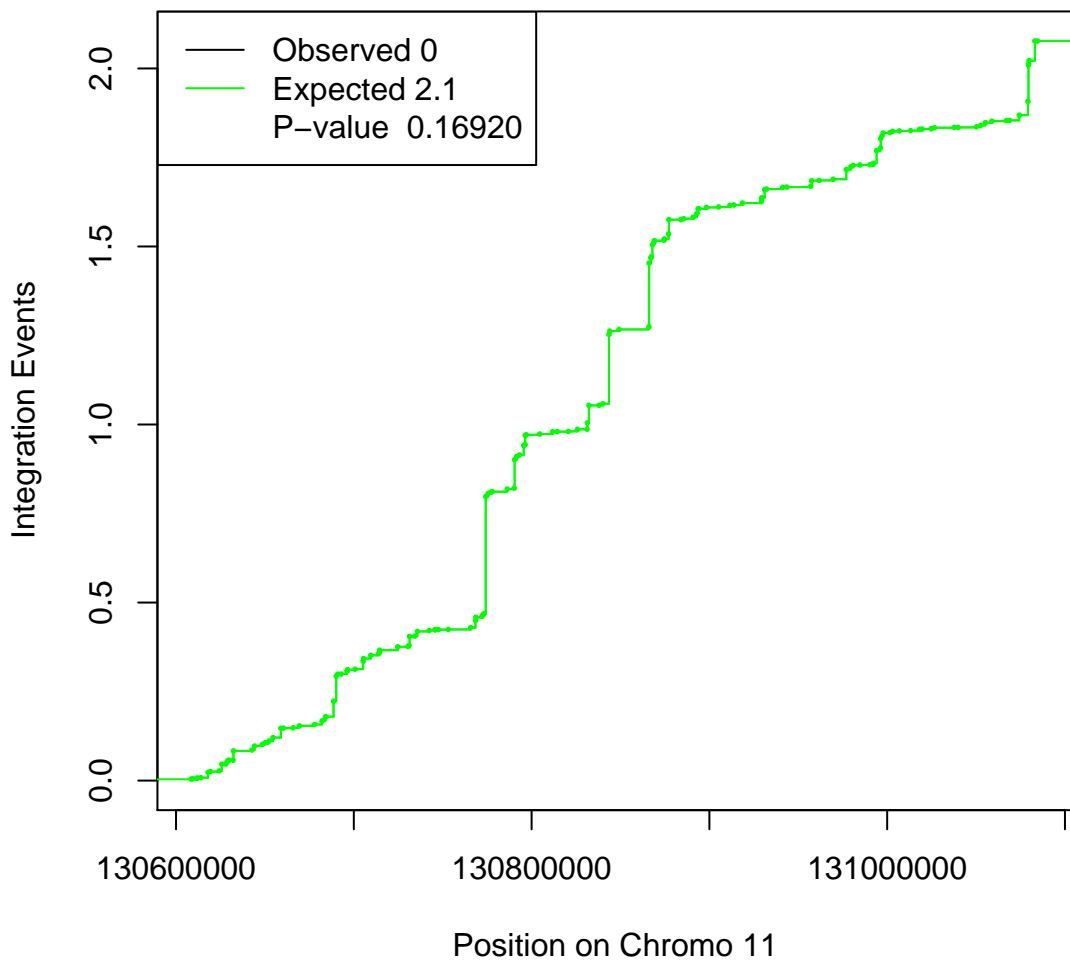

## ENCODE Region: ENr313

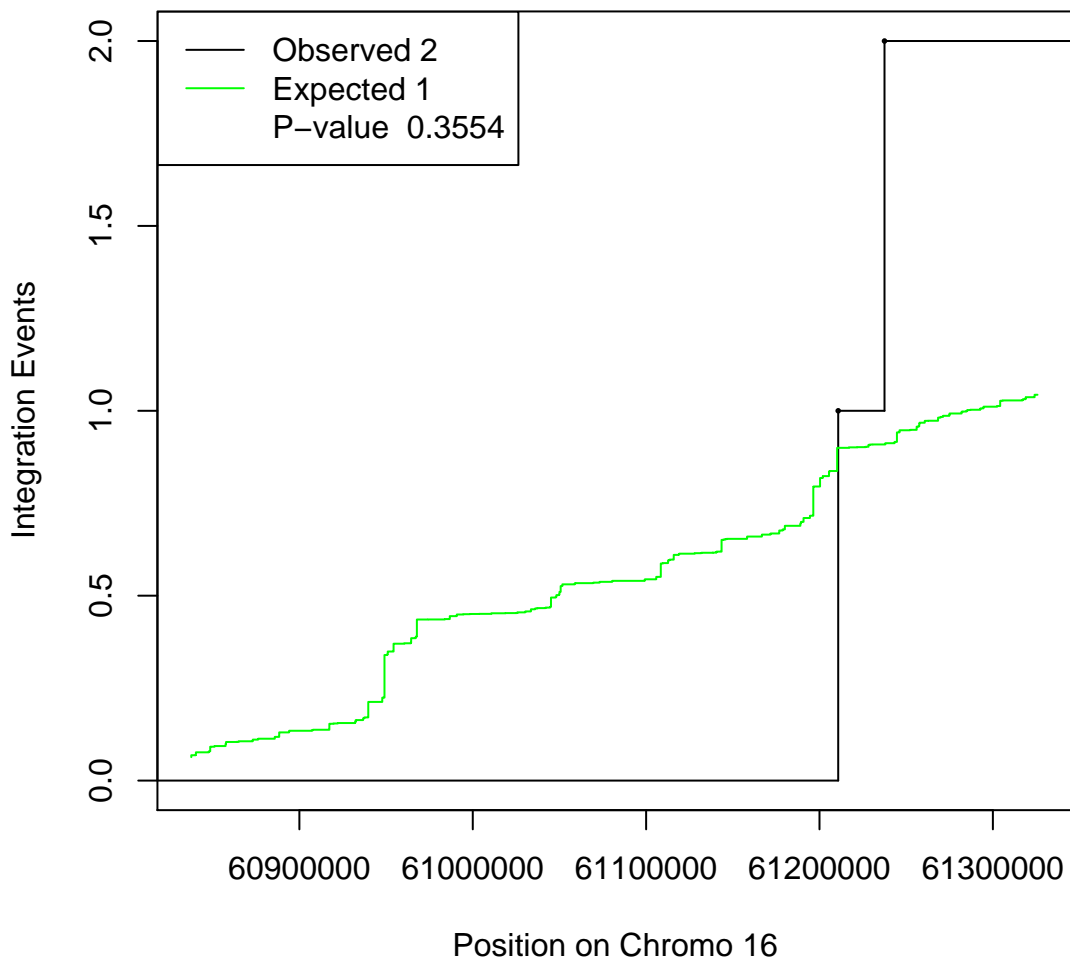

## ENCODE Region: ENr321

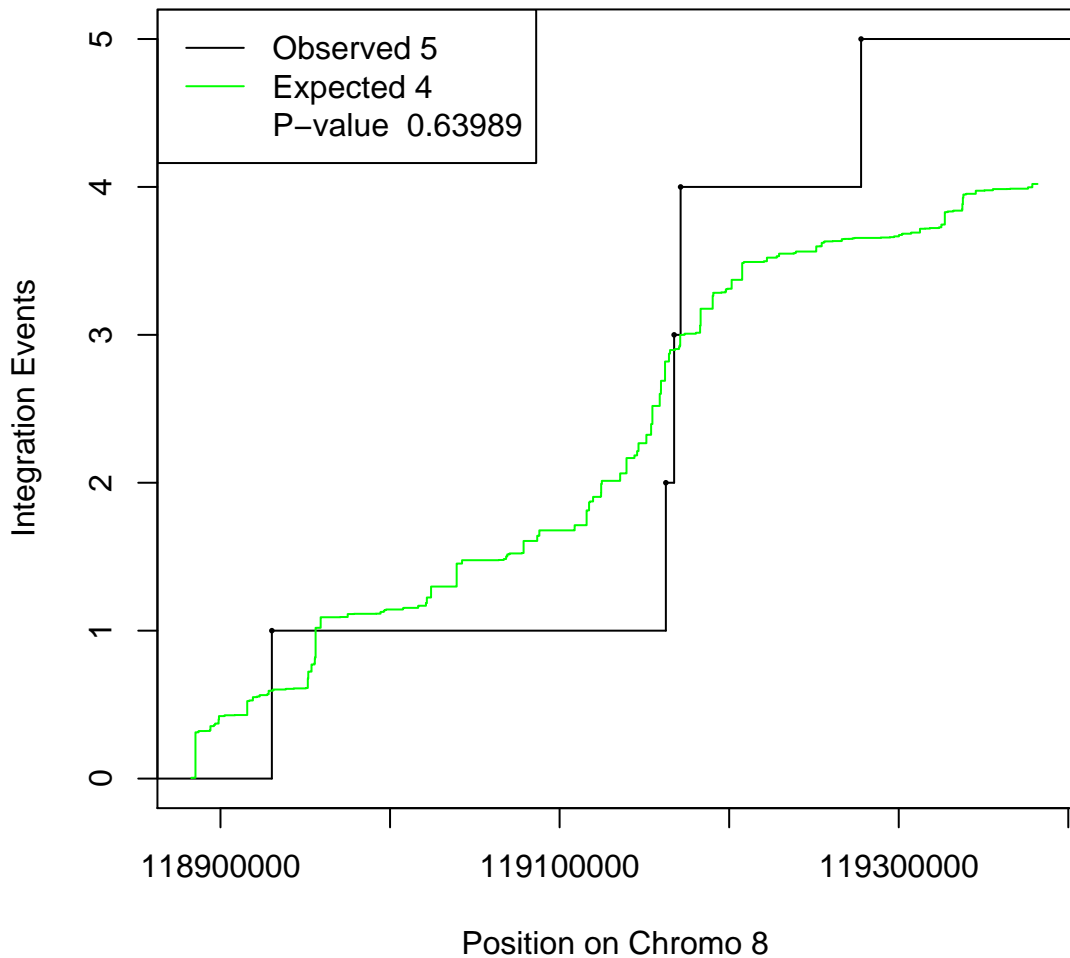

## ENCODE Region: ENr322

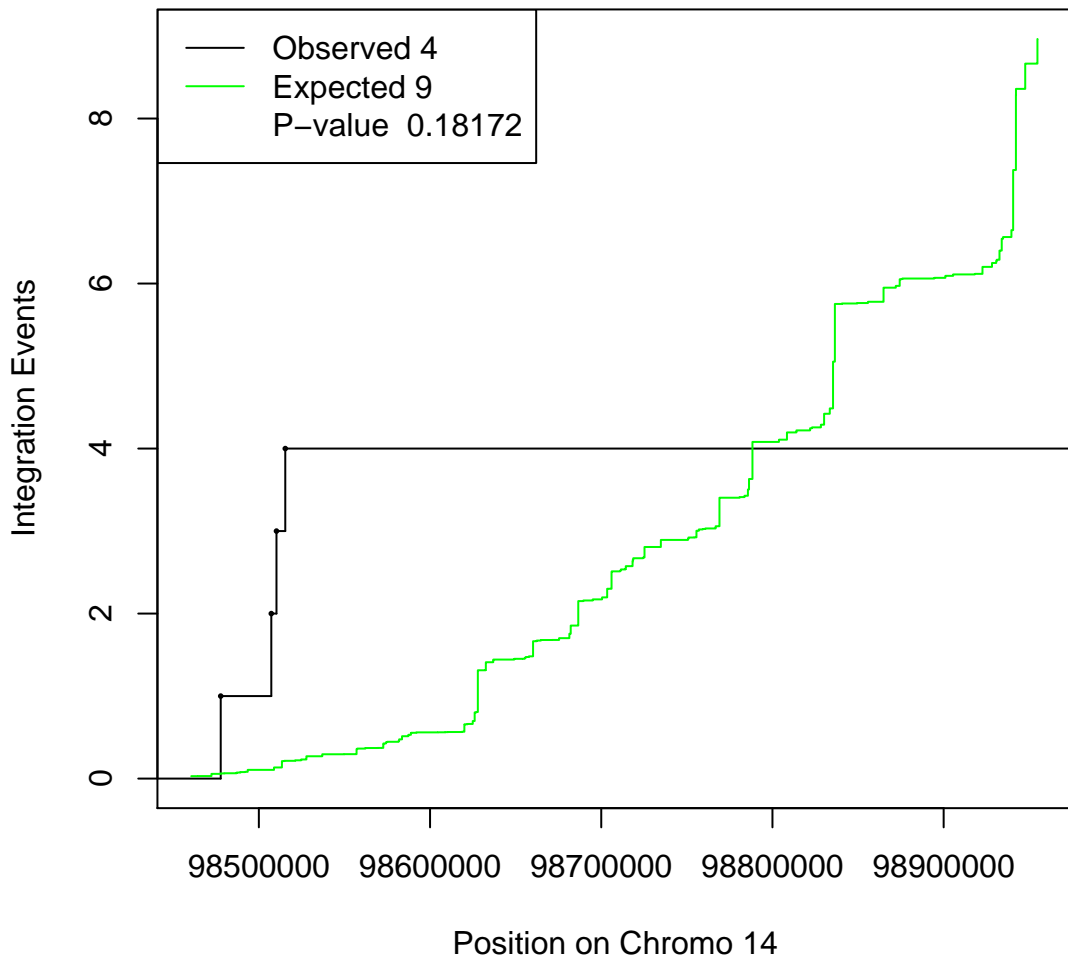

## ENCODE Region: ENr323

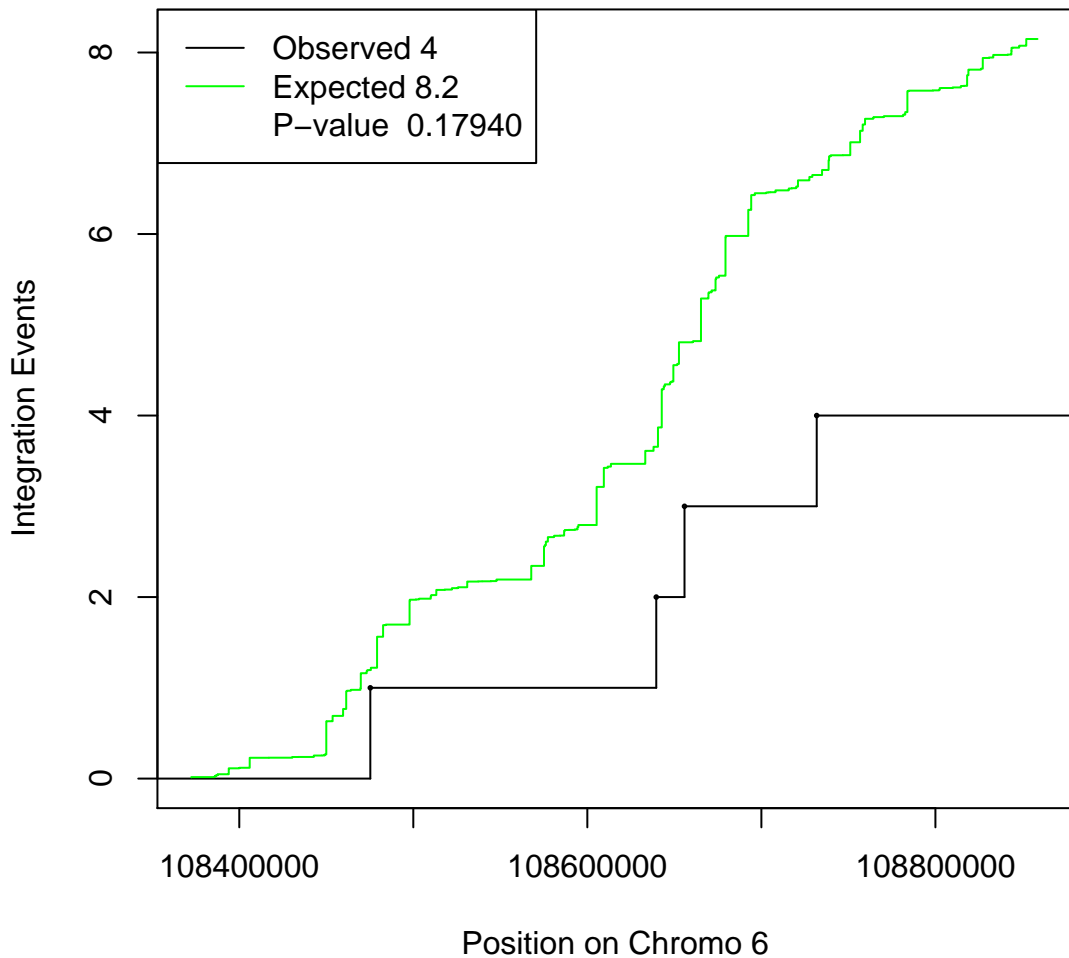

## ENCODE Region: ENr324

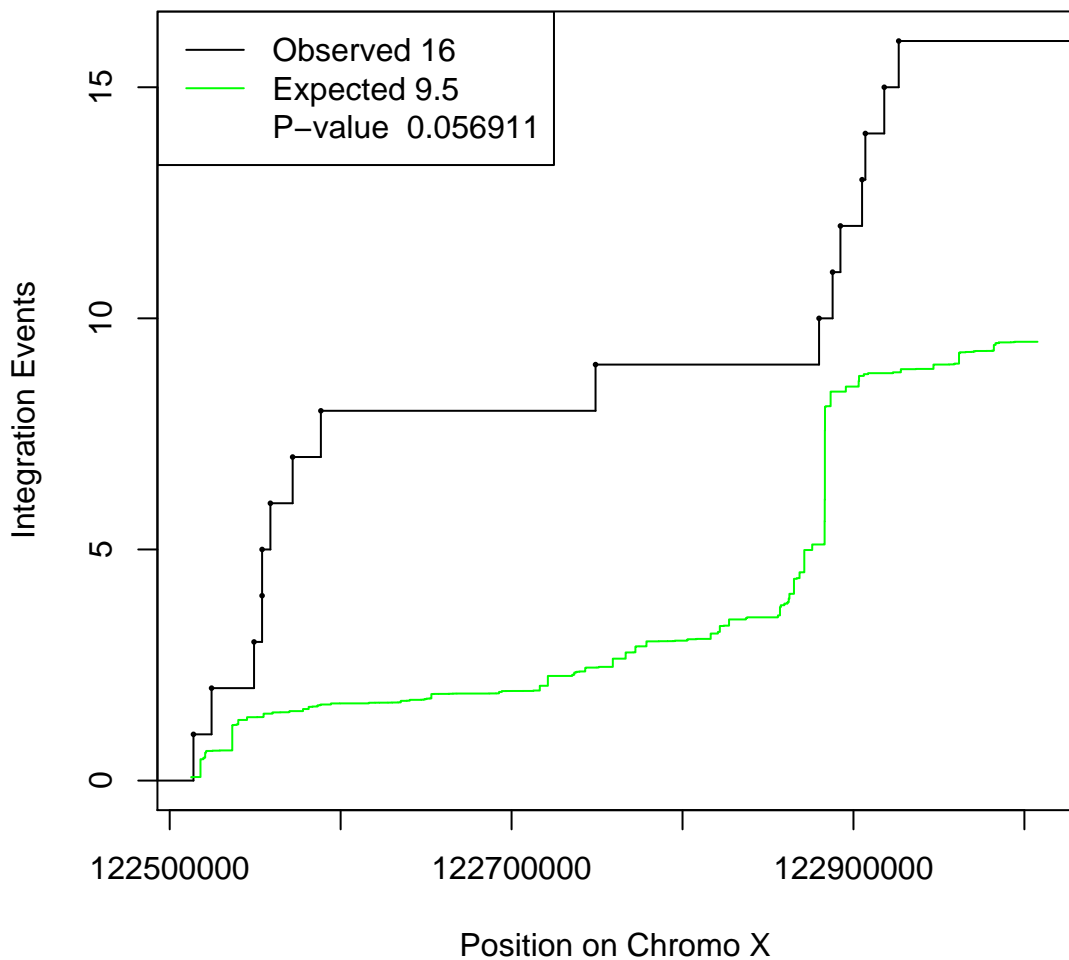



## ENCODE Region: ENr331

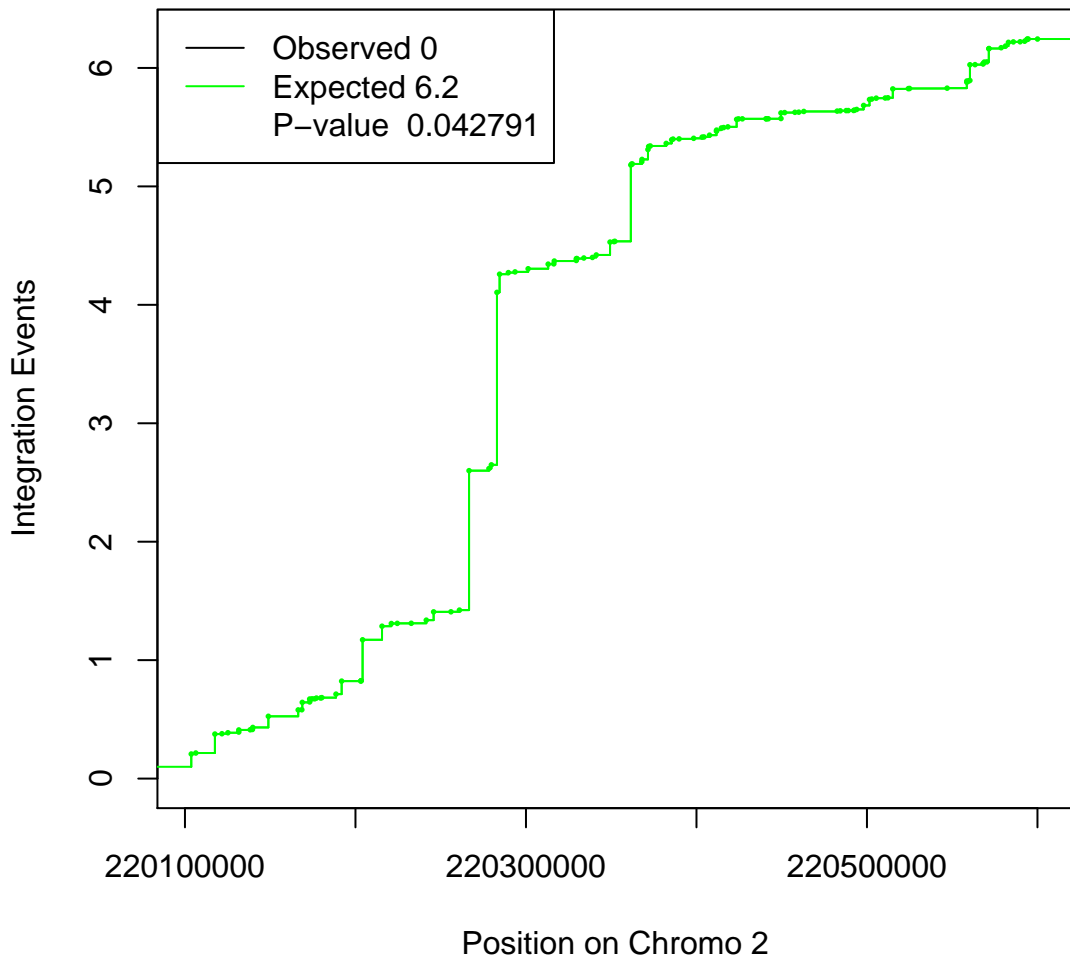

## ENCODE Region: ENr332

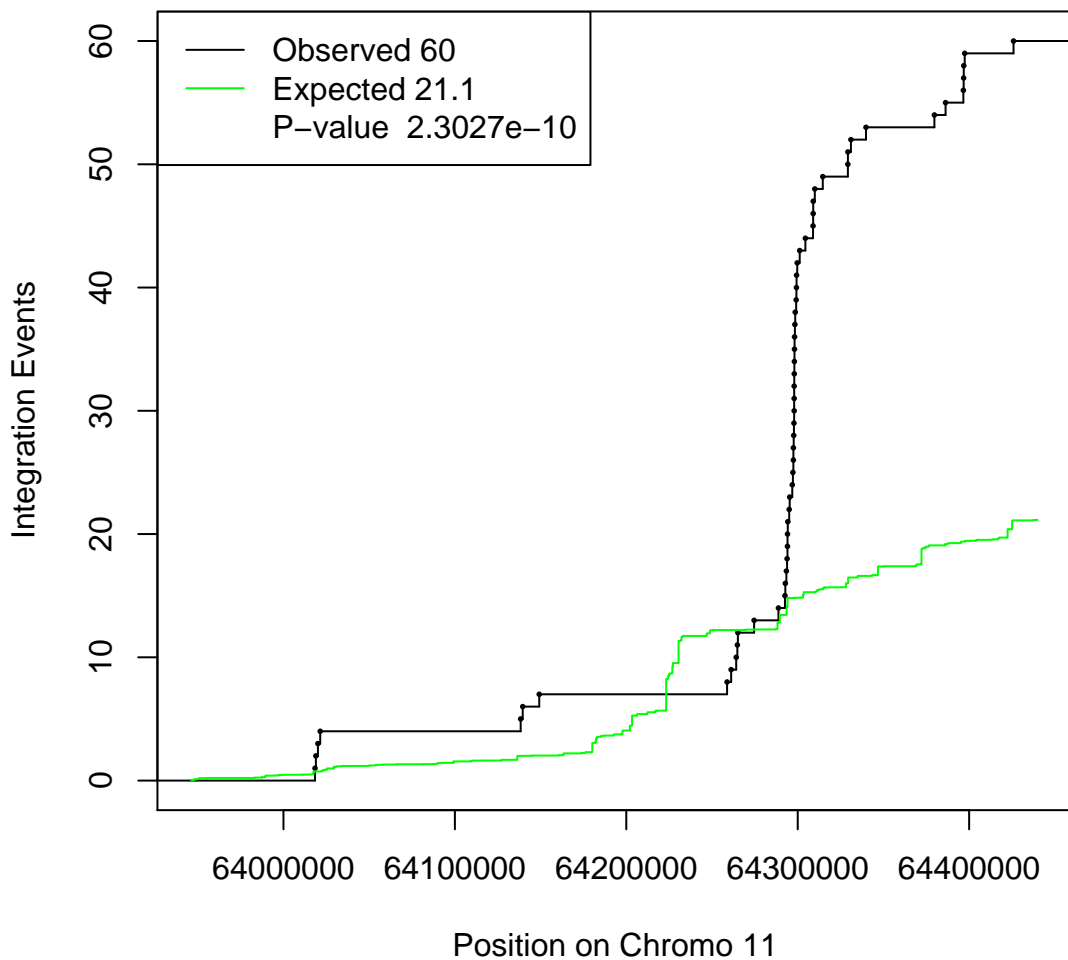

## ENCODE Region: ENr333

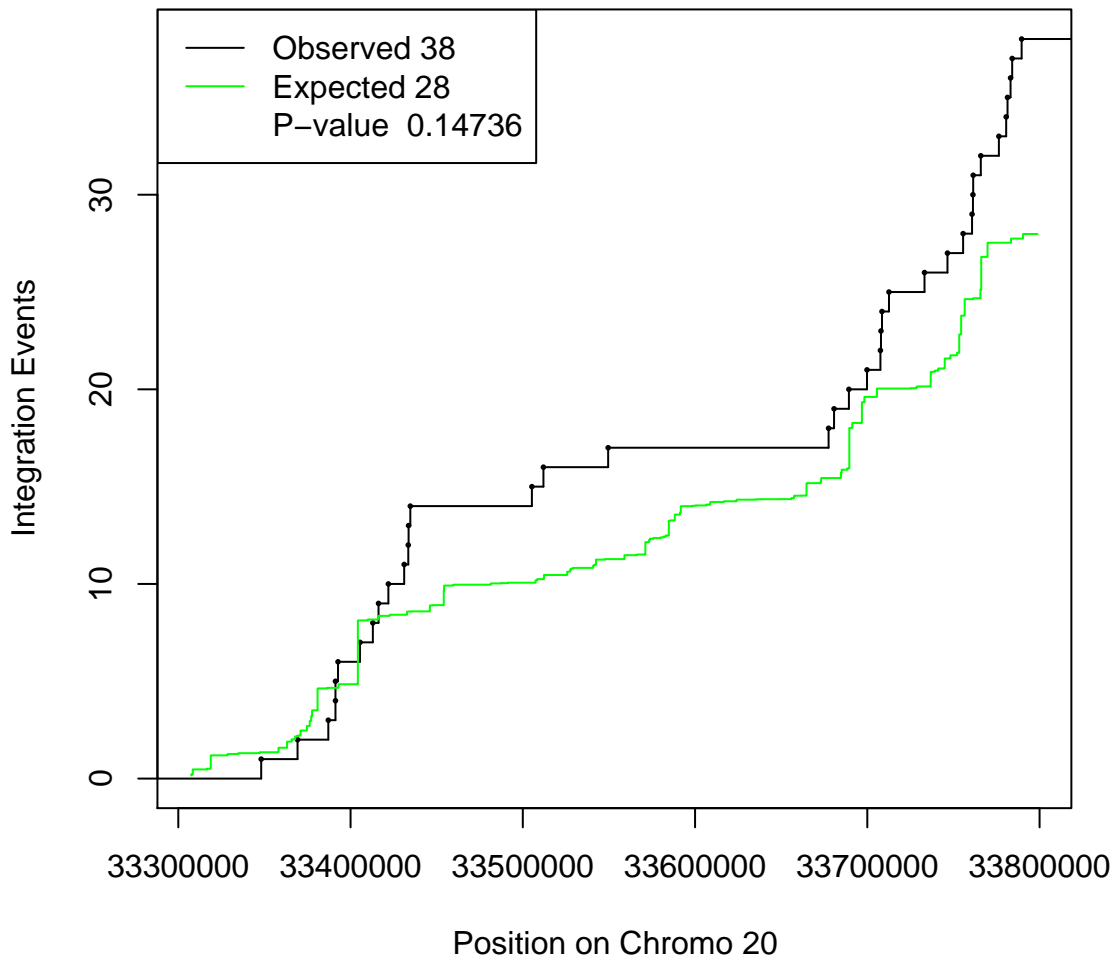

## ENCODE Region: ENr334

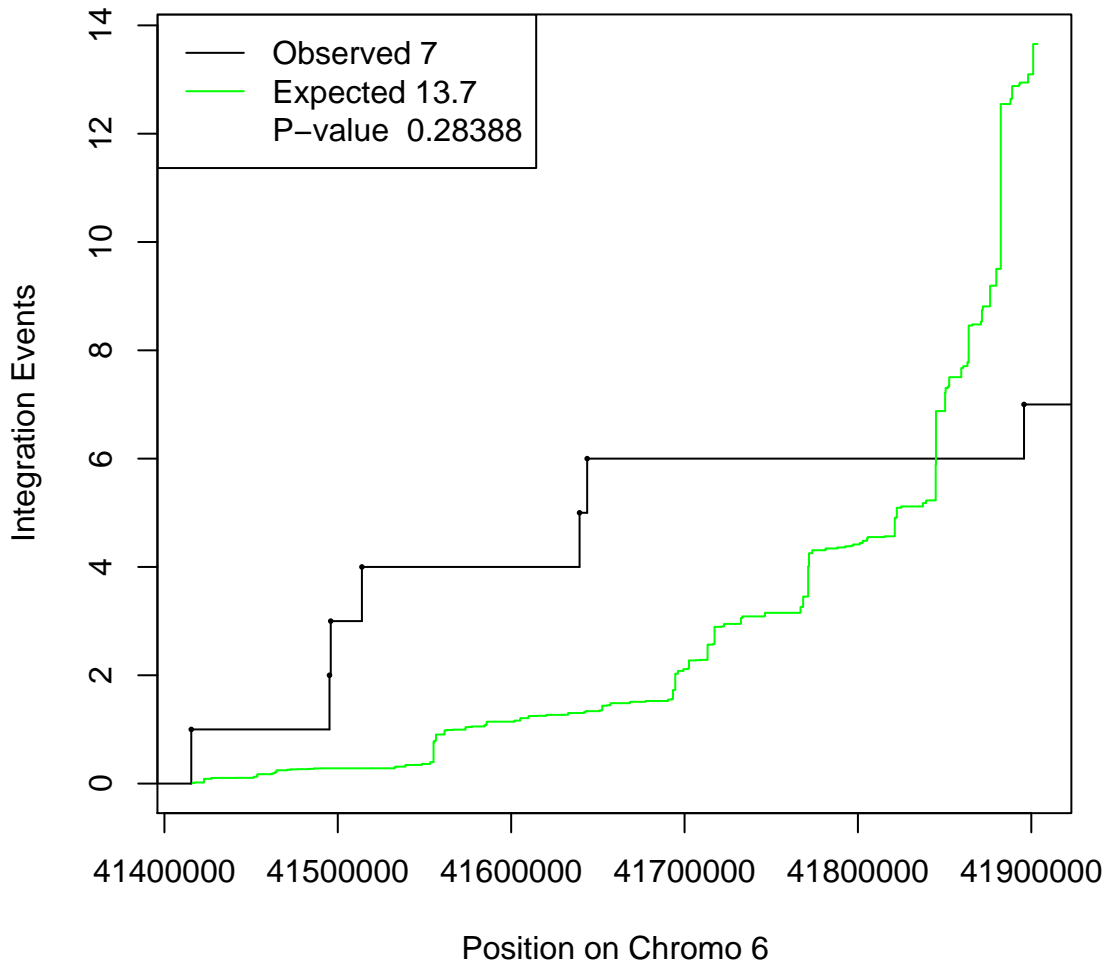

Supplement: SupS6-hotEncode.pdf [file SupS6-hotEncode.pdf]
