# Supplementary material for: HIV integration site selection: Analysis by massively parallel pyrosequencing reveals association with epigenetic modifications
Source: HighWire-hosted journal article supplement (doi:10.1101/gr.6286907), 2007-06-01
Supplement: SupS3-wang-general.pdf [file SupS3-wang-general.pdf]

# Some Regression Models of HIV Integration Targetting

Charles C. Berry

September 7, 2006

## Abstract

Gary Wang has developed two datasets using 454 sequencing to isolate tens of thousands of HIV integration sites in human cells. Here the relation of the a collection of variables previously shown to be correlated with integration targetting, LEDGF responsiveness, and density of GC in genomic regions surrounding a potential site is studied.

## Contents

|          |                                                    |           |
|----------|----------------------------------------------------|-----------|
| <b>1</b> | <b>Data Used</b>                                   | <b>1</b>  |
| 1.1      | Integration Sites . . . . .                        | 1         |
| 1.2      | Variables Used . . . . .                           | 2         |
| <b>2</b> | <b>Predictive Accuracy of Individual Variables</b> | <b>4</b>  |
| <b>3</b> | <b>Regression of GC proportions</b>                | <b>5</b>  |
| <b>4</b> | <b>Regression of Other Variables</b>               | <b>6</b>  |
| <b>5</b> | <b>All Regressor Variables</b>                     | <b>7</b>  |
| <b>6</b> | <b>AVR vs MSE</b>                                  | <b>10</b> |
| <b>7</b> | <b>Combined vs Separate Regressions</b>            | <b>11</b> |
|          | <b>References</b>                                  | <b>12</b> |

## 1 Data Used

### 1.1 Integration Sites

Integration sites are recovered via 454 sequencing from a pool of integration sites obtained by infecting a human cell line (Jurkat). Two methods are used to

recover the sites. In the **Wang-VSVGgfp-Jurkat-454-Avr** subset, a cocktail of enzymes (AvrII, SpeI, NheI) is used to digest DNA and sequencing is from the HIV U3 end, while in the **Wang-VSVGgfp-Jurkat-454-Mse** subset, the MSEI enzyme is used to digest DNA and sequencing is from the HIV U5 end.

These results are screened to delete duplicate reports of the same integration event.

For each integration event, 3 control sites are sampled from among those genomic sites that are the same distance (in the direction of sequencing) from the nearest restriction site as the integration site.

Some few sites are not assigned chromosomal position as the BLAT alignments match genomic segments whose position is unknown. These are omitted from the analysis.

The available data for analysis broken down by subset and type of site (actual insertion or matched genomic control) is as follows:

| setName                     | type      |       |
|-----------------------------|-----------|-------|
|                             | insertion | match |
| Wang-VSVGgfp-Jurkat-454-Avr | 19921     | 59763 |
| Wang-VSVGgfp-Jurkat-454-Mse | 20564     | 61692 |

## 1.2 Variables Used

A collection of variables found to be associated with HIV integration in previous studies is included in this analysis along with a collection of variables giving the proportions of G or C bases in windows of various sizes surrounding the site of interest.

The variables used and brief abbreviations for them are as follows:

**uni.100k** Unigene Genes within  $\pm 50$  kilobases

**uni.200k** Unigene Genes within  $\pm 100$  kilobases

**uni.500k** Unigene Genes within  $\pm 250$  kilobases

**uni.1M** Unigene Genes within  $\pm 500$  kilobases

**uni.2M** Unigene Genes within  $\pm 1$  megabase

**low.ex.250k** Affymetrix probesets achieving the 50<sup>th</sup> percentile of expression within  $\pm 125$  kilobases

**med.ex.250k** Affymetrix probesets achieving the 75<sup>th</sup> percentile of expression within  $\pm 125$  kilobases

**high.ex.250k** Affymetrix probesets achieving the 87.5<sup>th</sup> percentile of expression within  $\pm 125$  kilobases

**low.ex.2M** Affymetrix probesets achieving the 50<sup>th</sup> percentile of expression within  $\pm 1$  megabase

**med.ex.2M** Affymetrix probesets achieving the 75<sup>th</sup> percentile of expression within  $\pm 1$  megabase

**high.ex.2M** Affymetrix probesets achieving the 87.5<sup>th</sup> percentile of expression within  $\pm 1$  megabase

**cpg.dens.50k** Density of CpG sites within  $\pm 25$  kilobases

**cpg.dens.250k** Density of CpG sites within  $\pm 125$  kilobases

**dnaseI.100k** Density of DNase I sites within  $\pm 50$  kilobases

**dnaseI.1M** Density of DNase I sites within  $\pm 500$  kilobases

**ensGene.genes** Whether site is in an Ensembl gene

**refGene.genes** Whether site is in a RefSeq gene

**LEDGF** Whether a LEDGF response was measured.

site summed over each position in twenty bases of flanking sequence (10 upstream and 10 downstream). In order to avoid overfitting and resubstitution bias in estimates of association with integration, the score based on the sum of all twenty bases was computed using leave-one-out cross-validation

**score20bp** The loglikelihood for integration versus control

**score50bp** The loglikelihood as just described, but for 50 bases

**score100bp** The loglikelihood as just described, but for 100 bases

**gc20** The proportion of G or C bases within  $\pm 10$  bases

**gc50** The proportion of G or C bases within  $\pm 25$  bases not counting those within  $\pm 10$  bases

**gc100** The proportion of G or C bases within  $\pm 50$  bases not counting those within  $\pm 25$  bases

**gc250** The proportion of G or C bases within  $\pm 125$  bases not counting those within  $\pm 50$  bases

**gc500** The proportion of G or C bases within  $\pm 250$  bases not counting those within  $\pm 125$  bases

**gc1000** The proportion of G or C bases within  $\pm 500$  bases not counting those within  $\pm 250$  bases

**gc2000** The proportion of G or C bases within  $\pm 1000$  bases not counting those within  $\pm 500$  bases

**gc5000** The proportion of G or C bases within  $\pm 2500$  bases not counting those within  $\pm 1000$  bases

**gc10000** The proportion of G or C bases within  $\pm 5000$  bases not counting those within  $\pm 2500$  bases

**gc25000** The proportion of G or C bases within  $\pm 12.5$  kilobases not counting those within  $\pm 5000$

**gc50000** The proportion of G or C bases within  $\pm 25$  kilobases not counting those within  $\pm 12.5$  kilobases

**gc100000** The proportion of G or C bases within  $\pm 50$  kilobases not counting those within  $\pm 25$  kilobases

**gc250000** The proportion of G or C bases within  $\pm 125$  kilobases not counting those within  $\pm 50$  kilobases

**gc500000** The proportion of G or C bases within  $\pm 250$  kilobases not counting those within  $\pm 125$  kilobases

**gc1000000** The proportion of G or C bases within  $\pm 0.5$  megabases not counting those within  $\pm 250$  kilobases

**gc5000000** The proportion of G or C bases within  $\pm 2.5$  megabases not counting those within  $\pm 0.5$  megabases

**gc10000000** The proportion of G or C bases within  $\pm 5$  megabases not counting those within  $\pm 2.5$  megabases

A transformation is applied to all variables other than the GC proportions, the loglikelihood scores, and the gene indicators. The transformation takes ranks of the values in each data set and then scales them to lie in the interval  $(-1, 1)$ .

## 2 Predictive Accuracy of Individual Variables

The predictive value of each variable is assessed using the area under the ROC curve.

The following table gives the areas under the ROC curve and its standard error.

|          | Avr.area | Avr.stderr | Mse.area | Mse.stderr |
|----------|----------|------------|----------|------------|
| ace.100k | 0.784    | 0.002      | 0.799    | 0.002      |
| ace.200k | 0.778    | 0.002      | 0.795    | 0.002      |
| ace.500k | 0.767    | 0.002      | 0.784    | 0.002      |
| ace.1M   | 0.756    | 0.002      | 0.772    | 0.002      |
| ace.2M   | 0.738    | 0.002      | 0.756    | 0.002      |
| uni.100k | 0.757    | 0.002      | 0.770    | 0.002      |

|               |       |       |       |       |
|---------------|-------|-------|-------|-------|
| uni.200k      | 0.759 | 0.002 | 0.773 | 0.002 |
| uni.500k      | 0.749 | 0.002 | 0.767 | 0.002 |
| uni.1M        | 0.741 | 0.002 | 0.759 | 0.002 |
| uni.2M        | 0.728 | 0.002 | 0.749 | 0.002 |
| low.ex.250k   | 0.780 | 0.002 | 0.792 | 0.002 |
| med.ex.250k   | 0.770 | 0.002 | 0.779 | 0.002 |
| high.ex.250k  | 0.725 | 0.002 | 0.731 | 0.002 |
| low.ex.2M     | 0.741 | 0.002 | 0.757 | 0.002 |
| med.ex.2M     | 0.738 | 0.002 | 0.755 | 0.002 |
| high.ex.2M    | 0.726 | 0.002 | 0.742 | 0.002 |
| cpg.dens.50k  | 0.678 | 0.002 | 0.696 | 0.002 |
| cpg.dens.250k | 0.729 | 0.002 | 0.750 | 0.002 |
| dnaseI.100k   | 0.744 | 0.002 | 0.762 | 0.002 |
| dnaseI.1M     | 0.750 | 0.002 | 0.769 | 0.002 |
| LEDGF         | 0.511 | 0.001 | 0.512 | 0.001 |
| ensGene.genes | 0.702 | 0.002 | 0.705 | 0.002 |
| refGene.genes | 0.693 | 0.002 | 0.697 | 0.002 |
| score20bp     | 0.825 | 0.002 | 0.820 | 0.002 |
| score50bp     | 0.838 | 0.002 | 0.836 | 0.002 |
| score100bp    | 0.837 | 0.002 | 0.839 | 0.002 |
| gc20          | 0.499 | 0.003 | 0.530 | 0.002 |
| gc50          | 0.457 | 0.003 | 0.491 | 0.003 |
| gc100         | 0.466 | 0.003 | 0.508 | 0.003 |
| gc250         | 0.471 | 0.003 | 0.515 | 0.003 |
| gc500         | 0.484 | 0.003 | 0.525 | 0.003 |
| gc1000        | 0.494 | 0.003 | 0.530 | 0.003 |
| gc2000        | 0.507 | 0.003 | 0.535 | 0.003 |
| gc5000        | 0.539 | 0.003 | 0.566 | 0.003 |
| gc10000       | 0.564 | 0.003 | 0.595 | 0.003 |
| gc25000       | 0.596 | 0.003 | 0.625 | 0.003 |
| gc50000       | 0.620 | 0.003 | 0.649 | 0.003 |
| gc100000      | 0.653 | 0.003 | 0.682 | 0.002 |
| gc250000      | 0.697 | 0.002 | 0.722 | 0.002 |
| gc500000      | 0.709 | 0.002 | 0.734 | 0.002 |
| gc1000000     | 0.709 | 0.002 | 0.731 | 0.002 |
| gc5000000     | 0.685 | 0.003 | 0.708 | 0.002 |
| gc10000000    | 0.653 | 0.003 | 0.668 | 0.003 |

As is evident, the local sequence variables have the strongest associations (in the sense of the largest departures of the ROC curve areas from 0.50), followed by variables that reflect the density of expressed genes or just genes, then the density of DNase I sites, then CpG density and GC proportion at wider window widths or location in a gene, followed by the remaining variables.

Since these variables tend to be correlated with others in the set, it is helpful to determine whether some of these associations are merely the result of *confounding*, i.e. that some variables appear to be associated with integration

merely because they are correlated with variables that bear a more proximal relation to the integration process. To determine whether this may be the case, we use conditional logit regression as implemented in the the R `survival` library [Therneau and Lumley, 2006].

An examination of the GC proportions will appear first followed by consideration of the effects of the other variables.

### 3 Regression of GC proportions

Below is a table of results from conditional logit regression using the GC proportions. All variables are included in a single regression model for each dataset. A penalized loglikelihood approach ala ridge regression was used to protect against unstable results due to the large number of correlated variables being used.

Preliminary 10-fold cross-validation showed the highest log-likelihoods were obtained when a penalty was chosen that resulted in approximately 17 effective degrees of freedom — and that value was used, but any choice approaching the number of regressors seemed to work well. Likewise, the cross-validated ROC curve areas based on the fitted log-odds for these datasets were highest for effective degrees of freedom approaching the number of regressors. Likely, the large number of observations accounts for the stability of these results with little or no penalization required.

|            | Avr.coef | Avr.stderr | Avr.p.value | Mse.coef | Mse.stderr | Mse.p.value |
|------------|----------|------------|-------------|----------|------------|-------------|
| gc20       | 0.854    | 0.086      | 2.0e-23     | 0.752    | 0.085      | 8.5e-19     |
| gc50       | -1.557   | 0.102      | 9.6e-53     | -1.221   | 0.101      | 1.6e-33     |
| gc100      | -0.907   | 0.126      | 5.1e-13     | -0.529   | 0.124      | 2.2e-05     |
| gc250      | -1.350   | 0.166      | 4.5e-16     | -0.508   | 0.162      | 1.8e-03     |
| gc500      | -1.371   | 0.190      | 5.5e-13     | -0.882   | 0.186      | 2.2e-06     |
| gc1000     | -2.742   | 0.217      | 1.7e-36     | -2.200   | 0.211      | 1.7e-25     |
| gc2000     | -3.983   | 0.255      | 3.4e-55     | -4.318   | 0.248      | 5.5e-68     |
| gc5000     | -3.817   | 0.319      | 4.4e-33     | -4.165   | 0.311      | 6.2e-41     |
| gc10000    | -2.436   | 0.340      | 7.9e-13     | -2.636   | 0.338      | 6.8e-15     |
| gc25000    | -2.535   | 0.444      | 1.2e-08     | -2.936   | 0.443      | 3.4e-11     |
| gc50000    | -0.888   | 0.502      | 7.7e-02     | -0.911   | 0.498      | 6.7e-02     |
| gc100000   | 2.035    | 0.536      | 1.5e-04     | 2.924    | 0.535      | 4.6e-08     |
| gc250000   | 12.876   | 0.579      | 1.4e-109    | 11.035   | 0.574      | 1.9e-82     |
| gc500000   | 8.905    | 0.578      | 1.6e-53     | 10.660   | 0.581      | 4.0e-75     |
| gc1000000  | 9.157    | 0.559      | 2.0e-60     | 7.917    | 0.550      | 6.4e-47     |
| gc5000000  | 3.559    | 0.601      | 3.1e-09     | 4.231    | 0.592      | 8.6e-13     |
| gc10000000 | -2.554   | 0.480      | 1.0e-07     | -1.992   | 0.475      | 2.8e-05     |

The regression coefficients are partial derivatives of the log-intensity of integration with respect to the GC proportion variables. Thus, each coefficient measures the effect of the corresponding variable when all other variables are held constant. Since the GC proportions are highly correlated, the pattern of

associations seen between them and integration targetting is not expected to be mirrored in the regression coefficients.

For both datasets, the same pattern of coefficients is seen. At the narrowest width (20 bases), higher GC proportion favors integration, but for somewhat wider widths (50 – 100000 bases) higher AT proportion favors integration, then at still higher widths (250 kilobases – 5 megabases) higher GC proportion favors integration, and at the highest width (10 megabases) higher AT proportion favors integration.

All in all, how predictive are the GC proportions? The areas under the ROC curves based on the fitted log-odds for these datasets are 0.788 (AVR) and 0.782 (MSE). Comparing this to the ROC curve areas above for single variables, the 'combined GC' values are competitive with the gene density variables.

## 4 Regression of Other Variables

Here are the results for regressing integration siting on the other variables. Since the loglikelihood scores pertain to overlapping regions, the score for the 20bp region is subtracted from that for the 50bp region, and that for the 50bp region is subtracted from that for the 100bp region.

The variables other than the loglikelihood scores were penalized ala ridge regression. Preliminary 10-fold cross-validation showed the highest log-likelihoods were obtained when a penalty was chosen that resulted in approximately 20 effective degrees of freedom — and that value was used, but any choice approaching the number of regressors seemed to work well. Likewise, the cross-validated ROC curve areas based on the fitted log-odds for these datasets were highest for effective degrees of freedom approaching the number of regressors. Likely, the large number of observations accounts for the stability of these results with little or no penalization required.

|                        | Avr.coef | Avr.stderr | Avr.p.value | Mse.coef | Mse.stderr | Mse.p.value |
|------------------------|----------|------------|-------------|----------|------------|-------------|
| score20bp              | 0.9631   | 0.012      | 0.0e+00     | 0.927    | 0.012      | 0.0e+00     |
| score50bp - score20bp  | 0.9367   | 0.027      | 5.9e-270    | 1.005    | 0.028      | 5.9e-281    |
| score100bp - score50bp | 0.7989   | 0.034      | 6.8e-125    | 0.608    | 0.038      | 3.5e-56     |
| ace.100k               | 0.6966   | 0.075      | 9.0e-21     | 0.675    | 0.070      | 9.9e-22     |
| ace.200k               | -0.3756  | 0.097      | 1.1e-04     | -0.233   | 0.093      | 1.2e-02     |
| ace.500k               | -0.0043  | 0.104      | 9.7e-01     | -0.085   | 0.099      | 3.9e-01     |
| ace.1M                 | -0.0247  | 0.110      | 8.2e-01     | 0.051    | 0.105      | 6.3e-01     |
| ace.2M                 | -0.0996  | 0.110      | 3.6e-01     | -0.187   | 0.104      | 7.1e-02     |
| uni.100k               | 0.3992   | 0.064      | 3.8e-10     | 0.293    | 0.060      | 1.1e-06     |
| uni.200k               | -0.1610  | 0.082      | 5.0e-02     | -0.113   | 0.078      | 1.5e-01     |
| uni.500k               | 0.0033   | 0.092      | 9.7e-01     | -0.038   | 0.088      | 6.7e-01     |
| uni.1M                 | -0.1219  | 0.102      | 2.3e-01     | -0.130   | 0.098      | 1.8e-01     |
| uni.2M                 | -0.0340  | 0.093      | 7.1e-01     | 0.045    | 0.089      | 6.1e-01     |
| low.ex.250k            | 0.4970   | 0.064      | 8.3e-15     | 0.583    | 0.061      | 1.7e-21     |
| med.ex.250k            | 0.4920   | 0.065      | 3.4e-14     | 0.429    | 0.062      | 5.2e-12     |

|               |         |       |         |        |       |         |
|---------------|---------|-------|---------|--------|-------|---------|
| high.ex.250k  | 0.1838  | 0.046 | 7.0e-05 | 0.159  | 0.045 | 4.5e-04 |
| low.ex.2M     | 0.3256  | 0.094 | 5.3e-04 | 0.213  | 0.088 | 1.6e-02 |
| med.ex.2M     | -0.0176 | 0.097 | 8.6e-01 | -0.018 | 0.091 | 8.5e-01 |
| high.ex.2M    | 0.0169  | 0.064 | 7.9e-01 | 0.158  | 0.062 | 1.2e-02 |
| cpg.dens.50k  | -0.1128 | 0.039 | 4.2e-03 | -0.209 | 0.038 | 3.8e-08 |
| cpg.dens.250k | -0.1168 | 0.053 | 2.7e-02 | -0.052 | 0.050 | 3.0e-01 |
| dnaseI.100k   | 0.3558  | 0.041 | 2.2e-18 | 0.454  | 0.039 | 7.3e-31 |
| dnaseI.1M     | 0.5598  | 0.060 | 9.5e-21 | 0.357  | 0.057 | 3.5e-10 |
| LEDGF         | 0.4134  | 0.096 | 1.7e-05 | 0.448  | 0.090 | 6.9e-07 |
| ensGene.genes | 0.5893  | 0.051 | 2.0e-31 | 0.568  | 0.049 | 2.6e-31 |
| refGene.genes | 0.3715  | 0.049 | 3.8e-14 | 0.410  | 0.047 | 5.2e-18 |

## 5 All Regressor Variables

Here is the table of results when all regressor variables are used together. Again, a penalized loglikelihood was used with the shrinkage parameters set at the same values as in the regression above.

|                        | Avr.coef | Avr.stderr | Avr.p.value | Mse.coef | Mse.stderr | Mse.p.value |
|------------------------|----------|------------|-------------|----------|------------|-------------|
| score20bp              | 0.9622   | 0.013      | 0.0e+00     | 0.9393   | 0.013      | 0.0e+00     |
| score50bp - score20bp  | 0.9679   | 0.033      | 9.1e-190    | 0.9234   | 0.030      | 1.6e-204    |
| score100bp - score50bp | 0.7677   | 0.044      | 1.8e-67     | 0.7482   | 0.042      | 9.6e-71     |
| ace.100k               | 0.5710   | 0.066      | 6.1e-18     | 0.5449   | 0.064      | 1.2e-17     |
| ace.200k               | -0.2192  | 0.081      | 6.7e-03     | -0.1347  | 0.078      | 8.5e-02     |
| ace.500k               | 0.0514   | 0.085      | 5.4e-01     | -0.0513  | 0.081      | 5.3e-01     |
| ace.1M                 | 0.0021   | 0.087      | 9.8e-01     | 0.0560   | 0.084      | 5.0e-01     |
| ace.2M                 | -0.3325  | 0.089      | 1.8e-04     | -0.3496  | 0.085      | 3.9e-05     |
| uni.100k               | 0.3540   | 0.058      | 1.4e-09     | 0.2705   | 0.056      | 1.5e-06     |
| uni.200k               | -0.1009  | 0.072      | 1.6e-01     | -0.0478  | 0.069      | 4.9e-01     |
| uni.500k               | 0.0678   | 0.077      | 3.8e-01     | 0.0514   | 0.075      | 4.9e-01     |
| uni.1M                 | -0.0331  | 0.083      | 6.9e-01     | -0.0019  | 0.080      | 9.8e-01     |
| uni.2M                 | -0.2938  | 0.078      | 1.7e-04     | -0.2441  | 0.075      | 1.2e-03     |
| low.ex.250k            | 0.4782   | 0.061      | 4.2e-15     | 0.5289   | 0.059      | 2.7e-19     |
| med.ex.250k            | 0.4663   | 0.062      | 4.8e-14     | 0.4014   | 0.060      | 2.0e-11     |
| high.ex.250k           | 0.2044   | 0.046      | 1.0e-05     | 0.2206   | 0.046      | 1.5e-06     |
| low.ex.2M              | 0.1353   | 0.080      | 9.0e-02     | 0.0813   | 0.077      | 2.9e-01     |
| med.ex.2M              | 0.1197   | 0.081      | 1.4e-01     | 0.1096   | 0.078      | 1.6e-01     |
| high.ex.2M             | 0.1130   | 0.060      | 5.8e-02     | 0.1913   | 0.058      | 9.6e-04     |
| cpg.dens.50k           | 0.0888   | 0.043      | 3.7e-02     | 0.0194   | 0.041      | 6.4e-01     |
| cpg.dens.250k          | -0.4583  | 0.056      | 2.9e-16     | -0.3084  | 0.054      | 9.1e-09     |
| dnaseI.100k            | 0.5394   | 0.042      | 1.7e-38     | 0.6280   | 0.040      | 1.1e-54     |
| dnaseI.1M              | 0.1703   | 0.061      | 5.0e-03     | 0.0940   | 0.058      | 1.1e-01     |
| LEDGF                  | 0.4197   | 0.101      | 3.5e-05     | 0.4793   | 0.097      | 7.2e-07     |
| ensGene.genes          | 0.4931   | 0.050      | 1.4e-22     | 0.4248   | 0.049      | 4.5e-18     |
| refGene.genes          | 0.3057   | 0.049      | 5.1e-10     | 0.3585   | 0.048      | 7.8e-14     |



|            |         |       |         |         |       |         |
|------------|---------|-------|---------|---------|-------|---------|
| gc20       | 0.8142  | 0.132 | 7.2e-10 | -0.7832 | 0.131 | 2.4e-09 |
| gc50       | 1.0856  | 0.175 | 5.5e-10 | -0.5758 | 0.156 | 2.2e-04 |
| gc100      | 1.1280  | 0.221 | 3.5e-07 | -0.2906 | 0.190 | 1.3e-01 |
| gc250      | -1.0933 | 0.257 | 2.1e-05 | -0.6600 | 0.247 | 7.6e-03 |
| gc500      | -1.0678 | 0.293 | 2.7e-04 | -0.4015 | 0.286 | 1.6e-01 |
| gc1000     | -3.0843 | 0.337 | 5.4e-20 | -2.8267 | 0.324 | 3.0e-18 |
| gc2000     | -3.7401 | 0.397 | 4.1e-21 | -3.8597 | 0.380 | 3.4e-24 |
| gc5000     | -4.2306 | 0.506 | 5.9e-17 | -4.5470 | 0.489 | 1.4e-20 |
| gc10000    | -1.6375 | 0.548 | 2.8e-03 | -1.2920 | 0.542 | 1.7e-02 |
| gc25000    | -2.3686 | 0.752 | 1.6e-03 | -2.2701 | 0.737 | 2.1e-03 |
| gc50000    | -0.1027 | 0.897 | 9.1e-01 | -0.4486 | 0.878 | 6.1e-01 |
| gc100000   | -2.1607 | 1.002 | 3.1e-02 | -0.3436 | 0.989 | 7.3e-01 |
| gc250000   | 8.2597  | 1.093 | 4.2e-14 | 4.4049  | 1.079 | 4.5e-05 |
| gc500000   | 3.5151  | 1.130 | 1.9e-03 | 6.2932  | 1.118 | 1.8e-08 |
| gc1000000  | 5.6719  | 1.061 | 9.1e-08 | 2.0019  | 1.047 | 5.6e-02 |
| gc5000000  | 7.8248  | 1.083 | 4.9e-13 | 8.3770  | 1.093 | 1.8e-14 |
| gc10000000 | -0.4855 | 0.822 | 5.5e-01 | 1.7229  | 0.825 | 3.7e-02 |

How much improvement does the additional of the GC proportion variables make to the fit? This can be answered in several ways. First, consider the increase in the loglikelihood reflected by the analysis of deviance table (deviance =  $-2 \times \log\text{-likelihood}$ ). The deviance for a (saturated) model that fits perfectly is zero, so one can speak of proportional reductions in the deviance. Here is the analysis of deviance table for the **AVR** data.

#### Analysis of Deviance Table

Model 1: Only variables besides GC proportions

Model 2: All Variables

|   | Resid. Df | Resid. Dev | Df | Deviance | P(> Chi ) |
|---|-----------|------------|----|----------|-----------|
| 1 | 79658     | 19286.9    |    |          |           |
| 2 | 79641     | 17257.5    | 17 | 2029.5   | 0.0       |

As is evident there is a 10.5 percent reduction in the deviance due to the addition of the GC proportions.

Here is the analysis of deviance for the **MSE** data.

#### Analysis of Deviance Table

Model 1: Only variables besides GC proportions

Model 2: All Variables

|   | Resid. Df | Resid. Dev | Df | Deviance | P(> Chi ) |
|---|-----------|------------|----|----------|-----------|
| 1 | 82230     | 20505.8    |    |          |           |
| 2 | 82213     | 18090.5    | 17 | 2415.2   | 0.0       |

As is evident there is a 11.8 percent reduction in the deviance due to the addition of the GC proportions.

Likewise, one can consider the improvement in the area under the ROC curve.

Here are the ROC curve areas for the **AVR** data.

|                                       | AVR ROC areas |
|---------------------------------------|---------------|
| Only variables besides GC proportions | 0.920         |
| All Variables                         | 0.929         |
| Improvement                           | 0.009         |
| Percent of Maximum Improvement        | 11.130        |

Here are the ROC curve areas for the **MSE** data.

|                                       | MSE ROC areas |
|---------------------------------------|---------------|
| Only variables besides GC proportions | 0.910         |
| All Variables                         | 0.922         |
| Improvement                           | 0.011         |
| Percent of Maximum Improvement        | 12.451        |

So, by either metric — reduction in deviance or increase in area under the ROC curve — a modest improvement is due to GC proportions.

## 6 AVR vs MSE

The results for **AVR** and **MSE** seem a bit different. Here is a table that compares the regression coefficients for the model that uses all of the variables:

|                        | Avr.coef | Mse.coef | AVR-MSE | std.err | t-stat | p-value |
|------------------------|----------|----------|---------|---------|--------|---------|
| score20bp              | 0.9622   | 0.9393   | 0.023   | 0.018   | 1.271  | 2.0e-01 |
| score50bp - score20bp  | 0.9679   | 0.9234   | 0.045   | 0.045   | 0.996  | 3.2e-01 |
| score100bp - score50bp | 0.7677   | 0.7482   | 0.019   | 0.061   | 0.319  | 7.5e-01 |
| ace.100k               | 0.5710   | 0.5449   | 0.026   | 0.092   | 0.284  | 7.8e-01 |
| ace.200k               | -0.2192  | -0.1347  | -0.085  | 0.113   | -0.751 | 4.5e-01 |
| ace.500k               | 0.0514   | -0.0513  | 0.103   | 0.117   | 0.878  | 3.8e-01 |
| ace.1M                 | 0.0021   | 0.0560   | -0.054  | 0.121   | -0.445 | 6.6e-01 |
| ace.2M                 | -0.3325  | -0.3496  | 0.017   | 0.123   | 0.139  | 8.9e-01 |
| uni.100k               | 0.3540   | 0.2705   | 0.084   | 0.081   | 1.031  | 3.0e-01 |
| uni.200k               | -0.1009  | -0.0478  | -0.053  | 0.099   | -0.535 | 5.9e-01 |
| uni.500k               | 0.0678   | 0.0514   | 0.016   | 0.107   | 0.153  | 8.8e-01 |
| uni.1M                 | -0.0331  | -0.0019  | -0.031  | 0.115   | -0.271 | 7.9e-01 |
| uni.2M                 | -0.2938  | -0.2441  | -0.050  | 0.109   | -0.457 | 6.5e-01 |
| low.ex.250k            | 0.4782   | 0.5289   | -0.051  | 0.085   | -0.598 | 5.5e-01 |
| med.ex.250k            | 0.4663   | 0.4014   | 0.065   | 0.086   | 0.754  | 4.5e-01 |
| high.ex.250k           | 0.2044   | 0.2206   | -0.016  | 0.065   | -0.249 | 8.0e-01 |
| low.ex.2M              | 0.1353   | 0.0813   | 0.054   | 0.111   | 0.488  | 6.3e-01 |
| med.ex.2M              | 0.1197   | 0.1096   | 0.010   | 0.112   | 0.090  | 9.3e-01 |
| high.ex.2M             | 0.1130   | 0.1913   | -0.078  | 0.083   | -0.942 | 3.5e-01 |

|               |         |         |        |       |        |         |
|---------------|---------|---------|--------|-------|--------|---------|
| cpg.dens.50k  | 0.0888  | 0.0194  | 0.069  | 0.059 | 1.167  | 2.4e-01 |
| cpg.dens.250k | -0.4583 | -0.3084 | -0.150 | 0.078 | -1.933 | 5.3e-02 |
| dnaseI.100k   | 0.5394  | 0.6280  | -0.089 | 0.058 | -1.530 | 1.3e-01 |
| dnaseI.1M     | 0.1703  | 0.0940  | 0.076  | 0.084 | 0.906  | 3.6e-01 |
| LEDGF         | 0.4197  | 0.4793  | -0.060 | 0.140 | -0.426 | 6.7e-01 |
| ensGene.genes | 0.4931  | 0.4248  | 0.068  | 0.070 | 0.971  | 3.3e-01 |
| refGene.genes | 0.3057  | 0.3585  | -0.053 | 0.069 | -0.769 | 4.4e-01 |
| gc20          | 0.8142  | -0.7832 | 1.597  | 0.186 | 8.579  | 9.6e-18 |
| gc50          | 1.0856  | -0.5758 | 1.661  | 0.234 | 7.094  | 1.3e-12 |
| gc100         | 1.1280  | -0.2906 | 1.419  | 0.292 | 4.863  | 1.2e-06 |
| gc250         | -1.0933 | -0.6600 | -0.433 | 0.357 | -1.215 | 2.2e-01 |
| gc500         | -1.0678 | -0.4015 | -0.666 | 0.409 | -1.627 | 1.0e-01 |
| gc1000        | -3.0843 | -2.8267 | -0.258 | 0.468 | -0.551 | 5.8e-01 |
| gc2000        | -3.7401 | -3.8597 | 0.120  | 0.550 | 0.218  | 8.3e-01 |
| gc5000        | -4.2306 | -4.5470 | 0.316  | 0.703 | 0.450  | 6.5e-01 |
| gc10000       | -1.6375 | -1.2920 | -0.345 | 0.771 | -0.448 | 6.5e-01 |
| gc25000       | -2.3686 | -2.2701 | -0.099 | 1.053 | -0.094 | 9.3e-01 |
| gc50000       | -0.1027 | -0.4486 | 0.346  | 1.255 | 0.276  | 7.8e-01 |
| gc100000      | -2.1607 | -0.3436 | -1.817 | 1.408 | -1.291 | 2.0e-01 |
| gc250000      | 8.2597  | 4.4049  | 3.855  | 1.536 | 2.509  | 1.2e-02 |
| gc500000      | 3.5151  | 6.2932  | -2.778 | 1.590 | -1.748 | 8.1e-02 |
| gc1000000     | 5.6719  | 2.0019  | 3.670  | 1.491 | 2.462  | 1.4e-02 |
| gc5000000     | 7.8248  | 8.3770  | -0.552 | 1.538 | -0.359 | 7.2e-01 |
| gc10000000    | -0.4855 | 1.7229  | -2.208 | 1.165 | -1.896 | 5.8e-02 |

For the most part the coefficients agree well, but gc20, gc50 and gc100 show striking differences.

## 7 Combined vs Separate Regressions

To make it easier to compare the regression results using all variables in a single regression in 5 to those in using all but the GC variables in 4 and just the GC variables in 3, here is a table in which the coefficients in 4 and 3 (labelled with the suffix `sepGC`) are subtracted from those in 5 (labelled with the suffix `all`) while the differences are labelled with the suffix `Diff`).

|                        | Avr.all | Mse.all | Avr.sepGC | Mse.sepGC | Avr.Diff | Mse.Diff |
|------------------------|---------|---------|-----------|-----------|----------|----------|
| score20bp              | 0.962   | 0.939   | 0.963     | 0.927     | -0.001   | 0.013    |
| score50bp - score20bp  | 0.968   | 0.923   | 0.937     | 1.005     | 0.031    | -0.082   |
| score100bp - score50bp | 0.768   | 0.748   | 0.799     | 0.608     | -0.031   | 0.140    |
| ace.100k               | 0.571   | 0.545   | 0.697     | 0.675     | -0.126   | -0.130   |
| ace.200k               | -0.219  | -0.135  | -0.376    | -0.233    | 0.156    | 0.099    |
| ace.500k               | 0.051   | -0.051  | -0.004    | -0.085    | 0.056    | 0.034    |
| ace.1M                 | 0.002   | 0.056   | -0.025    | 0.051     | 0.027    | 0.006    |
| ace.2M                 | -0.333  | -0.350  | -0.100    | -0.187    | -0.233   | -0.162   |
| uni.100k               | 0.354   | 0.270   | 0.399     | 0.293     | -0.045   | -0.023   |

|               |        |        |        |        |        |        |
|---------------|--------|--------|--------|--------|--------|--------|
| uni.200k      | -0.101 | -0.048 | -0.161 | -0.113 | 0.060  | 0.066  |
| uni.500k      | 0.068  | 0.051  | 0.003  | -0.038 | 0.065  | 0.089  |
| uni.1M        | -0.033 | -0.002 | -0.122 | -0.130 | 0.089  | 0.128  |
| uni.2M        | -0.294 | -0.244 | -0.034 | 0.045  | -0.260 | -0.290 |
| low.ex.250k   | 0.478  | 0.529  | 0.497  | 0.583  | -0.019 | -0.054 |
| med.ex.250k   | 0.466  | 0.401  | 0.492  | 0.429  | -0.026 | -0.027 |
| high.ex.250k  | 0.204  | 0.221  | 0.184  | 0.159  | 0.021  | 0.061  |
| low.ex.2M     | 0.135  | 0.081  | 0.326  | 0.213  | -0.190 | -0.131 |
| med.ex.2M     | 0.120  | 0.110  | -0.018 | -0.018 | 0.137  | 0.127  |
| high.ex.2M    | 0.113  | 0.191  | 0.017  | 0.158  | 0.096  | 0.034  |
| cpg.dens.50k  | 0.089  | 0.019  | -0.113 | -0.209 | 0.202  | 0.228  |
| cpg.dens.250k | -0.458 | -0.308 | -0.117 | -0.052 | -0.342 | -0.256 |
| dnaseI.100k   | 0.539  | 0.628  | 0.356  | 0.454  | 0.184  | 0.174  |
| dnaseI.1M     | 0.170  | 0.094  | 0.560  | 0.357  | -0.389 | -0.263 |
| LEDGF         | 0.420  | 0.479  | 0.413  | 0.448  | 0.006  | 0.031  |
| ensGene.genes | 0.493  | 0.425  | 0.589  | 0.568  | -0.096 | -0.143 |
| refGene.genes | 0.306  | 0.358  | 0.372  | 0.410  | -0.066 | -0.052 |
| gc20          | 0.814  | -0.783 | 0.854  | 0.752  | -0.040 | -1.535 |
| gc50          | 1.086  | -0.576 | -1.557 | -1.221 | 2.642  | 0.645  |
| gc100         | 1.128  | -0.291 | -0.907 | -0.529 | 2.035  | 0.238  |
| gc250         | -1.093 | -0.660 | -1.350 | -0.508 | 0.257  | -0.152 |
| gc500         | -1.068 | -0.401 | -1.371 | -0.882 | 0.304  | 0.481  |
| gc1000        | -3.084 | -2.827 | -2.742 | -2.200 | -0.342 | -0.627 |
| gc2000        | -3.740 | -3.860 | -3.983 | -4.318 | 0.243  | 0.458  |
| gc5000        | -4.231 | -4.547 | -3.817 | -4.165 | -0.413 | -0.382 |
| gc10000       | -1.637 | -1.292 | -2.436 | -2.636 | 0.799  | 1.344  |
| gc25000       | -2.369 | -2.270 | -2.535 | -2.936 | 0.166  | 0.666  |
| gc50000       | -0.103 | -0.449 | -0.888 | -0.911 | 0.785  | 0.462  |
| gc100000      | -2.161 | -0.344 | 2.035  | 2.924  | -4.196 | -3.267 |
| gc250000      | 8.260  | 4.405  | 12.876 | 11.035 | -4.617 | -6.630 |
| gc500000      | 3.515  | 6.293  | 8.905  | 10.660 | -5.390 | -4.366 |
| gc1000000     | 5.672  | 2.002  | 9.157  | 7.917  | -3.486 | -5.916 |
| gc5000000     | 7.825  | 8.377  | 3.559  | 4.231  | 4.266  | 4.146  |
| gc10000000    | -0.486 | 1.723  | -2.554 | -1.992 | 2.069  | 3.714  |

Many of the GC coefficients are greatly reduced in magnitude when the other variables are included in the regression, which suggests that the effects that they represent are partially accounted for by other variables. Also, the signs of the coefficients for `gc50` and `gc100` change for the **AVR** data, the signs for `gc20` change for both datasets (but in opposite directions), and the point at which a long run of negative effects changes to positive effects shifts from between `gc50000` and `gc100000` to between `gc100000` and `gc250000`.

The effects of `ace.2M`, `uni.2M`, `low.ex.2M`, `dnaseI.1M` are greatly reduced and `reGene.genes` and `ensGene.genes` are somewhat reduced when the GC variables are included, but the effects of `dnaseI.100k` become stronger.

## References

- [Therneau and Lumley, 2006] Therneau, T. and Lumley, T. (2006). *survival: Survival analysis, including penalised likelihood. S original by Terry Therneau and ported by Thomas Lumley*. R package version 2.24.
