# Supplementary material for: HIV integration site selection: Analysis by massively parallel pyrosequencing reveals association with epigenetic modifications
Source: HighWire-hosted journal article supplement (doi:10.1101/gr.6286907), 2007-06-01
Supplement: TableS1-attrition-5.pdf [file TableS1-attrition-5.pdf]

## Attrition Analysis

| Name                        | Sequences | Trimmed | Aligned | % of Sequences | Less than Three | % of Aligned | Unique Hits | % of Less than 3 | Set Size | % of Unique | Passing Set Size | % of Set Size | Homopolymeric correction | % of Total |
|-----------------------------|-----------|---------|---------|----------------|-----------------|--------------|-------------|------------------|----------|-------------|------------------|---------------|--------------------------|------------|
| Wang-VSVGgfp-Jurkat-454-Avr | 92321     | 71259   | 39518   | 55.46%         | 37461           | 94.79%       | 35035       | 93.52%           | 25682    | 73.30%      | 20067            | 78.14%        | 19962                    | 28.01      |
| Wang-VSVGgfp-Jurkat-454-Mse | 73351     | 73237   | 37454   | 51.14%         | 35051           | 93.58%       | 32943       | 93.99%           | 26985    | 81.91%      | 20694            | 76.69%        | 20607                    | 28.13      |

Sequences - number of sequences with obtained from pyrosequencing. Reads are in one direction only.

Trimmed - number of sequences with perfect primers (Avr) or those trimmed by cross\_match (Mse).

Aligned - number of sequences that returned any alignment in BLAT using default client-server settings.

Less Than Three - number of sequences whose alignment (qStart) began at the first,second, or third base pair position.

Unique Hits - number of sequences that have a unique alignment with the best number of matches. If a sequences aligns to two genomic positions with equally good match scores, it is omitted from the set.

Set size - size of the set after converging hits are compressed. Converging hits refer to sequences that align to the same position. Only the sequence with the best identity is kept.

Passing set size - size of set after a 98% identity criteria is enforced. Sequences must align with 98% identity in the first 50bp, first 100bp, or over the entire alignment.

Homopolymeric correction - distinct sequences that converged within 3 base pairs of each other and showed evidence of homopolymeric sequencing errors were converged.
