# Supplementary figures and images for: HIV integration site selection: Analysis by massively parallel pyrosequencing reveals association with epigenetic modifications
Source: HighWire-hosted journal article supplement (doi:10.1101/gr.6286907), 2007-06-01

# Chr 1

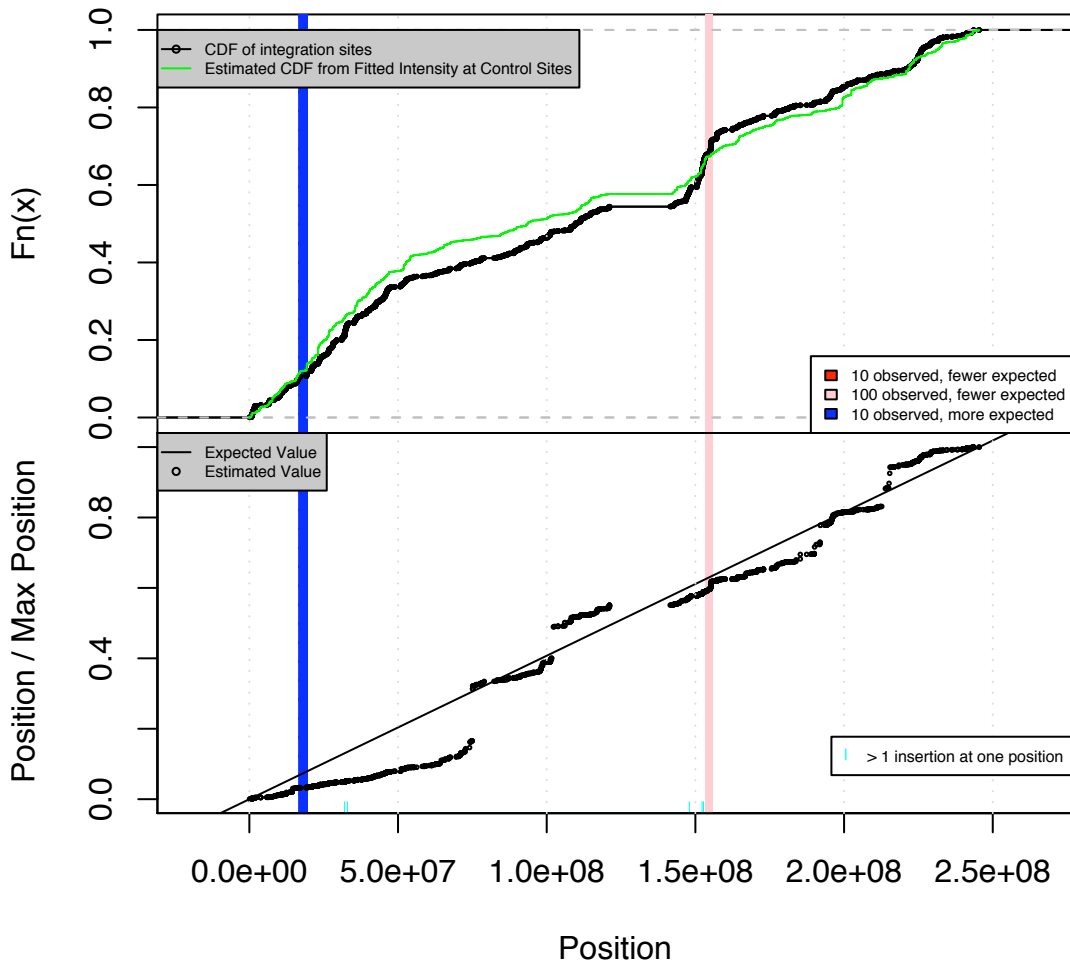

## Chr 2

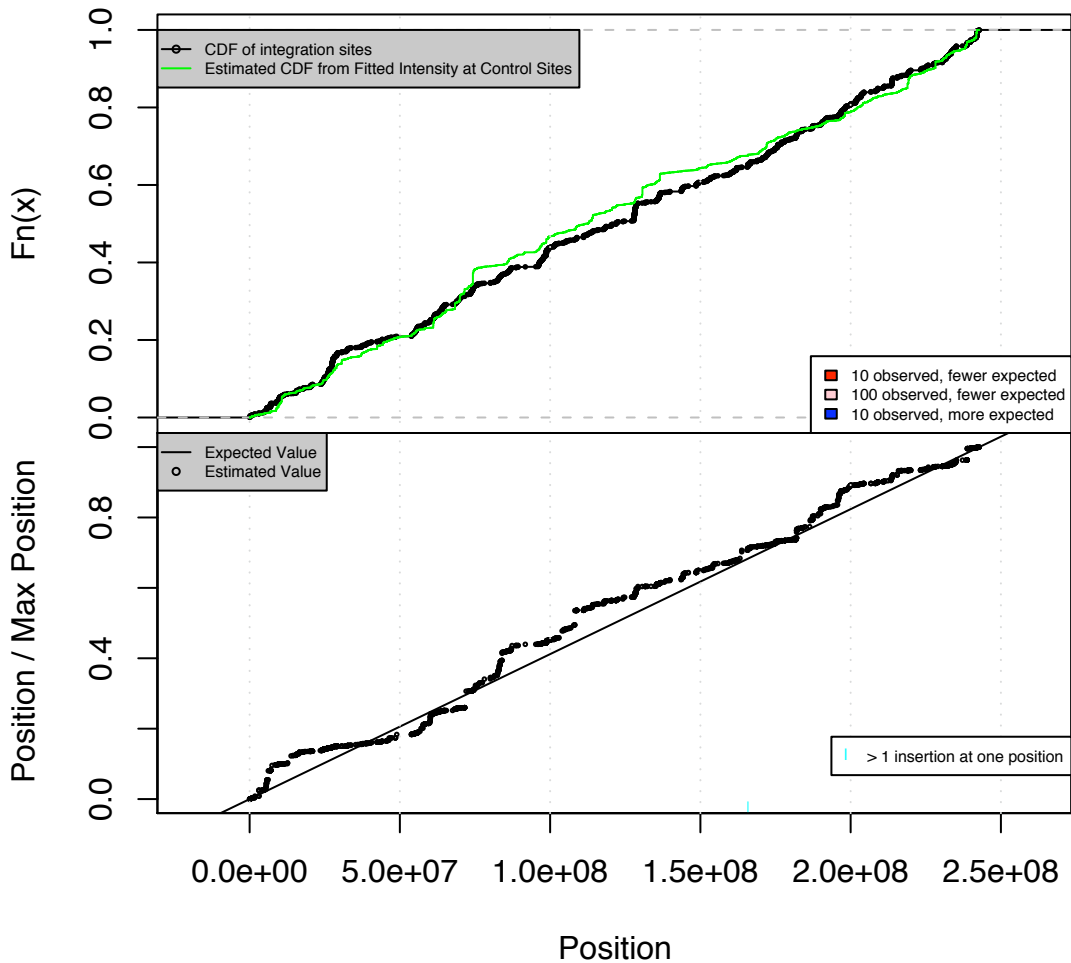

# Chr 3

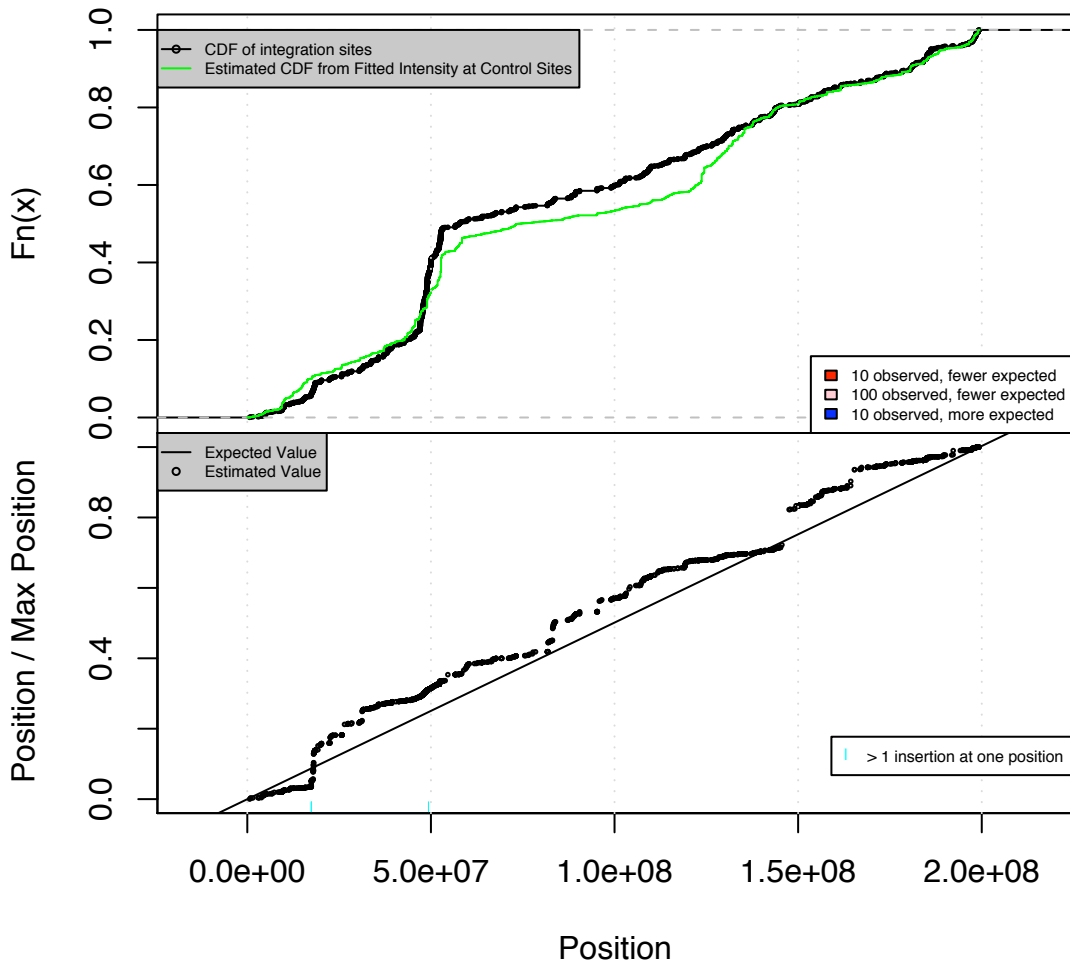

# Chr 4

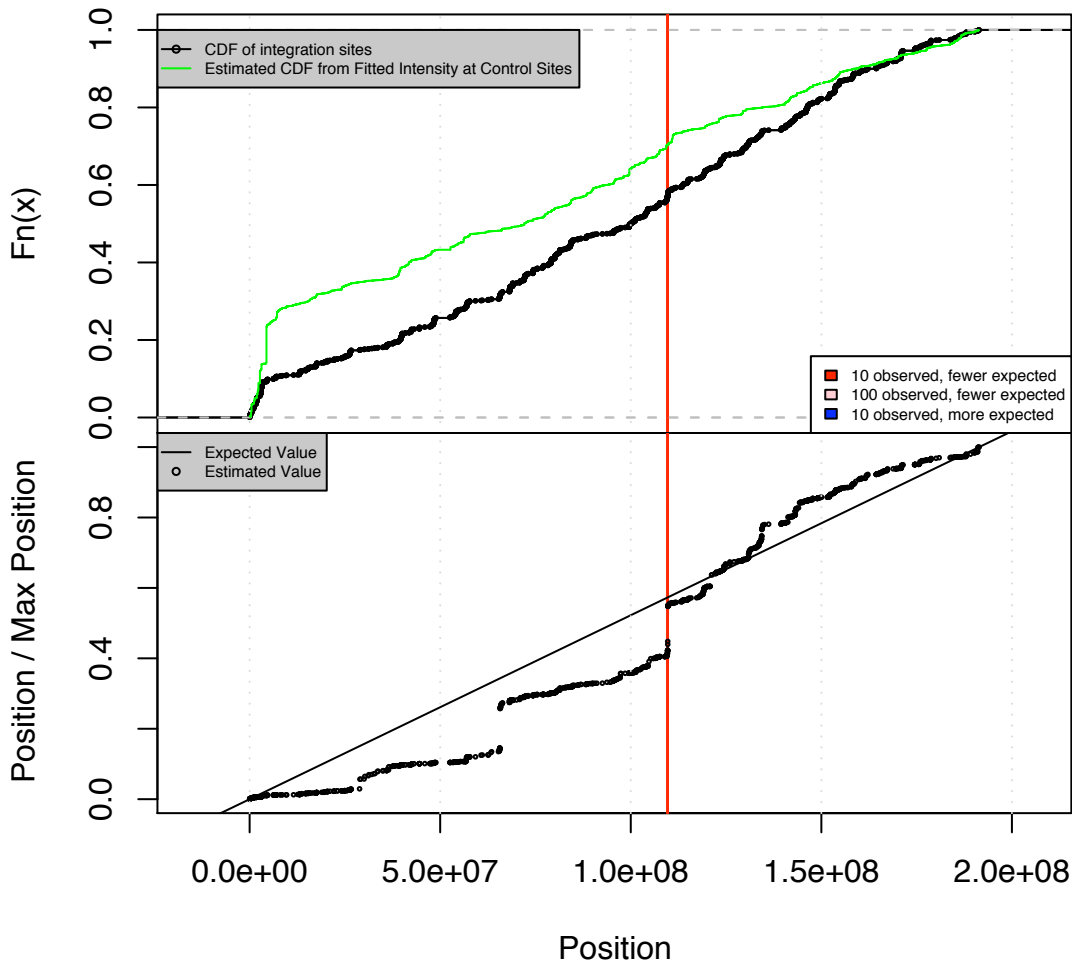

# Chr 5

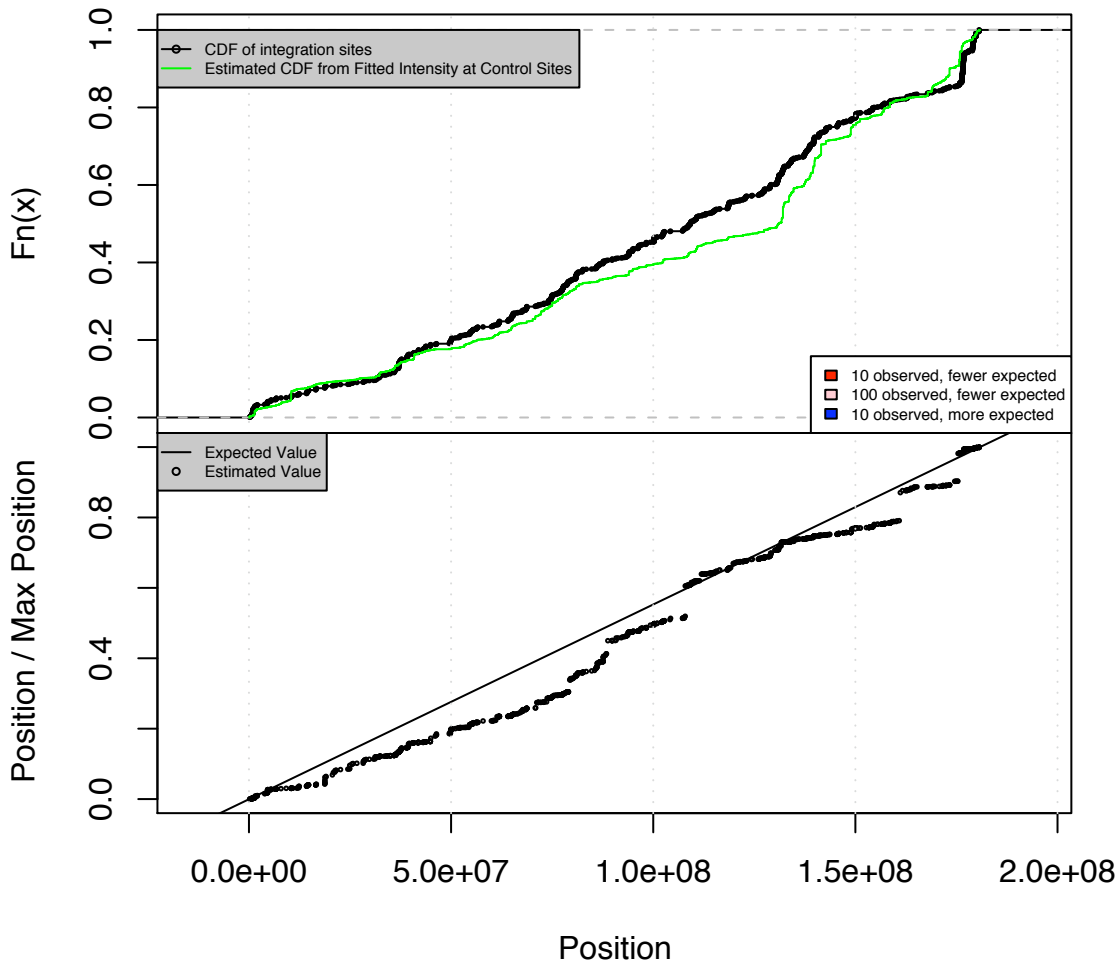

# Chr 6

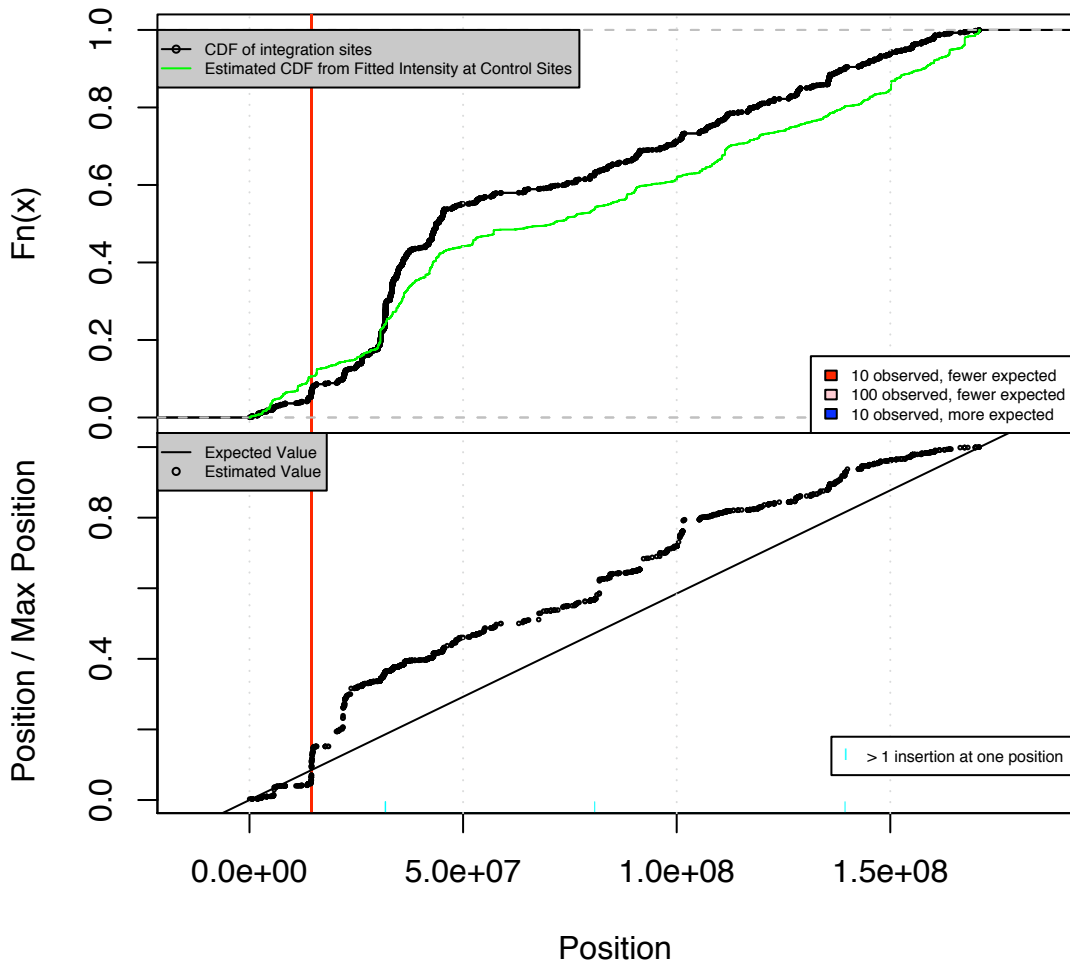

# Chr 7

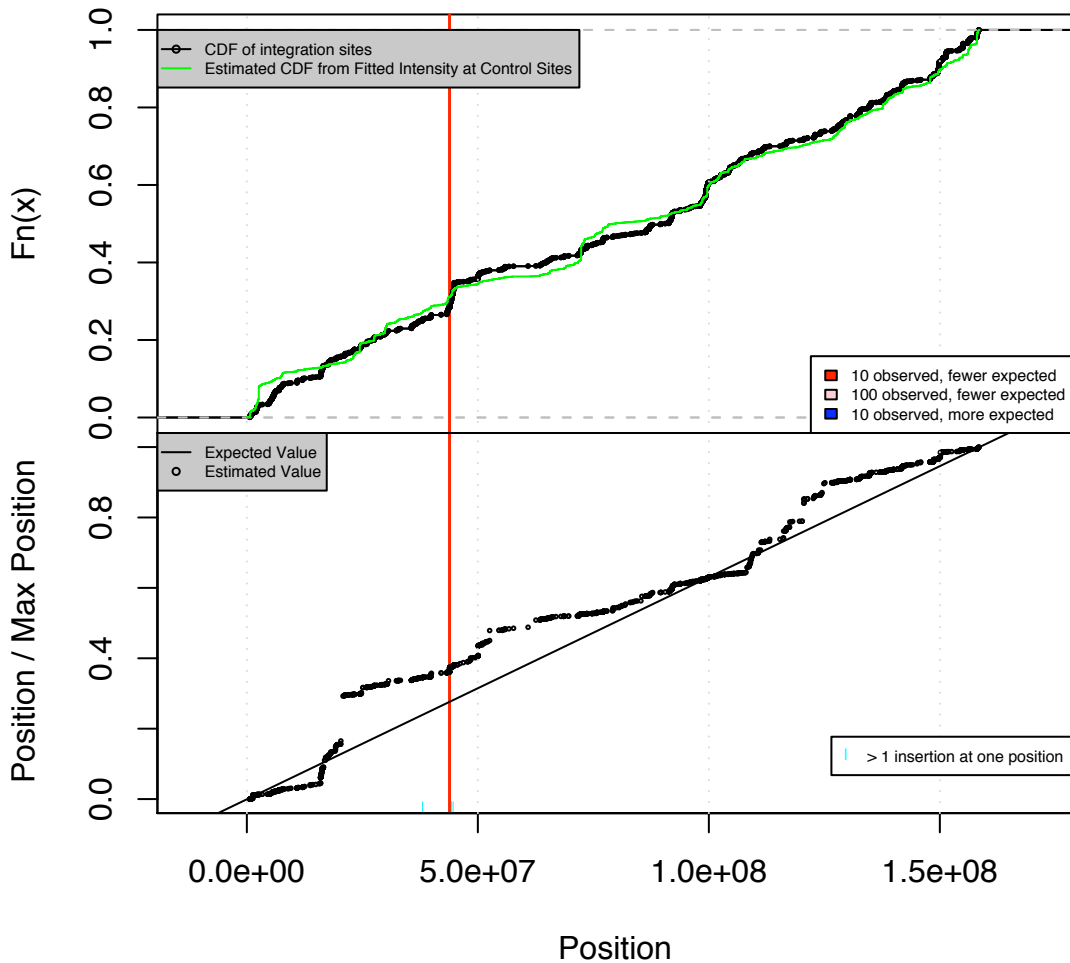

# Chr 8

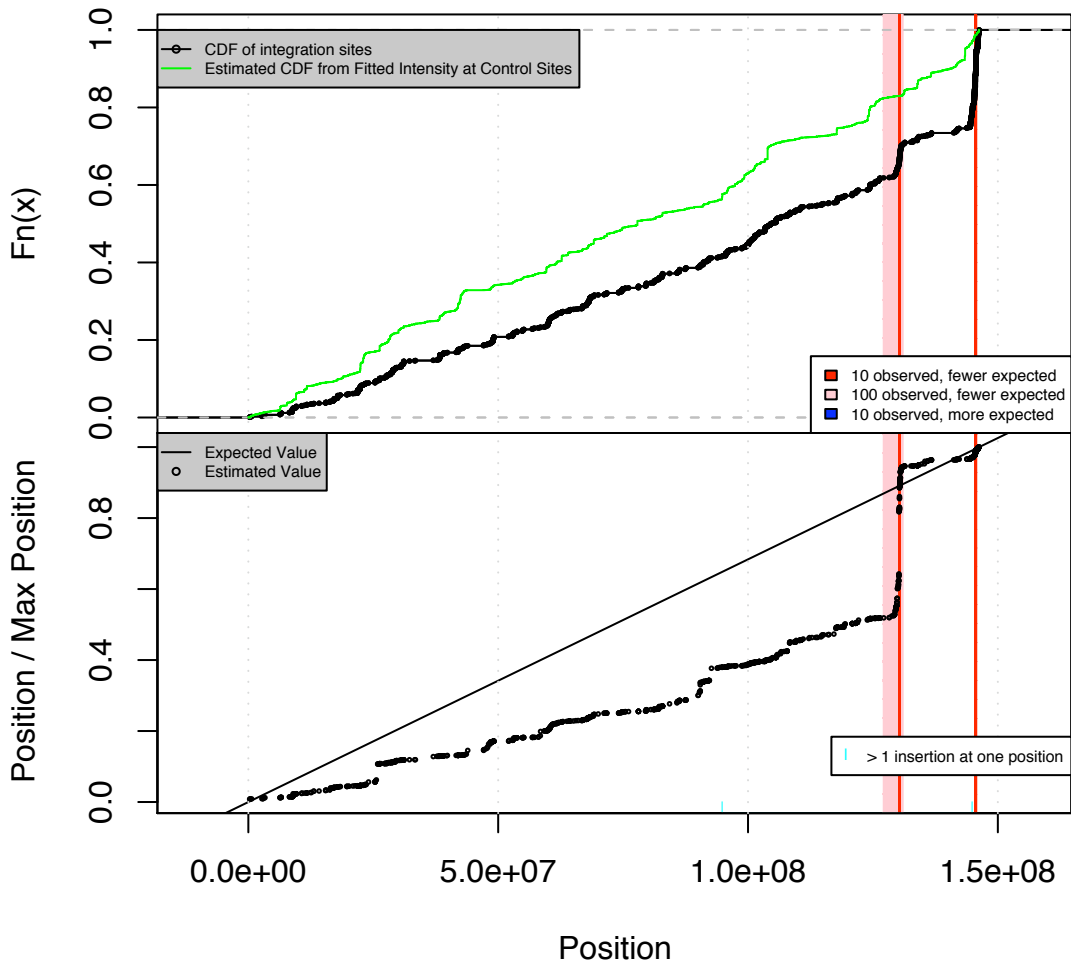



# Chr 9

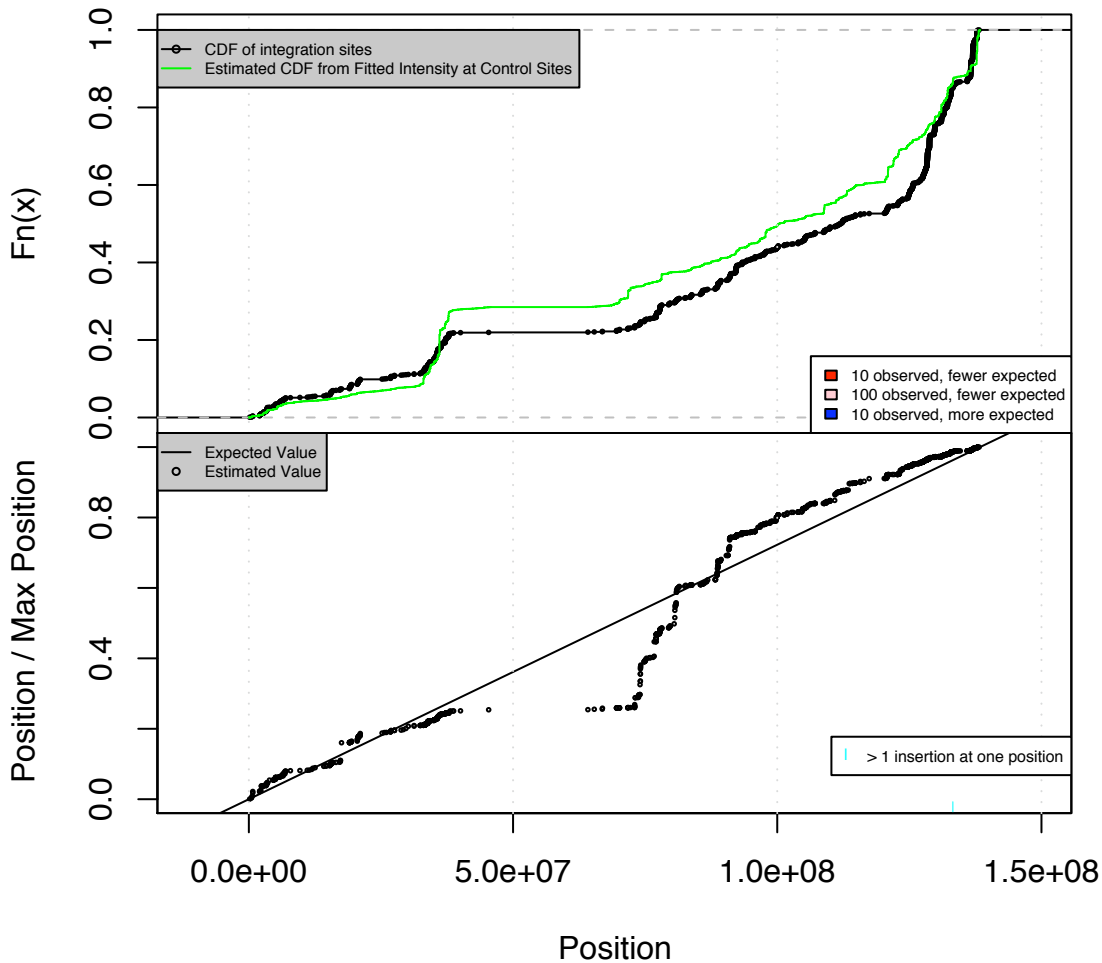

# Chr 10

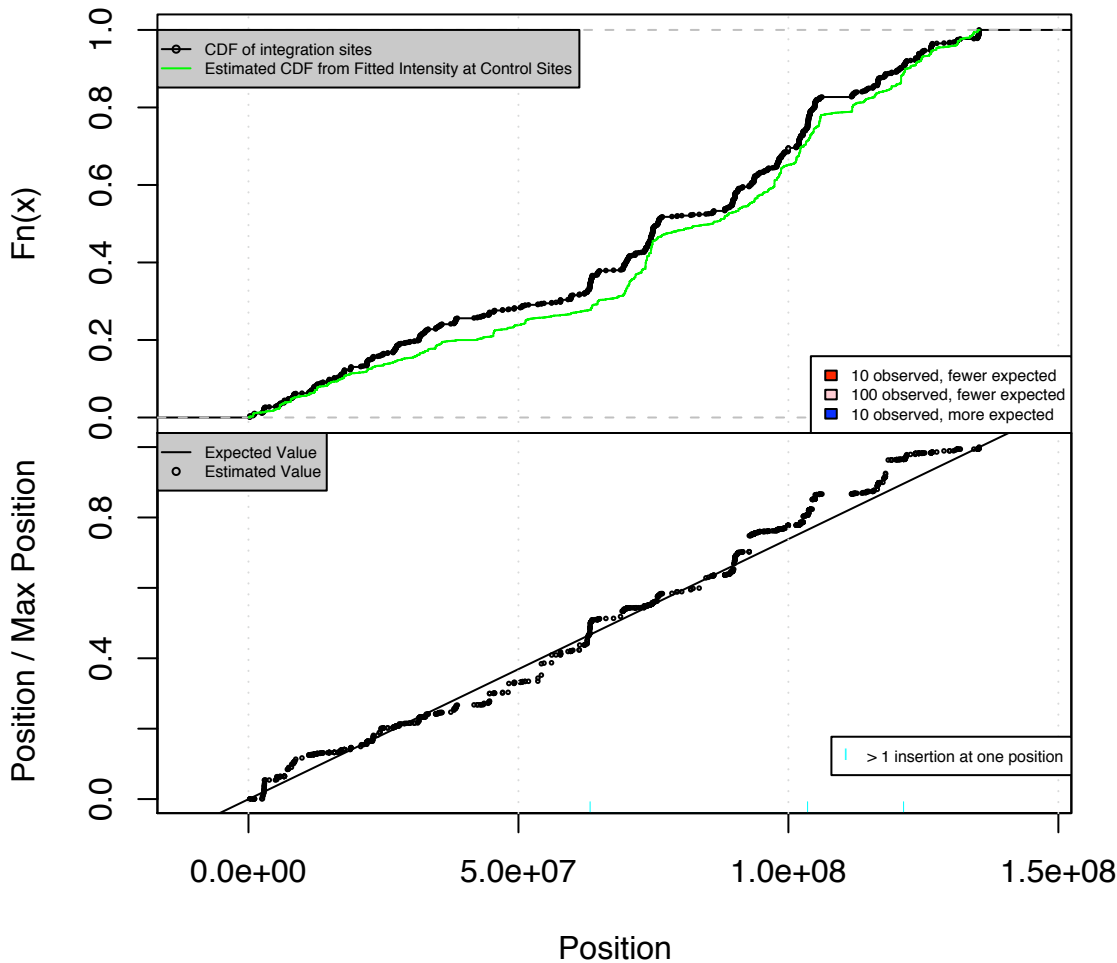

# Chr 11

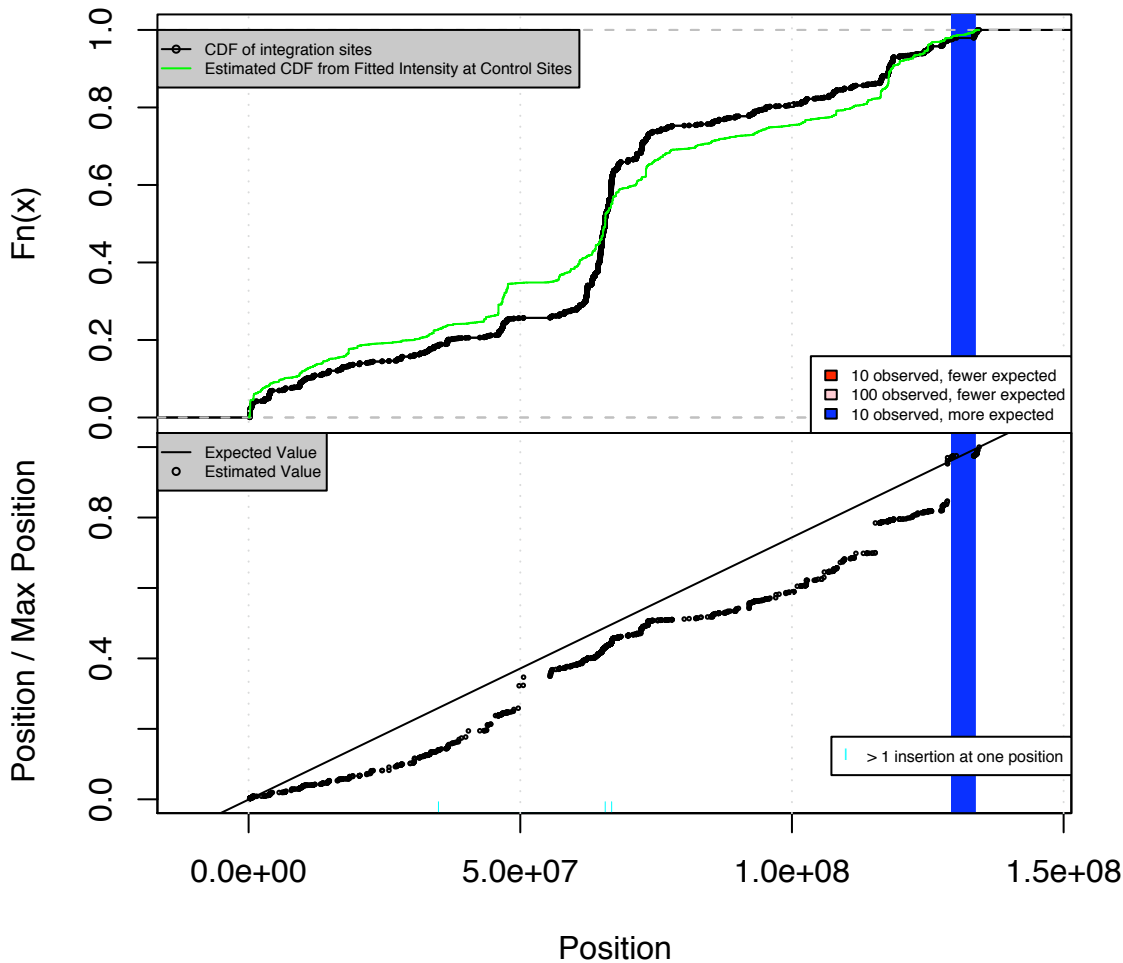

# Chr 12

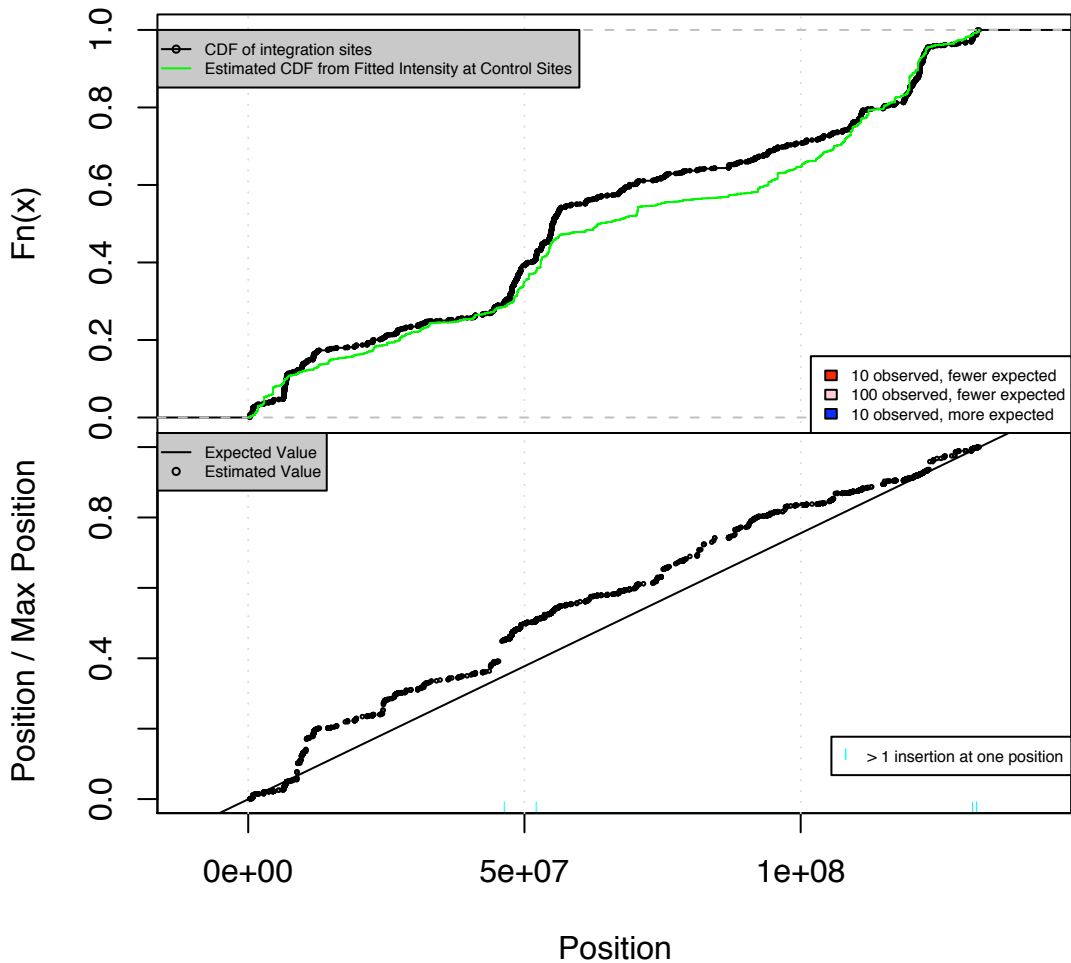

# Chr 13

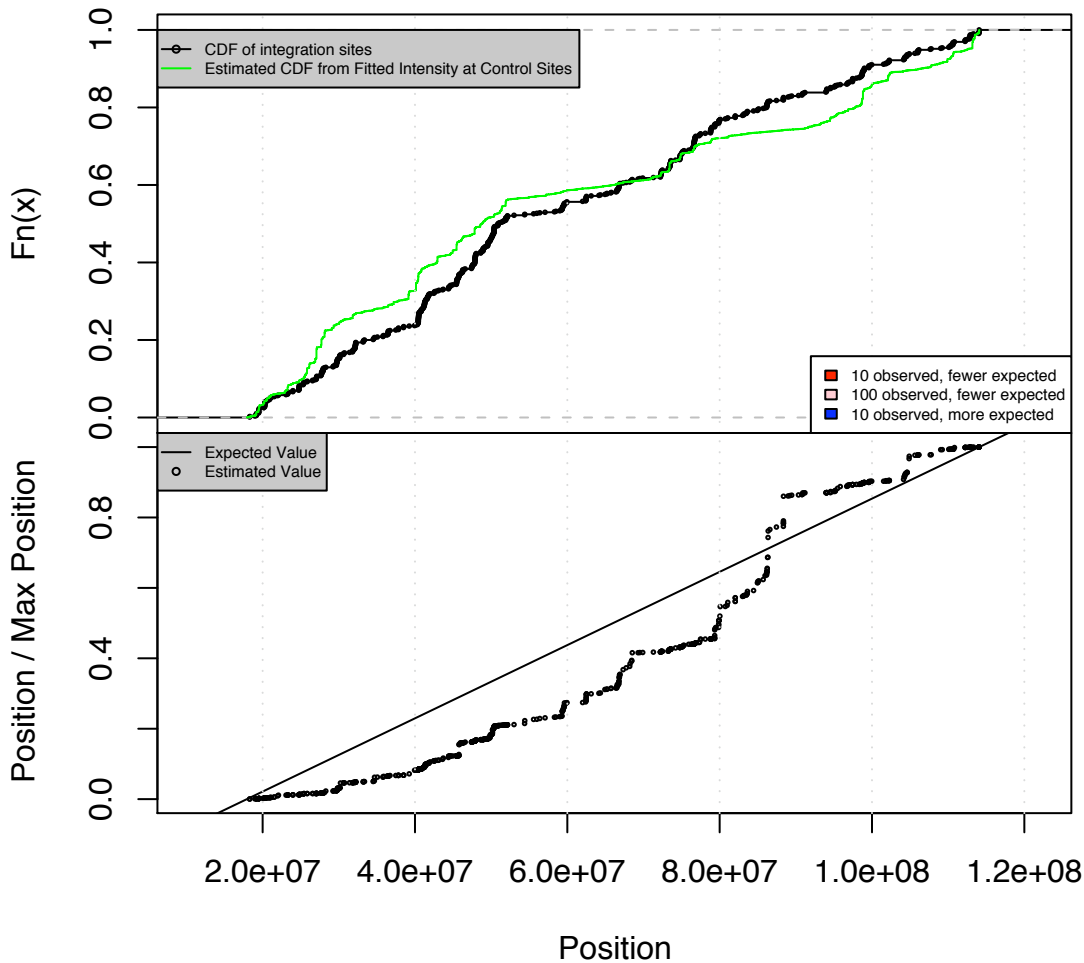

# Chr 14

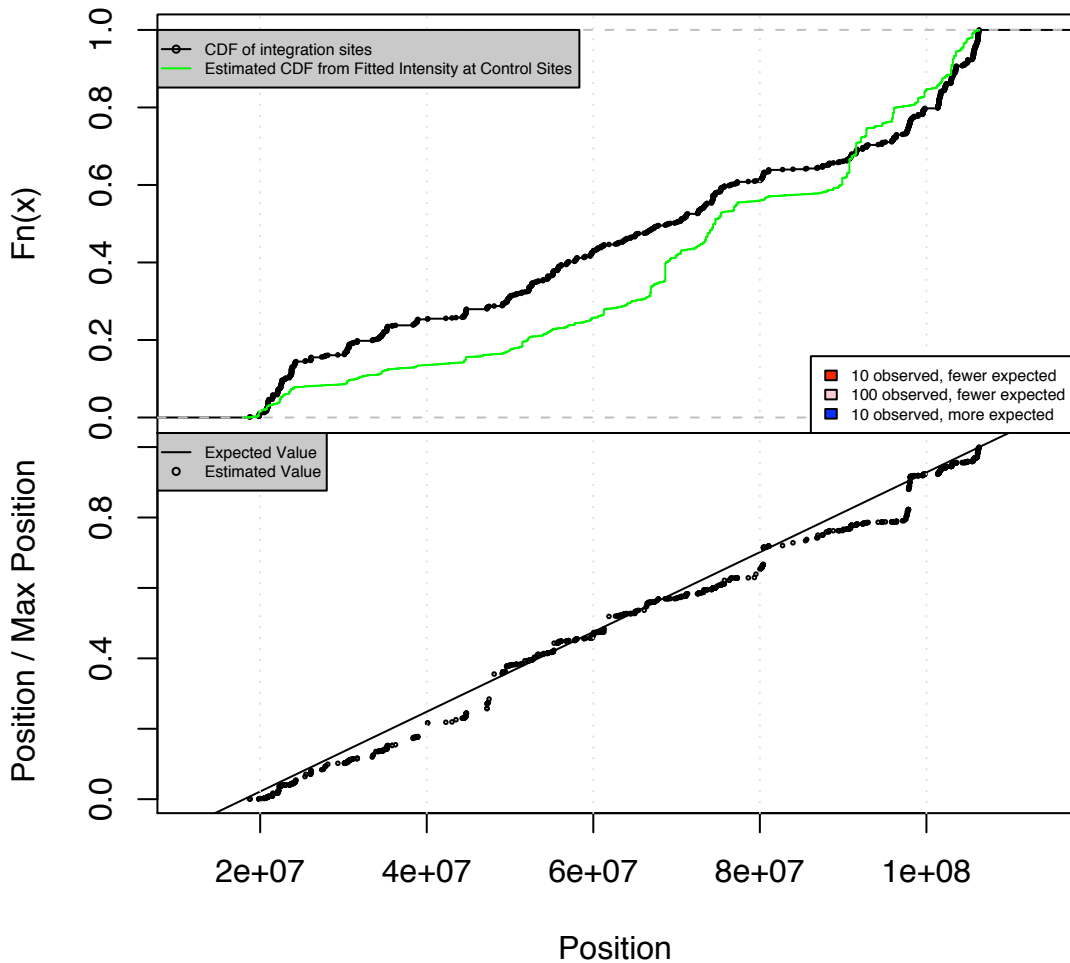

# Chr 15

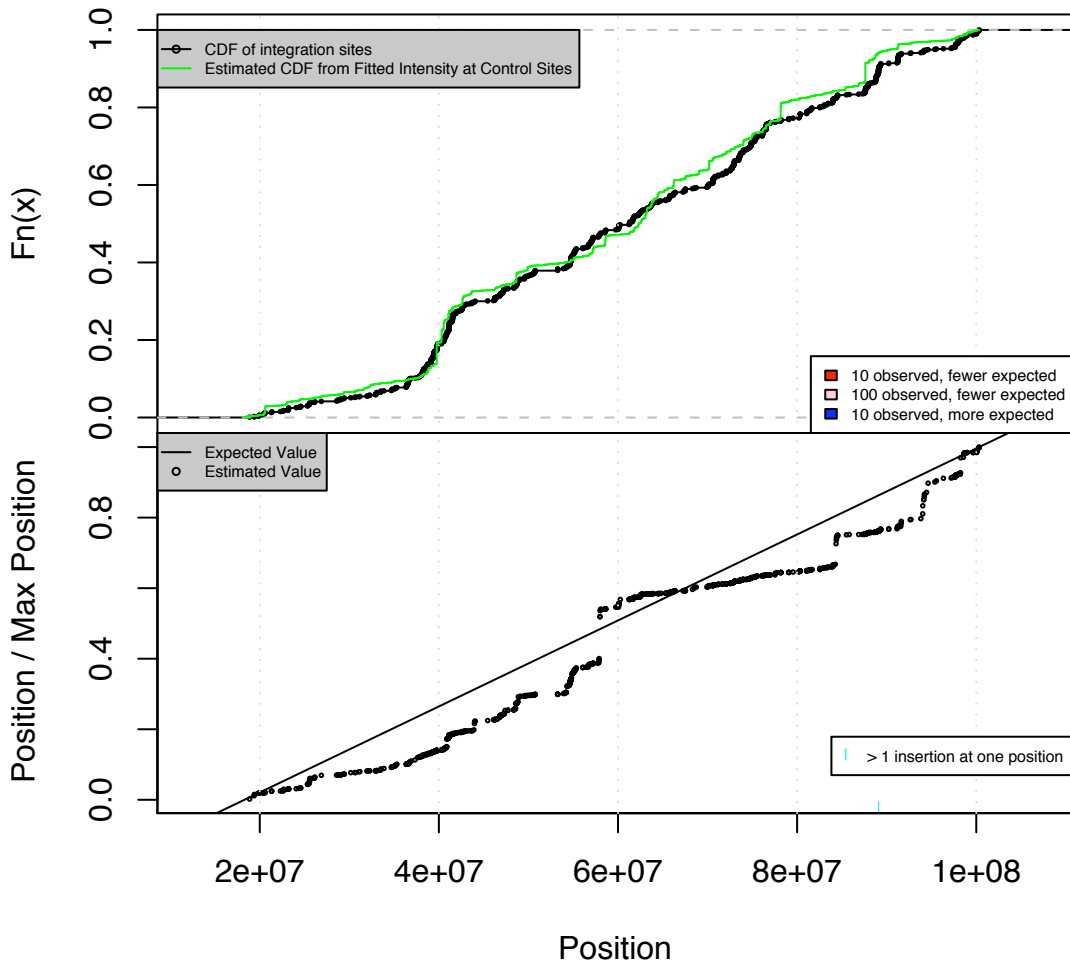

# Chr 16

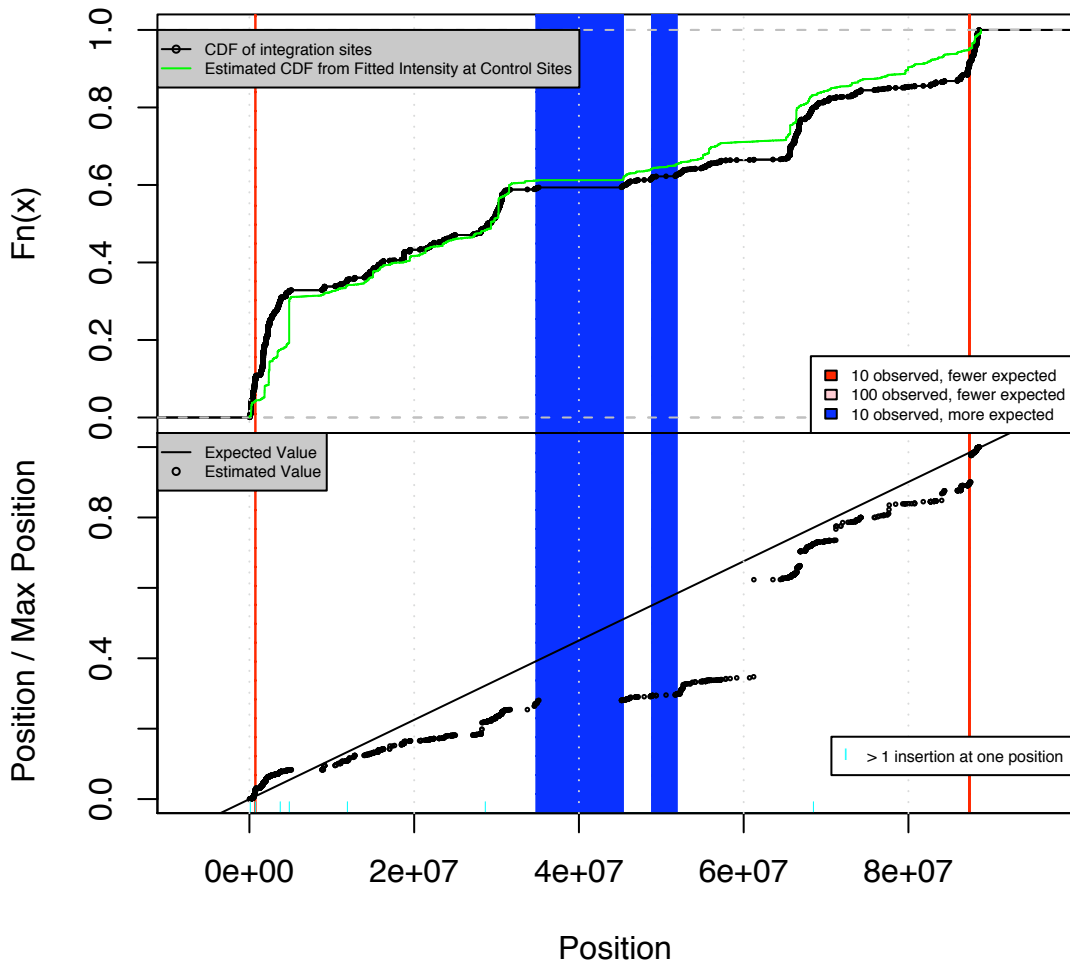



# Chr 17

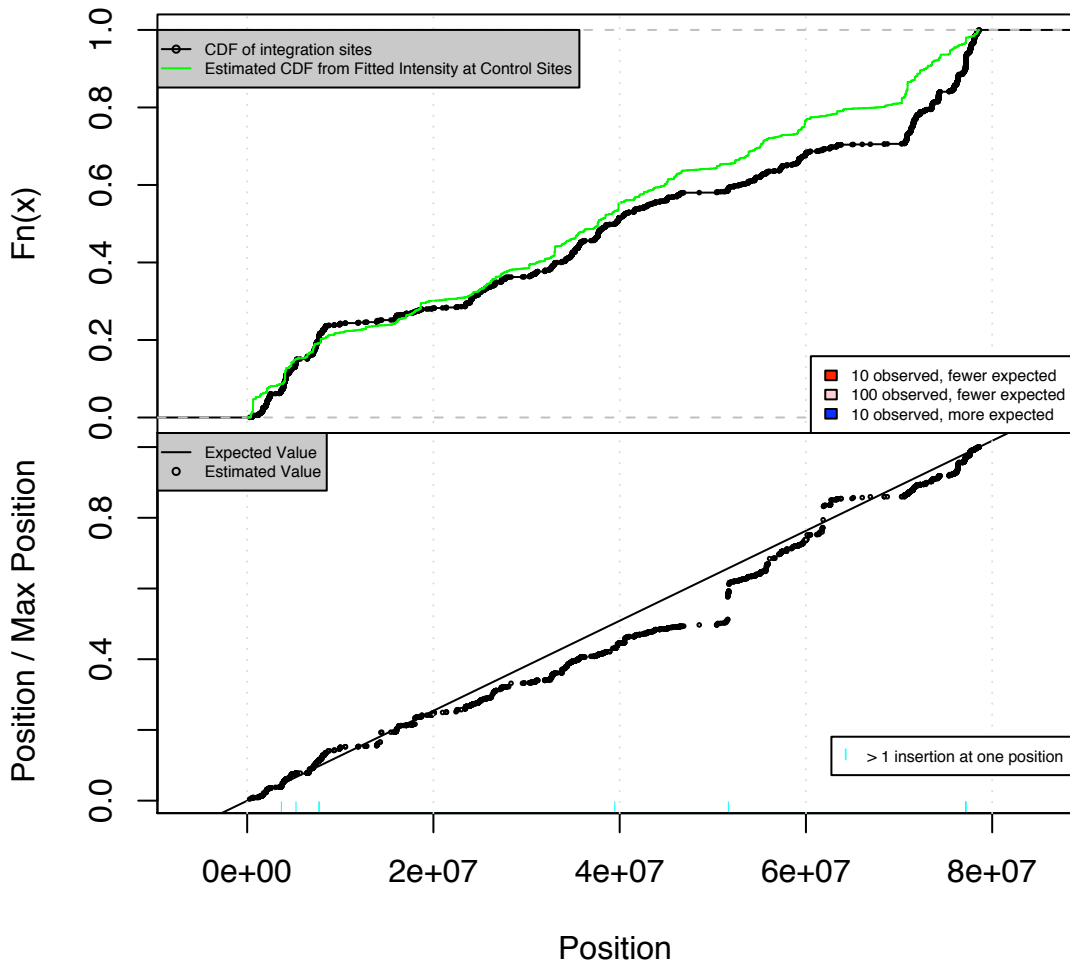

# Chr 18

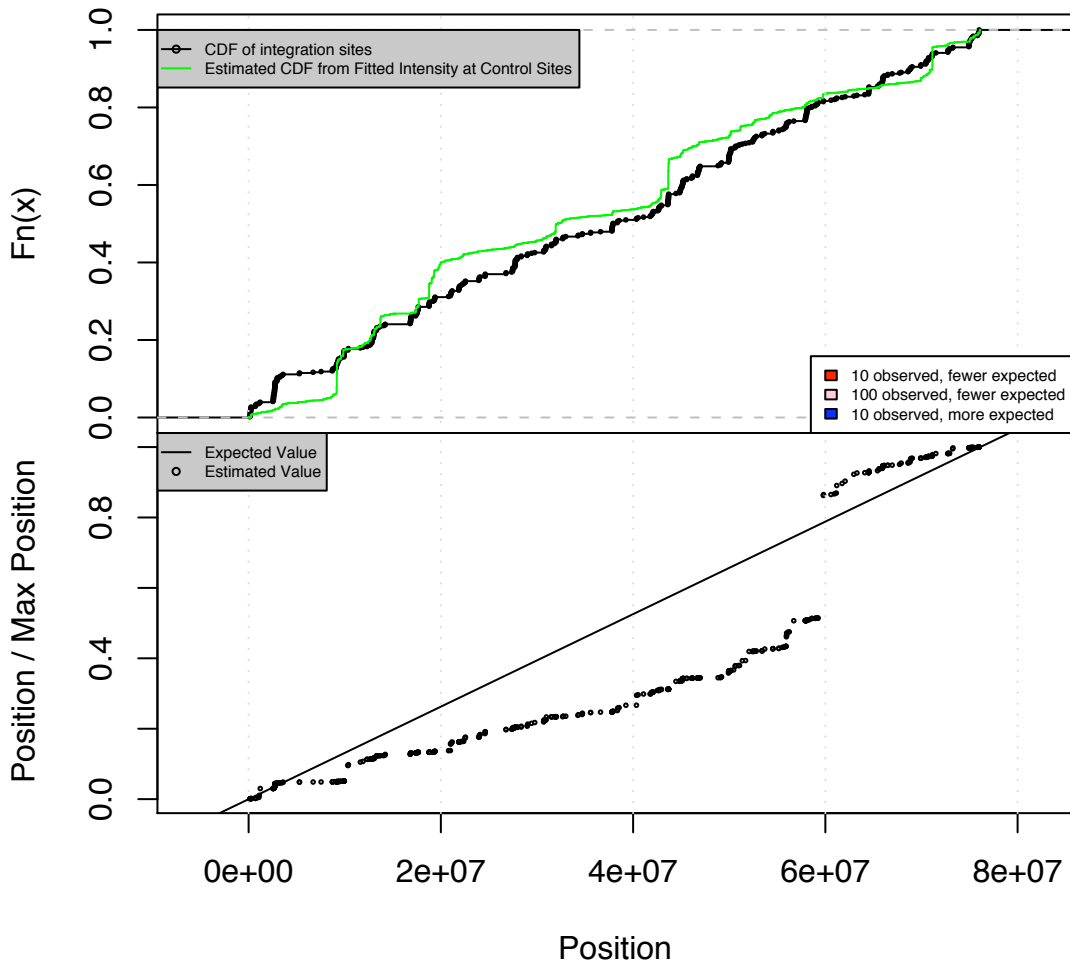

# Chr 19

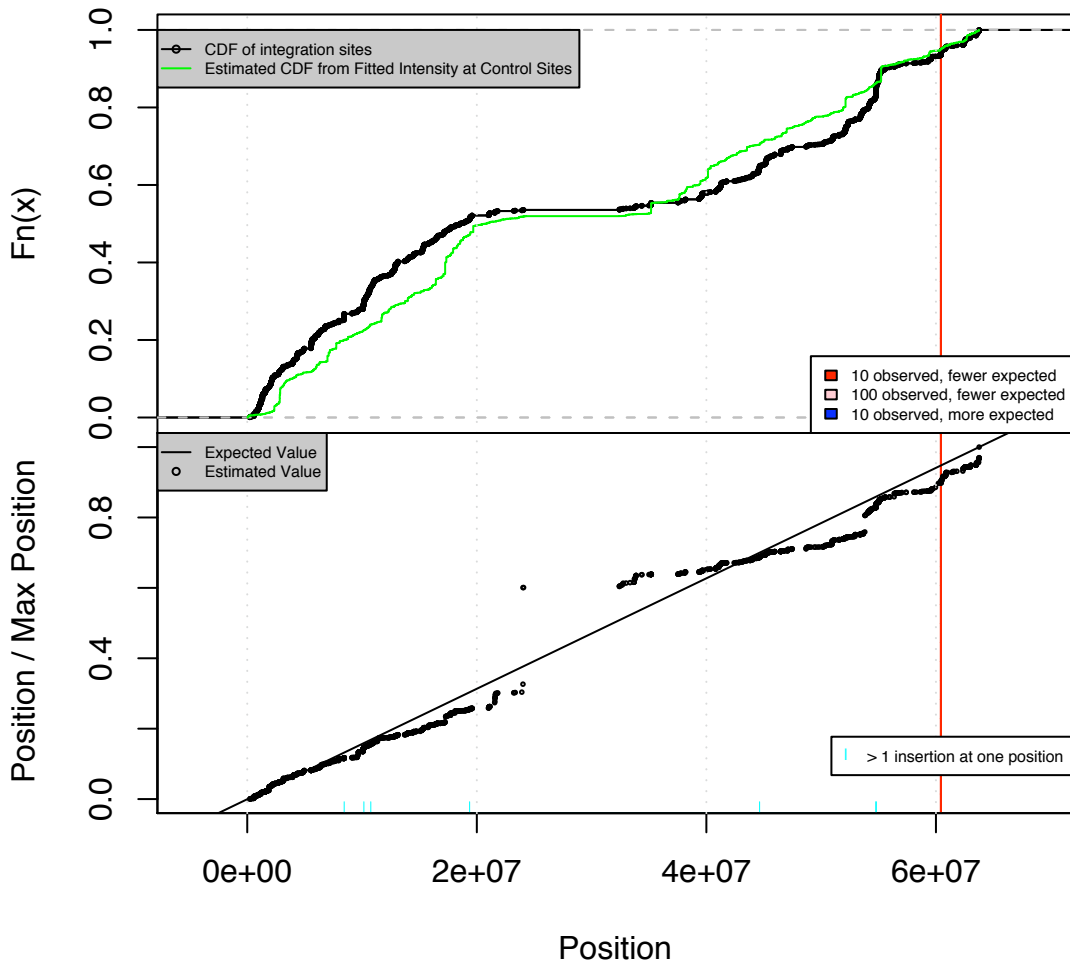

# Chr 20

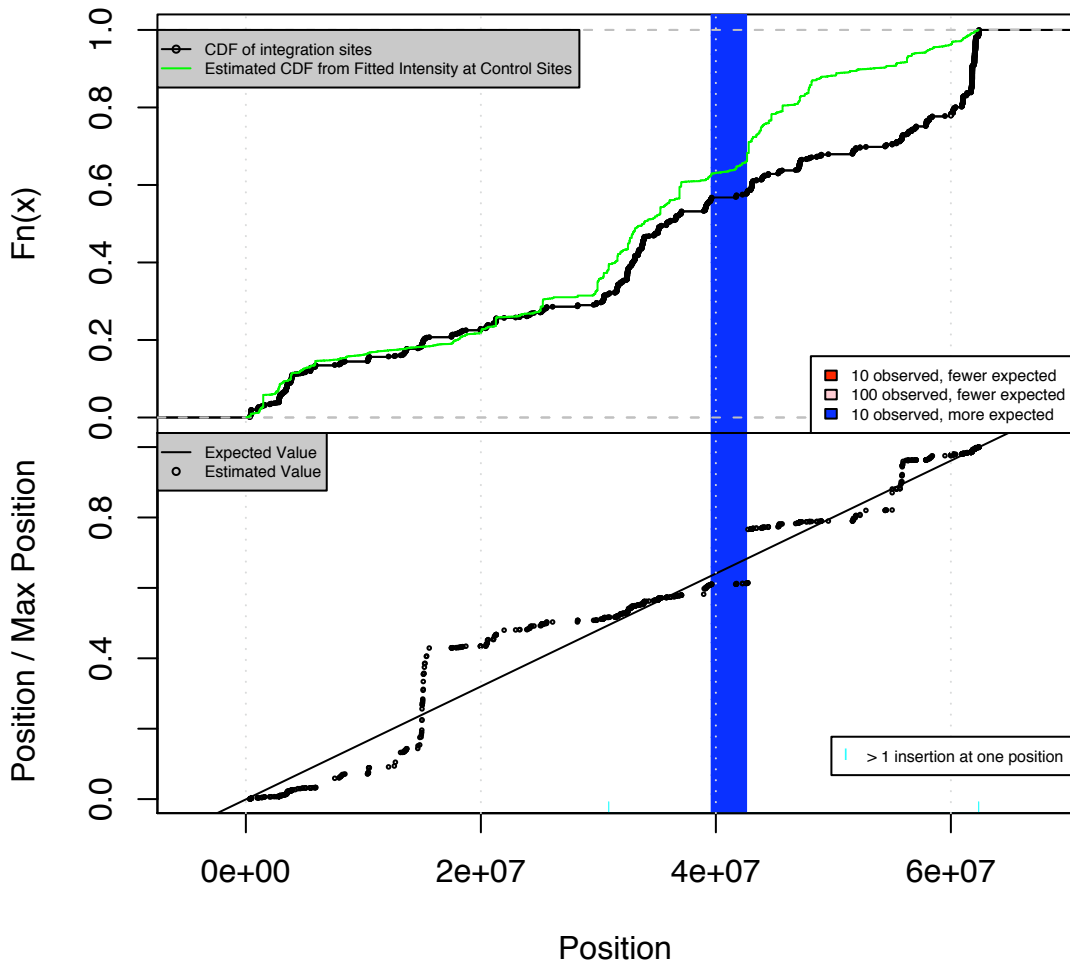

# Chr 21

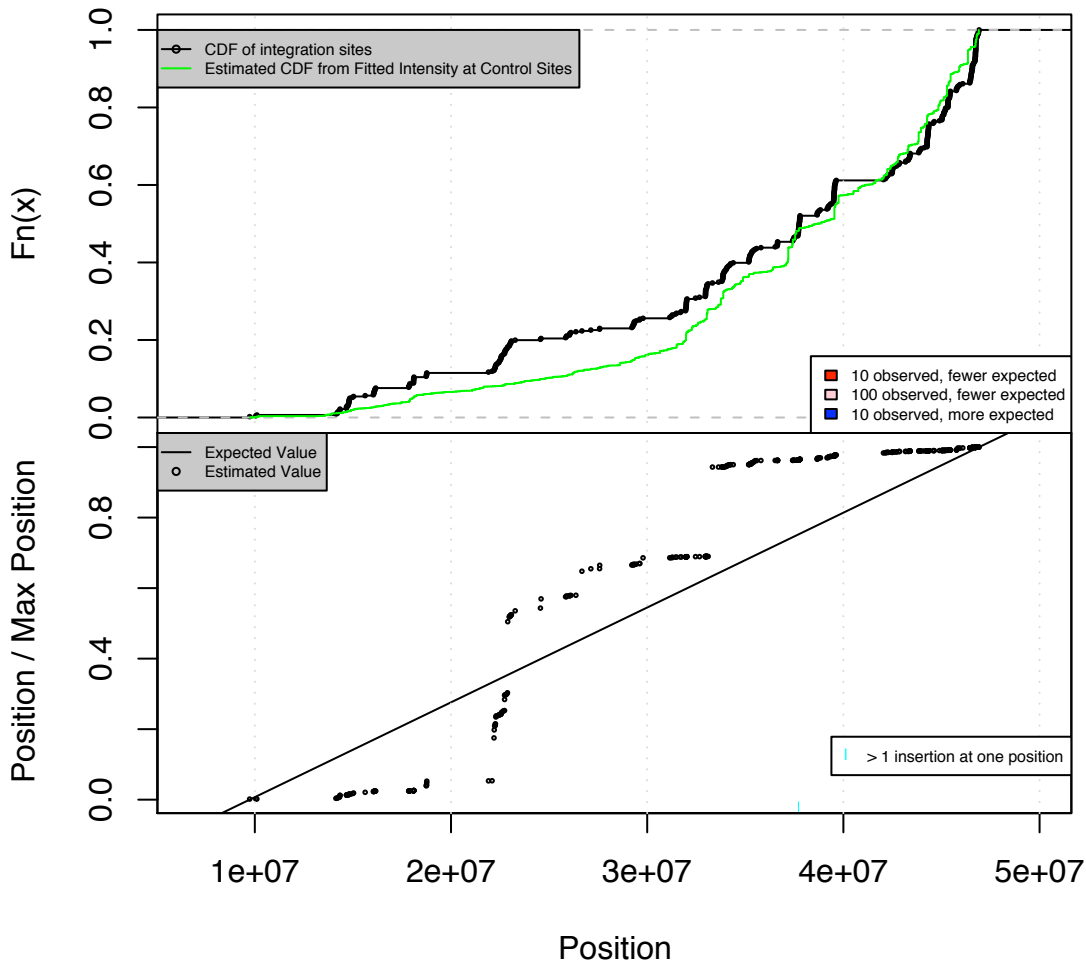

## Chr 22

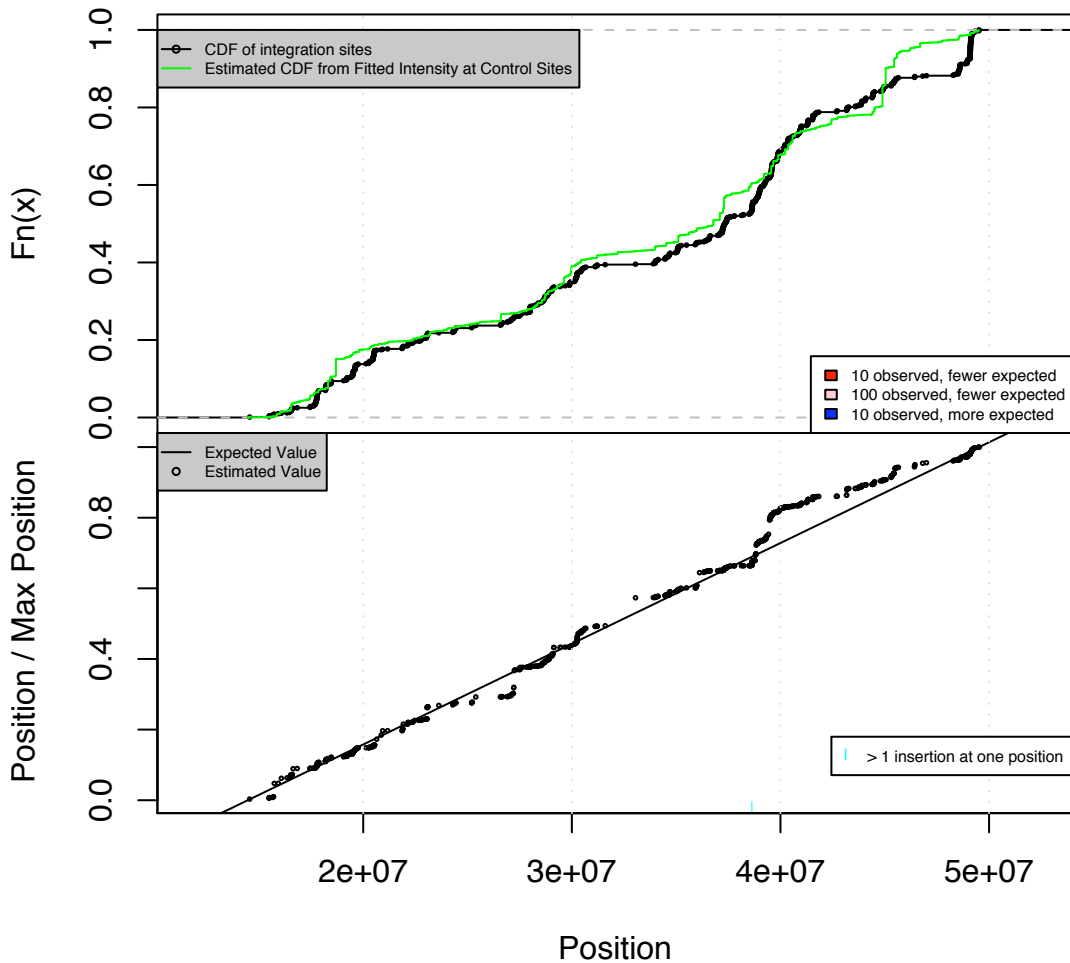

# Chr X

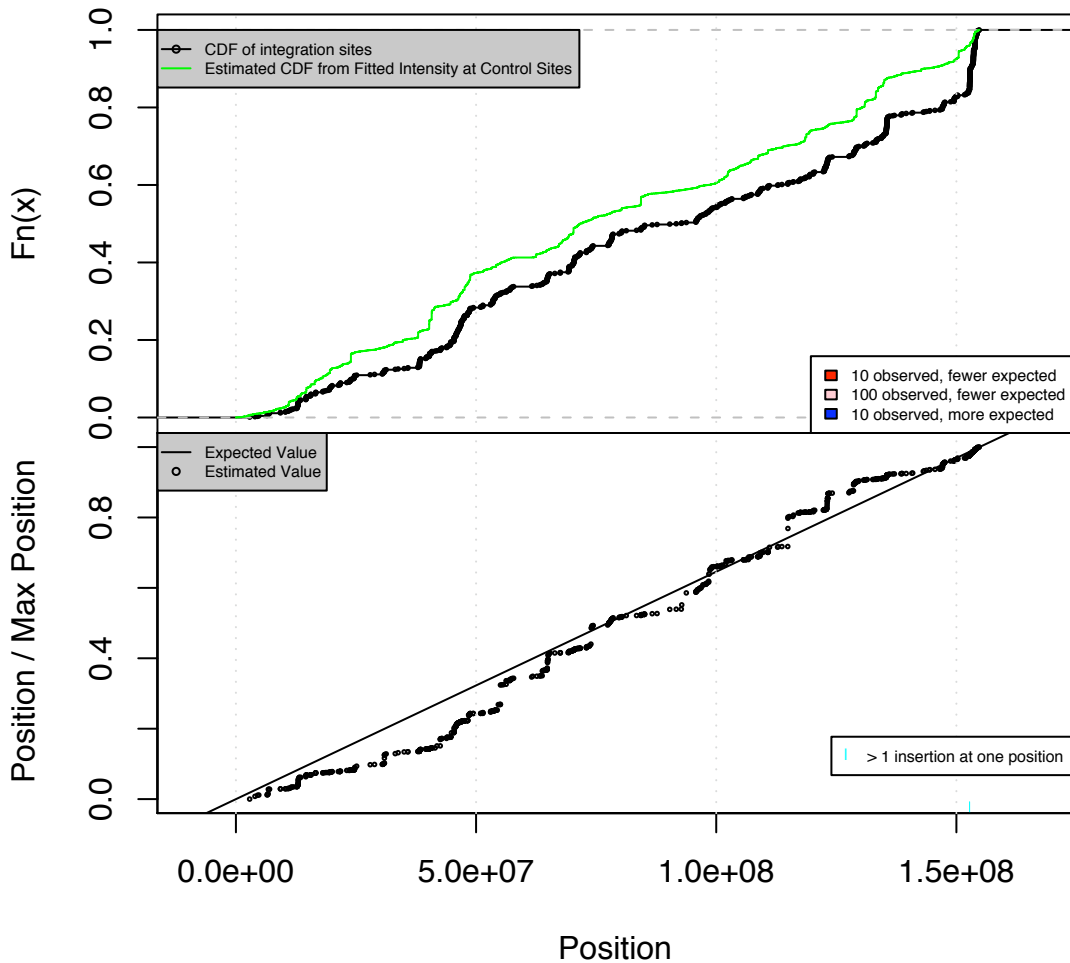

# Chr Y

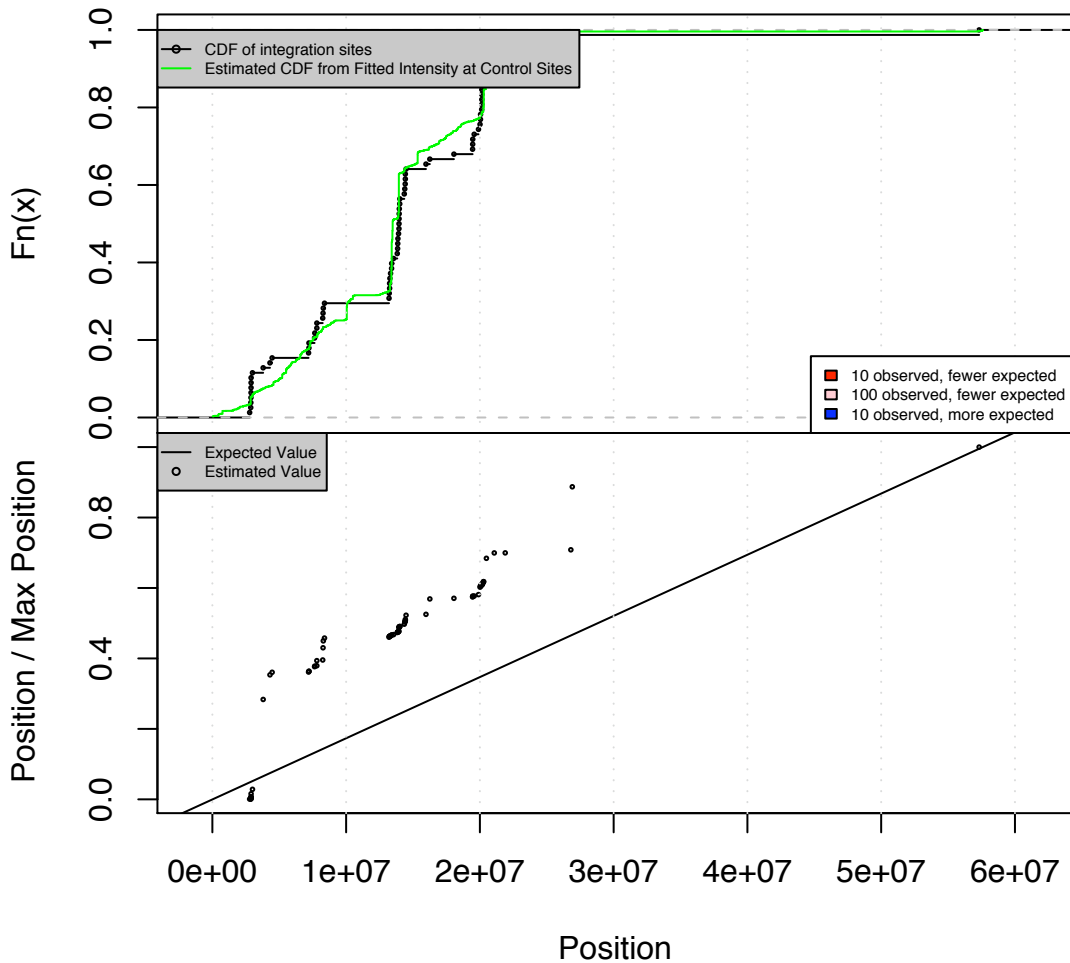

Supplement: SupS4-both-hotregions-1.pdf [file SupS4-both-hotregions-1.pdf]
